# Supplementary material
Source: publisher site journal article supplement (https://www.spandidos-publications.com/6521/downloadSupplementary)
Supplement: Supplementary file 1 [file downloadSupplementary]

## Sheet: GO terms
Table SIII. Results of GO, KEGG, and GSEA enrichment analysis in high and low expression groups based on TCGA-TNBC dataset.
ONTOLOGY	ID	Description	GeneRatio	BgRatio	pvalue	p.adjust	qvalue	geneID	Count
BP	GO:0007059	chromosome segregation	68/813	348/18800	3.45188e-26	1.51676e-22	1.37785e-22	UBE2I/NAA60/CHMP4B/SLX4/EME1/PLK1/LCMT1/OIP5/KIF22/NCAPH/KNSTRN/NDE1/CDC6/DSN1/SKA3/EME2/NSL1/EML4/PRC1/KIFC1/NEK8/ZWILCH/FEN1/CENPX/NEK2/AURKB/SPC25/HJURP/RMI2/SPAG5/BUB1B/CDC20/ANAPC11/SGO1/TUBG1/TRIP13/NCAPH2/CDT1/HASPIN/KIF18A/BUB1/KIF18B/KIF23/CDCA5/SGO2/RACGAP1/UBE2C/CCNB1/TACC3/SPC24/KNTC1/MAD2L1/DSCC1/INCENP/TTK/CENPF/NCAPG/ESCO2/CENPW/SMC4/ANAPC1/ZWINT/KNL1/FAM83D/P3H4/NUF2/ECT2/BRIP1	68
BP	GO:0098813	nuclear chromosome segregation	60/813	287/18800	7.958e-25	1.74837e-21	1.58825e-21	CHMP4B/SLX4/EME1/PLK1/LCMT1/KIF22/NCAPH/KNSTRN/CDC6/DSN1/EME2/NSL1/EML4/PRC1/KIFC1/ZWILCH/FEN1/CENPX/NEK2/AURKB/SPC25/RMI2/SPAG5/BUB1B/CDC20/ANAPC11/SGO1/TUBG1/TRIP13/NCAPH2/CDT1/HASPIN/KIF18A/BUB1/KIF18B/KIF23/CDCA5/SGO2/RACGAP1/UBE2C/CCNB1/TACC3/SPC24/KNTC1/MAD2L1/DSCC1/INCENP/TTK/CENPF/NCAPG/ESCO2/SMC4/ANAPC1/ZWINT/KNL1/FAM83D/P3H4/NUF2/ECT2/BRIP1	60
BP	GO:0006260	DNA replication	58/813	280/18800	8.10401e-24	1.18697e-20	1.07826e-20	E4F1/DNAJA3/CHTF18/RBBP6/SLX4/EME1/RTF2/ORC6/ZNF830/WDR18/GINS3/TICRR/ACTL6A/CDC6/BLM/EME2/DBF4B/POLG/LIG1/RAD51/FEN1/CENPX/WRNIP1/HMGA1/ALYREF/DTL/RMI2/GMNN/PCLAF/FAM111B/TIMELESS/PRIM2/POLQ/GTPBP4/CDC45/RFC3/RFC4/CDT1/CCNA2/RFWD3/TRAIP/MCM5/MCM3/ATAD5/S100A11/DSCC1/CDK2AP1/GINS1/ESCO2/E2F8/RRM2/RNASEH2A/MCM10/CHEK1/PRIM1/GINS4/BRCA2/CDK1	58
BP	GO:0140014	mitotic nuclear division	59/813	293/18800	1.5148e-23	1.664e-20	1.51161e-20	UBE2I/PKMYT1/CHMP4B/PLK1/LCMT1/KIF22/NCAPH/KNSTRN/NDE1/PPP1R9B/CDC6/DSN1/NSL1/EML4/TPX2/PRC1/KIFC1/ZWILCH/MYBL2/NEK2/AURKB/AURKA/SPAG5/BUB1B/CDC20/ANAPC11/SGO1/TUBG1/TRIP13/NCAPH2/CDT1/RANBP1/HASPIN/KIF18A/BUB1/KIF18B/KIF23/CDCA5/SGO2/RACGAP1/UBE2C/CCNB1/MTBP/TACC3/KNTC1/MAD2L1/ANLN/DSCC1/TTK/CENPF/NCAPG/KIF11/SMC4/ANAPC1/ZWINT/CHEK1/UBE2S/NUF2/OBSL1	59
BP	GO:0000070	mitotic sister chromatid segregation	45/813	171/18800	3.16466e-23	2.78111e-20	2.5264e-20	CHMP4B/PLK1/LCMT1/KIF22/NCAPH/KNSTRN/CDC6/DSN1/NSL1/EML4/PRC1/KIFC1/ZWILCH/NEK2/AURKB/SPAG5/BUB1B/CDC20/ANAPC11/SGO1/TUBG1/TRIP13/NCAPH2/CDT1/HASPIN/KIF18A/BUB1/KIF18B/KIF23/CDCA5/SGO2/RACGAP1/UBE2C/CCNB1/TACC3/KNTC1/MAD2L1/DSCC1/TTK/CENPF/NCAPG/SMC4/ANAPC1/ZWINT/NUF2	45
BP	GO:0000819	sister chromatid segregation	48/813	205/18800	2.6252e-22	1.92252e-19	1.74645e-19	CHMP4B/PLK1/LCMT1/KIF22/NCAPH/KNSTRN/CDC6/DSN1/NSL1/EML4/PRC1/KIFC1/ZWILCH/FEN1/NEK2/AURKB/RMI2/SPAG5/BUB1B/CDC20/ANAPC11/SGO1/TUBG1/TRIP13/NCAPH2/CDT1/HASPIN/KIF18A/BUB1/KIF18B/KIF23/CDCA5/SGO2/RACGAP1/UBE2C/CCNB1/TACC3/KNTC1/MAD2L1/DSCC1/TTK/CENPF/NCAPG/ESCO2/SMC4/ANAPC1/ZWINT/NUF2	48
BP	GO:0006261	DNA-templated DNA replication	42/813	159/18800	7.91689e-22	4.35047e-19	3.95204e-19	DNAJA3/CHTF18/EME1/RTF2/ORC6/ZNF830/WDR18/GINS3/TICRR/CDC6/BLM/EME2/DBF4B/POLG/LIG1/RAD51/FEN1/CENPX/WRNIP1/HMGA1/ALYREF/GMNN/TIMELESS/PRIM2/POLQ/CDC45/RFC3/RFC4/CDT1/RFWD3/TRAIP/MCM5/MCM3/ATAD5/DSCC1/CDK2AP1/GINS1/E2F8/MCM10/PRIM1/GINS4/BRCA2	42
BP	GO:0000280	nuclear division	71/813	446/18800	8.15336e-22	4.35047e-19	3.95204e-19	UBE2I/PKMYT1/CHMP4B/SLX4/EME1/PLK1/LCMT1/KIF22/NCAPH/KNSTRN/MND1/NDE1/PPP1R9B/CDC6/DSN1/EME2/NSL1/EML4/TPX2/PRC1/KIFC1/ZWILCH/RAD51/CENPX/MYBL2/NEK2/AURKB/AURKA/SPAG5/BUB1B/CDC20/ANAPC11/SGO1/CCNB2/TUBG1/TRIP13/NCAPH2/CDT1/RANBP1/HASPIN/KIF18A/BUB1/KIF18B/KIF23/CDCA5/SGO2/RACGAP1/UBE2C/CCNB1/MTBP/TACC3/KNTC1/MAD2L1/ANLN/DSCC1/INCENP/TTK/CENPF/NCAPG/KIF11/SMC4/ANAPC1/ZWINT/CHEK1/UBE2S/TEX19/P3H4/N…	71
BP	GO:0048285	organelle fission	75/813	493/18800	8.91085e-22	4.35047e-19	3.95204e-19	UBE2I/PKMYT1/VPS35/CHMP4B/SLX4/MTFR2/EME1/PLK1/LCMT1/KIF22/NCAPH/KNSTRN/MND1/NDE1/PPP1R9B/CDC6/OPA1/DSN1/EME2/NSL1/EML4/TPX2/PRC1/KIFC1/ZWILCH/RAD51/CENPX/MYBL2/NEK2/AURKB/AURKA/SPAG5/BUB1B/CDC20/ANAPC11/SGO1/CCNB2/TUBG1/TRIP13/NCAPH2/CDT1/RANBP1/HASPIN/MTFP1/KIF18A/BUB1/KIF18B/KIF23/CDCA5/SGO2/RACGAP1/UBE2C/CCNB1/MTBP/TACC3/KNTC1/MAD2L1/ANLN/DSCC1/INCENP/TTK/CENPF/NCAPG/KIF11/SMC4/ANAPC1/ZWINT/C…	75
BP	GO:0051304	chromosome separation	25/813	97/18800	2.89416e-13	1.27169e-10	1.15523e-10	SLX4/EME1/PLK1/LCMT1/NCAPH/CDC6/EME2/ZWILCH/CENPX/AURKB/BUB1B/ANAPC11/TRIP13/NCAPH2/CDT1/BUB1/UBE2C/CCNB1/TACC3/KNTC1/MAD2L1/TTK/CENPF/ANAPC1/ZWINT	25
BP	GO:0051306	mitotic sister chromatid separation	20/813	68/18800	4.79217e-12	1.91425e-09	1.73894e-09	PLK1/LCMT1/CDC6/ZWILCH/AURKB/BUB1B/ANAPC11/TRIP13/NCAPH2/CDT1/BUB1/UBE2C/CCNB1/TACC3/KNTC1/MAD2L1/TTK/CENPF/ANAPC1/ZWINT	20
BP	GO:0007051	spindle organization	33/813	188/18800	5.6212e-12	2.0583e-09	1.86979e-09	MAPRE1/CHMP4B/RAE1/PLK1/DCTN1/KNSTRN/PKD1/EZR/TUBB/TPX2/PRC1/KIFC1/HAUS8/MYBL2/NEK2/AURKB/SPC25/AURKA/SPAG5/CDC20/TACC2/CCNB2/TUBG1/KIF23/RACGAP1/CCNB1/TACC3/PARP3/INCENP/TTK/KIF11/SAC3D1/NUF2	33
BP	GO:0051052	regulation of DNA metabolic process	56/813	472/18800	7.03756e-12	2.28293e-09	2.07385e-09	GFER/CHTF18/USP7/PARN/ACTB/RBBP6/PPP4C/SLX4/ZNF830/BAX/NUDT16L1/GINS3/TICRR/ACTL6A/CDC6/BLM/DBF4B/HMGB1/RAD51/DKC1/WRNIP1/ALYREF/NEK2/AURKB/MAGEF1/RMI2/GMNN/TIMELESS/RNF168/PRIM2/CCT5/POLQ/GTPBP4/HSP90AA1/NAT10/RFC3/RFC4/CDT1/H1-0/CCNA2/KPNA2/YEATS4/PARPBP/PARP3/ATAD5/S100A11/DSCC1/GINS1/ESCO2/E2F8/FGFR4/CHEK1/GINS4/TFDP1/BRCA2/CDK1	56
BP	GO:0007091	metaphase/anaphase transition of mitotic cell cycle	19/813	62/18800	7.27378e-12	2.28293e-09	2.07385e-09	PLK1/LCMT1/CDC6/ZWILCH/AURKB/BUB1B/ANAPC11/TRIP13/CDT1/BUB1/UBE2C/CCNB1/TACC3/KNTC1/MAD2L1/TTK/CENPF/ANAPC1/ZWINT	19
BP	GO:0044786	cell cycle DNA replication	16/813	43/18800	1.14681e-11	3.35937e-09	3.05171e-09	RTF2/ZNF830/GINS3/BLM/DBF4B/LIG1/RAD51/FEN1/GMNN/CDC45/CDT1/MCM3/ATAD5/GINS1/E2F8/BRCA2	16
BP	GO:0033045	regulation of sister chromatid segregation	20/813	72/18800	1.54604e-11	4.24581e-09	3.85696e-09	PLK1/LCMT1/CDC6/ZWILCH/AURKB/RMI2/BUB1B/ANAPC11/TRIP13/CDT1/BUB1/UBE2C/CCNB1/TACC3/KNTC1/MAD2L1/TTK/CENPF/ANAPC1/ZWINT	20
BP	GO:0010965	regulation of mitotic sister chromatid separation	19/813	65/18800	1.85147e-11	4.29748e-09	3.90389e-09	PLK1/LCMT1/CDC6/ZWILCH/AURKB/BUB1B/ANAPC11/TRIP13/CDT1/BUB1/UBE2C/CCNB1/TACC3/KNTC1/MAD2L1/TTK/CENPF/ANAPC1/ZWINT	19
BP	GO:0044784	metaphase/anaphase transition of cell cycle	19/813	65/18800	1.85147e-11	4.29748e-09	3.90389e-09	PLK1/LCMT1/CDC6/ZWILCH/AURKB/BUB1B/ANAPC11/TRIP13/CDT1/BUB1/UBE2C/CCNB1/TACC3/KNTC1/MAD2L1/TTK/CENPF/ANAPC1/ZWINT	19
BP	GO:0033260	nuclear DNA replication	15/813	38/18800	1.85826e-11	4.29748e-09	3.90389e-09	RTF2/ZNF830/GINS3/BLM/DBF4B/LIG1/RAD51/FEN1/GMNN/CDC45/CDT1/MCM3/ATAD5/GINS1/BRCA2	15
BP	GO:0090329	regulation of DNA-templated DNA replication	17/813	52/18800	2.89883e-11	6.36872e-09	5.78545e-09	CHTF18/ZNF830/GINS3/TICRR/BLM/DBF4B/WRNIP1/GMNN/TIMELESS/RFC3/RFC4/CDT1/DSCC1/GINS1/E2F8/GINS4/BRCA2	17
BP	GO:0000075	cell cycle checkpoint signaling	30/813	170/18800	4.51932e-11	9.37031e-09	8.51214e-09	EME1/PLK1/LCMT1/ZNF830/TICRR/CDC6/BLM/EME2/NSUN2/ZWILCH/E2F1/AURKB/DTL/BUB1B/TIMELESS/CDC45/TRIP13/CDT1/MDC1/RFWD3/BUB1/CCNB1/KNTC1/MAD2L1/TTK/CENPF/ZWINT/CHEK1/BRIP1/CDK1	30
BP	GO:0044772	mitotic cell cycle phase transition	52/813	440/18800	4.69155e-11	9.37031e-09	8.51214e-09	PKMYT1/CCNF/BRD7/CHMP4B/GSPT1/PLK1/LCMT1/ZNF830/CKS1B/PKD1/TFAP4/TICRR/PPP1R9B/CDC6/BLM/CALM2/CDK2AP2/ZWILCH/DBF4B/E2F1/AURKB/AURKA/DTL/BUB1B/ANAPC11/CDK4/CCNB2/TRIP13/CDT1/CCNA2/RFWD3/BUB1/CDCA5/UBE2C/CCNB1/MTBP/TACC3/ATAD5/KNTC1/RBL1/MAD2L1/ANLN/TTK/CENPF/RRM2/ANAPC1/ZWINT/CHEK1/UBE2S/TFDP1/CDC25A/CDK1	52
BP	GO:1901987	regulation of cell cycle phase transition	50/813	415/18800	5.59057e-11	1.06804e-08	9.70227e-09	BRD7/EME1/PLK1/LCMT1/ZNF830/PKD1/TFAP4/TICRR/PPP1R9B/CDC6/BLM/EME2/CDK2AP2/NSUN2/ZWILCH/DBF4B/E2F1/AURKB/AURKA/DTL/BUB1B/TIMELESS/ANAPC11/CDK4/CDC45/TRIP13/CDT1/MDC1/PAGR1/RFWD3/BUB1/CDCA5/UBE2C/CCNB1/MTBP/ATAD5/KNTC1/RBL1/MAD2L1/ANLN/TTK/CENPF/RRM2/ZWINT/CHEK1/FAM83D/TFDP1/CDC25A/BRIP1/CDK1	50
BP	GO:0006275	regulation of DNA replication	26/813	131/18800	5.98435e-11	1.09563e-08	9.95292e-09	CHTF18/RBBP6/ZNF830/GINS3/TICRR/ACTL6A/CDC6/BLM/DBF4B/WRNIP1/GMNN/TIMELESS/GTPBP4/RFC3/RFC4/CDT1/CCNA2/ATAD5/S100A11/DSCC1/GINS1/ESCO2/E2F8/GINS4/BRCA2/CDK1	26
BP	GO:0045839	negative regulation of mitotic nuclear division	16/813	48/18800	7.95866e-11	1.39881e-08	1.2707e-08	PLK1/LCMT1/ZWILCH/AURKB/BUB1B/TRIP13/CDT1/BUB1/CCNB1/MTBP/KNTC1/MAD2L1/TTK/CENPF/ZWINT/CHEK1	16
BP	GO:0022613	ribonucleoprotein complex biogenesis	52/813	448/18800	9.13322e-11	1.54351e-08	1.40215e-08	TBL3/TRAF7/TSR3/RPUSD1/NOP58/SNRPD3/DDX27/AATF/RSL1D1/PWP1/LUC7L/RPUSD2/MRPS11/FASTKD2/SNRPG/EIF2S2/RAMAC/ERAL1/HEATR3/EIF6/USP39/MRPS7/LSM6/LSM2/NGRN/SNRPC/WDR18/LTV1/LSG1/COIL/RRP15/NIFK/KRI1/ZNF622/EIF3CL/MRPL36/DKC1/RRP7A/WDR12/DDX18/LYAR/SLX9/GTPBP4/HSP90AA1/NAT10/RPL3L/RPP40/SRPK3/RPP25/SNRPE/SMN1/RIOK1	52
BP	GO:0007346	regulation of mitotic cell cycle	54/813	478/18800	1.09612e-10	1.78383e-08	1.62046e-08	PKMYT1/E4F1/BRD7/AATF/EME1/PLK1/LCMT1/ZNF830/CKS1B/PKD1/TFAP4/TICRR/PPP1R9B/CDC6/BLM/EME2/CDK2AP2/ZWILCH/DBF4B/TTLL12/E2F1/NEK2/AURKB/AURKA/DTL/IQGAP1/GMNN/BUB1B/ANAPC11/CDK4/TRIP13/CDT1/MDC1/RFWD3/BUB1/CDCA5/UBE2C/CCNB1/MTBP/ATAD5/KNTC1/RBL1/MAD2L1/ANLN/TTK/CENPF/RRM2/ZWINT/CHEK1/TFDP1/BRCA2/OBSL1/CDC25A/CDK1	54
BP	GO:1905818	regulation of chromosome separation	19/813	72/18800	1.32927e-10	2.08601e-08	1.89496e-08	PLK1/LCMT1/CDC6/ZWILCH/AURKB/BUB1B/ANAPC11/TRIP13/CDT1/BUB1/UBE2C/CCNB1/TACC3/KNTC1/MAD2L1/TTK/CENPF/ANAPC1/ZWINT	19
BP	GO:0033044	regulation of chromosome organization	33/813	212/18800	1.57498e-10	2.38637e-08	2.16782e-08	USP7/PARN/SLX4/PLK1/LCMT1/NCAPH/ACTL6A/CDC6/ZWILCH/DKC1/FEN1/NEK2/AURKB/RMI2/BUB1B/CCT5/ANAPC11/NAT10/TRIP13/CDT1/BUB1/CDCA5/UBE2C/CCNB1/TACC3/KNTC1/MAD2L1/TTK/CENPF/NCAPG/SMC4/ANAPC1/ZWINT	33
BP	GO:0008608	attachment of spindle microtubules to kinetochore	14/813	37/18800	1.73042e-10	2.53449e-08	2.30237e-08	KNSTRN/EML4/NEK2/AURKB/SPC25/SPAG5/SGO1/CDT1/RACGAP1/CCNB1/SPC24/KNL1/NUF2/ECT2	14
BP	GO:0006310	DNA recombination	42/813	324/18800	2.05961e-10	2.91933e-08	2.65196e-08	ACTB/HROB/PPP4C/SLX4/EME1/PALB2/MND1/ACTL6A/BLM/EME2/HMGB1/RAD51/EXO1/FEN1/CENPX/ALYREF/MAGEF1/RMI2/HSPD1/TIMELESS/RNF168/POLQ/CDC45/HMGB2/TRIP13/H1-0/PAGR1/RFWD3/KPNA2/YEATS4/MCM5/HMGB3/PARPBP/PARP3/MCM3/ATAD5/UNG/CHEK1/TEX19/GINS4/BRCA2/BRIP1	42
BP	GO:0007094	mitotic spindle assembly checkpoint signaling	14/813	38/18800	2.63143e-10	3.40074e-08	3.08929e-08	PLK1/LCMT1/ZWILCH/AURKB/BUB1B/TRIP13/CDT1/BUB1/CCNB1/KNTC1/MAD2L1/TTK/CENPF/ZWINT	14
BP	GO:0071173	spindle assembly checkpoint signaling	14/813	38/18800	2.63143e-10	3.40074e-08	3.08929e-08	PLK1/LCMT1/ZWILCH/AURKB/BUB1B/TRIP13/CDT1/BUB1/CCNB1/KNTC1/MAD2L1/TTK/CENPF/ZWINT	14
BP	GO:0071174	mitotic spindle checkpoint signaling	14/813	38/18800	2.63143e-10	3.40074e-08	3.08929e-08	PLK1/LCMT1/ZWILCH/AURKB/BUB1B/TRIP13/CDT1/BUB1/CCNB1/KNTC1/MAD2L1/TTK/CENPF/ZWINT	14
BP	GO:0007093	mitotic cell cycle checkpoint signaling	25/813	130/18800	2.83671e-10	3.56128e-08	3.23513e-08	EME1/PLK1/LCMT1/ZNF830/TICRR/CDC6/BLM/EME2/ZWILCH/AURKB/DTL/BUB1B/TRIP13/CDT1/MDC1/RFWD3/BUB1/CCNB1/KNTC1/MAD2L1/TTK/CENPF/ZWINT/CHEK1/CDK1	25
BP	GO:1902850	microtubule cytoskeleton organization involved in mitosis	27/813	151/18800	3.10292e-10	3.78728e-08	3.44043e-08	CHMP4B/RAE1/PLK1/DCTN1/PKD1/NDE1/TPX2/PRC1/KIFC1/MYBL2/NEK2/AURKB/SPC25/AURKA/CDC20/TACC2/TUBG1/KIF23/RACGAP1/CCNB1/TACC3/PARP3/MAD2L1/TTK/KIF11/SAPCD2/NUF2	27
BP	GO:0030071	regulation of mitotic metaphase/anaphase transition	17/813	60/18800	3.69331e-10	4.38606e-08	3.98436e-08	PLK1/LCMT1/CDC6/ZWILCH/AURKB/BUB1B/ANAPC11/TRIP13/CDT1/BUB1/UBE2C/CCNB1/KNTC1/MAD2L1/TTK/CENPF/ZWINT	17
BP	GO:0031577	spindle checkpoint signaling	14/813	39/18800	3.94265e-10	4.55895e-08	4.14142e-08	PLK1/LCMT1/ZWILCH/AURKB/BUB1B/TRIP13/CDT1/BUB1/CCNB1/KNTC1/MAD2L1/TTK/CENPF/ZWINT	14
BP	GO:1901990	regulation of mitotic cell cycle phase transition	41/813	321/18800	5.33869e-10	6.01493e-08	5.46405e-08	BRD7/PLK1/LCMT1/ZNF830/PKD1/TFAP4/TICRR/PPP1R9B/CDC6/BLM/CDK2AP2/ZWILCH/DBF4B/E2F1/AURKB/AURKA/DTL/BUB1B/ANAPC11/CDK4/TRIP13/CDT1/RFWD3/BUB1/CDCA5/UBE2C/CCNB1/MTBP/ATAD5/KNTC1/RBL1/MAD2L1/ANLN/TTK/CENPF/RRM2/ZWINT/CHEK1/TFDP1/CDC25A/CDK1	41
BP	GO:0007052	mitotic spindle organization	24/813	124/18800	5.60948e-10	6.16202e-08	5.59768e-08	CHMP4B/RAE1/PLK1/DCTN1/PKD1/TPX2/PRC1/KIFC1/MYBL2/NEK2/AURKB/SPC25/AURKA/CDC20/TACC2/TUBG1/KIF23/RACGAP1/CCNB1/TACC3/PARP3/TTK/KIF11/NUF2	24
BP	GO:0045841	negative regulation of mitotic metaphase/anaphase transition	14/813	40/18800	5.82571e-10	6.24346e-08	5.67166e-08	PLK1/LCMT1/ZWILCH/AURKB/BUB1B/TRIP13/CDT1/BUB1/CCNB1/KNTC1/MAD2L1/TTK/CENPF/ZWINT	14
BP	GO:0051784	negative regulation of nuclear division	16/813	55/18800	7.90268e-10	8.26771e-08	7.51051e-08	PLK1/LCMT1/ZWILCH/AURKB/BUB1B/TRIP13/CDT1/BUB1/CCNB1/MTBP/KNTC1/MAD2L1/TTK/CENPF/ZWINT/CHEK1	16
BP	GO:1902099	regulation of metaphase/anaphase transition of cell cycle	17/813	63/18800	8.55172e-10	8.73867e-08	7.93834e-08	PLK1/LCMT1/CDC6/ZWILCH/AURKB/BUB1B/ANAPC11/TRIP13/CDT1/BUB1/UBE2C/CCNB1/KNTC1/MAD2L1/TTK/CENPF/ZWINT	17
BP	GO:0032543	mitochondrial translation	18/813	72/18800	1.06529e-09	1.06384e-07	9.66406e-08	MRPS34/GATB/EARS2/MRPS18B/MRPS11/FASTKD2/CDK5RAP1/IARS2/COA3/TACO1/MRPS7/MRPL47/NGRN/MRPS18A/MTIF2/TUFM/SHMT2/MRPS24	18
BP	GO:1902100	negative regulation of metaphase/anaphase transition of cell cycle	14/813	42/18800	1.2241e-09	1.19527e-07	1.0858e-07	PLK1/LCMT1/ZWILCH/AURKB/BUB1B/TRIP13/CDT1/BUB1/CCNB1/KNTC1/MAD2L1/TTK/CENPF/ZWINT	14
BP	GO:0071897	DNA biosynthetic process	30/813	194/18800	1.26139e-09	1.2049e-07	1.09455e-07	GFER/TELO2/CHTF18/PARN/HROB/PHB1/TK1/GINS3/POLG/LIG1/DKC1/WRNIP1/NEK2/AURKB/DTL/PCLAF/CCT5/POLQ/HSP90AA1/NAT10/RFC3/RFC4/PARP3/DSCC1/CENPF/GINS1/FGFR4/CHEK1/GINS4/TFDP1	30
BP	GO:0051983	regulation of chromosome segregation	20/813	91/18800	1.48826e-09	1.39137e-07	1.26394e-07	PLK1/LCMT1/CDC6/ZWILCH/AURKB/RMI2/BUB1B/ANAPC11/TRIP13/CDT1/BUB1/UBE2C/CCNB1/TACC3/KNTC1/MAD2L1/TTK/CENPF/ANAPC1/ZWINT	20
BP	GO:0033046	negative regulation of sister chromatid segregation	14/813	43/18800	1.74329e-09	1.53201e-07	1.3917e-07	PLK1/LCMT1/ZWILCH/AURKB/BUB1B/TRIP13/CDT1/BUB1/CCNB1/KNTC1/MAD2L1/TTK/CENPF/ZWINT	14
BP	GO:0033048	negative regulation of mitotic sister chromatid segregation	14/813	43/18800	1.74329e-09	1.53201e-07	1.3917e-07	PLK1/LCMT1/ZWILCH/AURKB/BUB1B/TRIP13/CDT1/BUB1/CCNB1/KNTC1/MAD2L1/TTK/CENPF/ZWINT	14
BP	GO:2000816	negative regulation of mitotic sister chromatid separation	14/813	43/18800	1.74329e-09	1.53201e-07	1.3917e-07	PLK1/LCMT1/ZWILCH/AURKB/BUB1B/TRIP13/CDT1/BUB1/CCNB1/KNTC1/MAD2L1/TTK/CENPF/ZWINT	14
BP	GO:0140053	mitochondrial gene expression	21/813	104/18800	2.99426e-09	2.57976e-07	2.3435e-07	MRPS34/GATB/EARS2/MRPS18B/MRPS11/FASTKD2/CDK5RAP1/IARS2/COA3/TACO1/MRPS7/MRPL47/NGRN/MRPS18A/MTIF2/TUFM/SHMT2/PNPT1/CHCHD10/MRPS24/MRPL12	21
BP	GO:0006270	DNA replication initiation	13/813	38/18800	3.33828e-09	2.78608e-07	2.53091e-07	ORC6/GINS3/TICRR/CDC6/WRNIP1/GMNN/PRIM2/CDC45/CDT1/MCM5/MCM3/MCM10/PRIM1	13
BP	GO:0051985	negative regulation of chromosome segregation	14/813	45/18800	3.42394e-09	2.78608e-07	2.53091e-07	PLK1/LCMT1/ZWILCH/AURKB/BUB1B/TRIP13/CDT1/BUB1/CCNB1/KNTC1/MAD2L1/TTK/CENPF/ZWINT	14
BP	GO:1905819	negative regulation of chromosome separation	14/813	45/18800	3.42394e-09	2.78608e-07	2.53091e-07	PLK1/LCMT1/ZWILCH/AURKB/BUB1B/TRIP13/CDT1/BUB1/CCNB1/KNTC1/MAD2L1/TTK/CENPF/ZWINT	14
BP	GO:0032392	DNA geometric change	20/813	96/18800	4.01394e-09	3.20677e-07	2.91308e-07	CHTF18/GINS3/BLM/HMGB1/RAD51/WRNIP1/HMGA1/ERCC6L/POLQ/CDC45/HMGB2/RFC3/RFC4/MCM5/HMGB3/MCM3/DSCC1/GINS1/GINS4/BRIP1	20
BP	GO:0042254	ribosome biogenesis	38/813	304/18800	4.22137e-09	3.31227e-07	3.00892e-07	TBL3/TRAF7/TSR3/RPUSD1/NOP58/DDX27/AATF/RSL1D1/PWP1/RPUSD2/MRPS11/FASTKD2/ERAL1/HEATR3/EIF6/MRPS7/LSM6/NGRN/WDR18/LTV1/LSG1/RRP15/NIFK/KRI1/ZNF622/MRPL36/DKC1/RRP7A/WDR12/DDX18/LYAR/SLX9/GTPBP4/NAT10/RPL3L/RPP40/RPP25/RIOK1	38
BP	GO:0033047	regulation of mitotic sister chromatid segregation	14/813	46/18800	4.72744e-09	3.64427e-07	3.31052e-07	PLK1/LCMT1/ZWILCH/AURKB/BUB1B/TRIP13/CDT1/BUB1/CCNB1/KNTC1/MAD2L1/TTK/CENPF/ZWINT	14
BP	GO:0007088	regulation of mitotic nuclear division	21/813	111/18800	1.02223e-08	7.74425e-07	7.035e-07	PKMYT1/PLK1/LCMT1/ZWILCH/NEK2/AURKB/AURKA/BUB1B/ANAPC11/TRIP13/CDT1/BUB1/CCNB1/MTBP/KNTC1/MAD2L1/TTK/CENPF/ZWINT/CHEK1/OBSL1	21
BP	GO:0010948	negative regulation of cell cycle process	37/813	301/18800	1.06415e-08	7.92518e-07	7.19936e-07	CCNF/BRD7/EME1/PLK1/LCMT1/ZNF830/TICRR/CDC6/BLM/EME2/CDK2AP2/NSUN2/ZWILCH/E2F1/NEK2/AURKB/DTL/BUB1B/TIMELESS/CDC45/TRIP13/CDT1/MDC1/RFWD3/BUB1/CCNB1/MTBP/KNTC1/RBL1/MAD2L1/TTK/CENPF/E2F8/ZWINT/CHEK1/BRIP1/CDK1	37
BP	GO:0071103	DNA conformation change	20/813	103/18800	1.43915e-08	1.05394e-06	9.57415e-07	CHTF18/GINS3/BLM/HMGB1/RAD51/WRNIP1/HMGA1/ERCC6L/POLQ/CDC45/HMGB2/RFC3/RFC4/MCM5/HMGB3/MCM3/DSCC1/GINS1/GINS4/BRIP1	20
BP	GO:1901988	negative regulation of cell cycle phase transition	33/813	255/18800	1.88781e-08	1.35984e-06	1.2353e-06	BRD7/EME1/PLK1/LCMT1/ZNF830/TICRR/CDC6/BLM/EME2/CDK2AP2/NSUN2/ZWILCH/E2F1/AURKB/DTL/BUB1B/TIMELESS/CDC45/TRIP13/CDT1/MDC1/RFWD3/BUB1/CCNB1/KNTC1/RBL1/MAD2L1/TTK/CENPF/ZWINT/CHEK1/BRIP1/CDK1	33
BP	GO:1903046	meiotic cell cycle process	29/813	207/18800	2.34485e-08	1.63843e-06	1.48837e-06	SLX4/EME1/PLK1/NCAPH/MND1/EME2/NSUN2/RAD51/CENPX/AURKA/BUB1B/CDC20/SGO1/CCNB2/TUBG1/TRIP13/NCAPH2/KIF18A/BUB1/SGO2/INCENP/TTK/SMC4/TEX19/P3H4/NUF2/BRCA2/CDC25A/BRIP1	29
BP	GO:0140694	non-membrane-bounded organelle assembly	42/813	379/18800	2.34913e-08	1.63843e-06	1.48837e-06	TRAF7/MAPRE1/CHMP4B/MRPS11/PLK1/FASTKD2/EDC3/ERAL1/EIF6/MRPS7/NGRN/PLK4/EZR/TUBB/TPX2/PRC1/KIFC1/HAUS8/LSM3/CENPX/RRP7A/MYBL2/NEK2/AURKB/AURKA/SPAG5/CDC20/RPL3L/CCNB2/LDAF1/GRB7/KIF23/RACGAP1/KNTC1/ANLN/INCENP/CENPF/CENPW/KIF11/CCDC78/SAC3D1/OBSL1	42
BP	GO:1902969	mitotic DNA replication	8/813	14/18800	2.8159e-08	1.93329e-06	1.75623e-06	RTF2/GINS3/LIG1/RAD51/CDC45/MCM3/GINS1/BRCA2	8
BP	GO:0034501	protein localization to kinetochore	9/813	19/18800	3.16401e-08	2.10647e-06	1.91355e-06	ZWILCH/AURKB/CDT1/HASPIN/MTBP/KNTC1/TTK/KNL1/CDK1	9
BP	GO:1903083	protein localization to condensed chromosome	9/813	19/18800	3.16401e-08	2.10647e-06	1.91355e-06	ZWILCH/AURKB/CDT1/HASPIN/MTBP/KNTC1/TTK/KNL1/CDK1	9
BP	GO:0071459	protein localization to chromosome, centromeric region	10/813	25/18800	3.91768e-08	2.5693e-06	2.33399e-06	ZWILCH/AURKB/JARID2/CDT1/HASPIN/MTBP/KNTC1/TTK/KNL1/CDK1	10
BP	GO:0045786	negative regulation of cell cycle	42/813	387/18800	4.2721e-08	2.76053e-06	2.50771e-06	CCNF/BRD7/EME1/PLK1/LCMT1/CDK5RAP1/ZNF830/TFAP4/TICRR/CDC6/BLM/EME2/CDK2AP2/NSUN2/ZWILCH/E2F1/NEK2/AURKB/DTL/GMNN/BUB1B/TIMELESS/CDC45/TRIP13/CDT1/MDC1/RFWD3/BUB1/CCNB1/MTBP/KNTC1/RBL1/MAD2L1/TTK/CENPF/E2F8/NUPR1/ZWINT/CHEK1/IPO5/BRIP1/CDK1	42
BP	GO:0034502	protein localization to chromosome	18/813	93/18800	7.96479e-08	5.07207e-06	4.60755e-06	SGF29/PLK1/ZWILCH/DKC1/AURKB/CCT5/JARID2/CDT1/HASPIN/CDCA5/MTBP/PARP3/KNTC1/TTK/ESCO2/KNL1/BRCA2/CDK1	18
BP	GO:0006302	double-strand break repair	33/813	273/18800	9.91191e-08	6.22185e-06	5.65202e-06	ACTB/CIB1/PPP4C/SLX4/EME1/PALB2/NUDT16L1/ACTL6A/BLM/EME2/HMGB1/RAD51/FEN1/MAGEF1/RMI2/TIMELESS/RNF168/POLQ/CDC45/HMGB2/TRIP13/RFWD3/CDCA5/YEATS4/MCM5/PARPBP/PARP3/MCM3/ESCO2/CHEK1/GINS4/BRCA2/BRIP1	33
BP	GO:0051783	regulation of nuclear division	22/813	139/18800	1.31849e-07	8.10868e-06	7.36605e-06	PKMYT1/PLK1/LCMT1/ZWILCH/NEK2/AURKB/AURKA/BUB1B/CDC20/ANAPC11/TRIP13/CDT1/BUB1/CCNB1/MTBP/KNTC1/MAD2L1/TTK/CENPF/ZWINT/CHEK1/OBSL1	22
BP	GO:0051054	positive regulation of DNA metabolic process	32/813	263/18800	1.32869e-07	8.10868e-06	7.36605e-06	GFER/CHTF18/USP7/PARN/ACTB/SLX4/BAX/GINS3/ACTL6A/DBF4B/HMGB1/RAD51/DKC1/NEK2/AURKB/TIMELESS/RNF168/PRIM2/CCT5/HSP90AA1/RFC3/RFC4/CDT1/YEATS4/PARP3/ATAD5/DSCC1/GINS1/E2F8/FGFR4/GINS4/CDK1	32
BP	GO:0006268	DNA unwinding involved in DNA replication	9/813	22/18800	1.5151e-07	9.11968e-06	8.28446e-06	GINS3/BLM/RAD51/HMGA1/CDC45/MCM5/MCM3/GINS1/GINS4	9
BP	GO:0140013	meiotic nuclear division	26/813	188/18800	1.60981e-07	9.55882e-06	8.68338e-06	SLX4/EME1/PLK1/NCAPH/MND1/EME2/RAD51/CENPX/AURKA/BUB1B/CDC20/SGO1/CCNB2/TRIP13/NCAPH2/KIF18A/BUB1/SGO2/INCENP/TTK/SMC4/TEX19/P3H4/NUF2/BRCA2/BRIP1	26
BP	GO:0051321	meiotic cell cycle	32/813	266/18800	1.72766e-07	1.01218e-05	9.19478e-06	PKMYT1/SLX4/EME1/PLK1/NCAPH/MND1/EME2/NSUN2/RAD51/EXO1/CENPX/NEK2/AURKA/BUB1B/CDC20/SGO1/CCNB2/TUBG1/TRIP13/NCAPH2/KIF18A/BUB1/SGO2/INCENP/TTK/SMC4/TEX19/P3H4/NUF2/BRCA2/CDC25A/BRIP1	32
BP	GO:0000079	regulation of cyclin-dependent protein serine/threonine kinase activity	18/813	98/18800	1.83615e-07	1.06158e-05	9.6436e-06	PKMYT1/CCNF/ACTB/PLK1/CDK5RAP1/CKS1B/PKD1/CNPPD1/TFAP4/CDC6/BLM/CCNYL1/GTPBP4/CCNB2/CCNA2/CCNB1/IPO5/CDC25A	18
BP	GO:0051225	spindle assembly	20/813	121/18800	2.36226e-07	1.34802e-05	1.22456e-05	MAPRE1/CHMP4B/PLK1/TUBB/TPX2/PRC1/KIFC1/HAUS8/MYBL2/NEK2/AURKB/AURKA/SPAG5/CDC20/CCNB2/KIF23/RACGAP1/INCENP/KIF11/SAC3D1	20
BP	GO:0032508	DNA duplex unwinding	17/813	90/18800	2.63519e-07	1.48449e-05	1.34854e-05	CHTF18/GINS3/BLM/RAD51/WRNIP1/HMGA1/ERCC6L/POLQ/CDC45/RFC3/RFC4/MCM5/MCM3/DSCC1/GINS1/GINS4/BRIP1	17
BP	GO:1904029	regulation of cyclin-dependent protein kinase activity	18/813	101/18800	2.94815e-07	1.63977e-05	1.48959e-05	PKMYT1/CCNF/ACTB/PLK1/CDK5RAP1/CKS1B/PKD1/CNPPD1/TFAP4/CDC6/BLM/CCNYL1/GTPBP4/CCNB2/CCNA2/CCNB1/IPO5/CDC25A	18
BP	GO:0045930	negative regulation of mitotic cell cycle	29/813	234/18800	3.46541e-07	1.90338e-05	1.72906e-05	BRD7/EME1/PLK1/LCMT1/ZNF830/TICRR/CDC6/BLM/EME2/CDK2AP2/ZWILCH/AURKB/DTL/BUB1B/TRIP13/CDT1/MDC1/RFWD3/BUB1/CCNB1/MTBP/KNTC1/RBL1/MAD2L1/TTK/CENPF/ZWINT/CHEK1/CDK1	29
BP	GO:1901991	negative regulation of mitotic cell cycle phase transition	25/813	183/18800	3.52007e-07	1.90953e-05	1.73464e-05	BRD7/PLK1/LCMT1/ZNF830/TICRR/CDC6/BLM/CDK2AP2/ZWILCH/AURKB/DTL/BUB1B/TRIP13/CDT1/RFWD3/BUB1/CCNB1/KNTC1/RBL1/MAD2L1/TTK/CENPF/ZWINT/CHEK1/CDK1	25
BP	GO:0051988	regulation of attachment of spindle microtubules to kinetochore	7/813	13/18800	3.76496e-07	1.96943e-05	1.78906e-05	KNSTRN/NEK2/AURKB/SPAG5/RACGAP1/CCNB1/ECT2	7
BP	GO:1900262	regulation of DNA-directed DNA polymerase activity	7/813	13/18800	3.76496e-07	1.96943e-05	1.78906e-05	CHTF18/GINS3/RFC3/RFC4/DSCC1/GINS1/GINS4	7
BP	GO:1900264	positive regulation of DNA-directed DNA polymerase activity	7/813	13/18800	3.76496e-07	1.96943e-05	1.78906e-05	CHTF18/GINS3/RFC3/RFC4/DSCC1/GINS1/GINS4	7
BP	GO:2000573	positive regulation of DNA biosynthetic process	15/813	73/18800	4.2437e-07	2.19375e-05	1.99283e-05	GFER/CHTF18/PARN/GINS3/DKC1/NEK2/AURKB/CCT5/HSP90AA1/RFC3/RFC4/DSCC1/GINS1/FGFR4/GINS4	15
BP	GO:0051310	metaphase plate congression	14/813	65/18800	5.59543e-07	2.85888e-05	2.59705e-05	CHMP4B/KIF22/EML4/KIFC1/AURKB/SPAG5/CDT1/KIF18A/CDCA5/CCNB1/INCENP/CENPF/FAM83D/NUF2	14
BP	GO:0045132	meiotic chromosome segregation	17/813	96/18800	6.89167e-07	3.48069e-05	3.16191e-05	SLX4/EME1/PLK1/NCAPH/EME2/CENPX/BUB1B/SGO1/TRIP13/NCAPH2/BUB1/SGO2/TTK/SMC4/P3H4/NUF2/BRIP1	17
BP	GO:2000278	regulation of DNA biosynthetic process	19/813	119/18800	8.16059e-07	4.07473e-05	3.70155e-05	GFER/CHTF18/PARN/GINS3/DKC1/NEK2/AURKB/CCT5/HSP90AA1/NAT10/RFC3/RFC4/PARP3/DSCC1/GINS1/FGFR4/CHEK1/GINS4/TFDP1	19
BP	GO:2001251	negative regulation of chromosome organization	16/813	89/18800	1.18353e-06	5.84316e-05	5.30802e-05	SLX4/PLK1/LCMT1/ZWILCH/AURKB/BUB1B/NAT10/TRIP13/CDT1/BUB1/CCNB1/KNTC1/MAD2L1/TTK/CENPF/ZWINT	16
BP	GO:0051303	establishment of chromosome localization	15/813	81/18800	1.72171e-06	8.40576e-05	7.63593e-05	CHMP4B/KIF22/NDE1/EML4/KIFC1/AURKB/SPAG5/CDT1/KIF18A/CDCA5/CCNB1/INCENP/CENPF/FAM83D/NUF2	15
BP	GO:0050000	chromosome localization	15/813	83/18800	2.37303e-06	0.00011418	0.000103723	CHMP4B/KIF22/NDE1/EML4/KIFC1/AURKB/SPAG5/CDT1/KIF18A/CDCA5/CCNB1/INCENP/CENPF/FAM83D/NUF2	15
BP	GO:0000725	recombinational repair	22/813	164/18800	2.39067e-06	0.00011418	0.000103723	ACTB/HROB/PPP4C/SLX4/PALB2/ACTL6A/BLM/RAD51/FEN1/MAGEF1/RMI2/TIMELESS/POLQ/CDC45/RFWD3/YEATS4/MCM5/PARPBP/MCM3/CHEK1/GINS4/BRCA2	22
BP	GO:0045787	positive regulation of cell cycle	34/813	329/18800	2.50852e-06	0.000118521	0.000107666	CKS1B/PKD1/PLK4/CDC6/DBF4B/FEN1/CCNYL1/AURKB/AURKA/DTL/SPAG5/ANAPC11/CDK4/CDT1/RANBP1/PAGR1/KIF23/CDCA5/RACGAP1/UBE2C/CCNB1/MTBP/ATAD5/MAD2L1/E2F8/RRM2/NUPR1/CHEK1/FAM83D/TFDP1/BRCA2/ECT2/CDC25A/CDK1	34
BP	GO:0090068	positive regulation of cell cycle process	28/813	247/18800	3.28439e-06	0.000153528	0.000139467	PLK4/CDC6/DBF4B/FEN1/AURKB/AURKA/DTL/SPAG5/ANAPC11/CDK4/CDT1/RANBP1/PAGR1/KIF23/CDCA5/RACGAP1/UBE2C/CCNB1/MTBP/ATAD5/MAD2L1/E2F8/RRM2/FAM83D/TFDP1/ECT2/CDC25A/CDK1	28
BP	GO:0044839	cell cycle G2/M phase transition	21/813	155/18800	3.43479e-06	0.000158868	0.000144318	PKMYT1/PLK1/LCMT1/ZNF830/TICRR/CDC6/BLM/CALM2/DBF4B/AURKB/AURKA/DTL/CDK4/CCNB2/CCNA2/CCNB1/ATAD5/CENPF/CHEK1/CDC25A/CDK1	21
BP	GO:0007098	centrosome cycle	19/813	131/18800	3.59933e-06	0.000164744	0.000149656	CCNF/CHMP4B/PLK1/DCTN1/NDE1/PLK4/HAUS8/NEK2/AURKA/PCLAF/SGO1/NAT10/RANBP1/KIF11/CHEK1/FES/SAC3D1/BRCA2/CDK1	19
BP	GO:0016072	rRNA metabolic process	29/813	264/18800	4.13633e-06	0.000187372	0.000170211	TBL3/TSR3/RPUSD1/NOP58/DDX27/RSL1D1/PWP1/RPUSD2/MRPS11/NCL/EIF6/LSM6/WDR18/RRP15/NIFK/KRI1/SMARCB1/GTF3C6/DKC1/RRP7A/WDR12/DDX18/LYAR/SLX9/GTPBP4/NAT10/RPP40/RPP25/RIOK1	29
BP	GO:0031023	microtubule organizing center organization	20/813	145/18800	4.42506e-06	0.000198405	0.000180235	CCNF/CHMP4B/PLK1/DCTN1/NDE1/PLK4/HAUS8/NEK2/AURKA/PCLAF/SGO1/NAT10/RANBP1/KIF11/CCDC78/CHEK1/FES/SAC3D1/BRCA2/CDK1	20
BP	GO:0010639	negative regulation of organelle organization	35/813	356/18800	5.51062e-06	0.000244583	0.000222183	CCNF/TSC2/MAPRE1/CIB1/CHMP4B/SLX4/PLK1/LCMT1/F11R/PFN1/TMSB10/OPA1/TPX2/ZWILCH/ARPIN/AURKB/TMEM14A/BUB1B/NAT10/TRIP13/CDT1/BUB1/PPIF/TSPO/CCNB1/MTBP/KNTC1/MAD2L1/MPV17L/TTK/CENPF/MYADM/NUPR1/ZWINT/CHEK1	35
BP	GO:0006364	rRNA processing	26/813	226/18800	5.58026e-06	0.000245197	0.000222741	TBL3/TSR3/RPUSD1/NOP58/DDX27/RSL1D1/PWP1/RPUSD2/MRPS11/EIF6/LSM6/WDR18/RRP15/NIFK/KRI1/DKC1/RRP7A/WDR12/DDX18/LYAR/SLX9/GTPBP4/NAT10/RPP40/RPP25/RIOK1	26
BP	GO:0008156	negative regulation of DNA replication	9/813	32/18800	5.78419e-06	0.000251641	0.000228595	ZNF830/CDC6/BLM/GMNN/TIMELESS/GTPBP4/CDT1/S100A11/BRCA2	9
BP	GO:0045005	DNA-templated DNA replication maintenance of fidelity	11/813	49/18800	5.9694e-06	0.000257153	0.000233601	EME1/ZNF830/BLM/EME2/RAD51/CENPX/ALYREF/TIMELESS/RFWD3/TRAIP/BRCA2	11
BP	GO:0000724	double-strand break repair via homologous recombination	21/813	162/18800	6.96275e-06	0.000297032	0.000269829	ACTB/PPP4C/SLX4/PALB2/ACTL6A/BLM/RAD51/FEN1/MAGEF1/RMI2/TIMELESS/POLQ/CDC45/RFWD3/YEATS4/MCM5/PARPBP/MCM3/CHEK1/GINS4/BRCA2	21
BP	GO:0000086	G2/M transition of mitotic cell cycle	19/813	140/18800	9.68266e-06	0.000409092	0.000371626	PKMYT1/PLK1/LCMT1/ZNF830/TICRR/CDC6/BLM/CALM2/DBF4B/AURKB/AURKA/DTL/CDK4/CCNA2/CCNB1/CENPF/CHEK1/CDC25A/CDK1	19
BP	GO:0071824	protein-DNA complex subunit organization	26/813	237/18800	1.3153e-05	0.000550421	0.000500012	NAA60/SMARCD2/OIP5/PSME4/SRCAP/SMARCB1/HMGB1/RAD51/CENPX/HMGA1/HJURP/H4C9/GMNN/H2BC12/CDC45/HMGB2/CDT1/H1-0/CENPO/H4C14/ASF1B/H3C6/KNTC1/CENPF/CENPW/H2BC7	26
BP	GO:0007062	sister chromatid cohesion	12/813	63/18800	1.37786e-05	0.000571162	0.000518853	PLK1/KIF22/FEN1/BUB1B/CDC20/SGO1/HASPIN/BUB1/CDCA5/SGO2/DSCC1/ESCO2	12
BP	GO:0006177	GMP biosynthetic process	6/813	14/18800	1.43065e-05	0.000582064	0.000528756	ATIC/IMPDH1/GMPS/APRT/ADA/PAICS	6
BP	GO:0007100	mitotic centrosome separation	6/813	14/18800	1.43065e-05	0.000582064	0.000528756	NDE1/NEK2/AURKA/RANBP1/KIF11/CHEK1	6
BP	GO:0042274	ribosomal small subunit biogenesis	13/813	74/18800	1.52774e-05	0.000615863	0.000559459	TBL3/TSR3/MRPS11/ERAL1/MRPS7/LSM6/LTV1/KRI1/RRP7A/SLX9/NAT10/RPP40/RIOK1	13
BP	GO:1902749	regulation of cell cycle G2/M phase transition	16/813	108/18800	1.58619e-05	0.00063361	0.000575581	PLK1/ZNF830/TICRR/CDC6/BLM/DBF4B/AURKB/AURKA/DTL/CDK4/CCNB1/ATAD5/CENPF/CHEK1/CDC25A/CDK1	16
BP	GO:0006457	protein folding	24/813	212/18800	1.66066e-05	0.00065738	0.000597175	TRAP1/DNAJA3/DNAJA2/MESD/DNAJB11/TXNDC9/DNAJC19/SDF2/PDCL3/HSPE1/UNC45A/PPIL1/RANBP2/SDF2L1/HSPD1/P4HB/CCT5/HSPBP1/HSP90AA1/PTGES3L/HSPH1/PDIA6/PPIF/UNC45B	24
BP	GO:0010389	regulation of G2/M transition of mitotic cell cycle	15/813	97/18800	1.71943e-05	0.000674569	0.00061279	PLK1/ZNF830/TICRR/CDC6/BLM/DBF4B/AURKB/AURKA/DTL/CDK4/CCNB1/CENPF/CHEK1/CDC25A/CDK1	15
BP	GO:0051053	negative regulation of DNA metabolic process	19/813	148/18800	2.163e-05	0.00084108	0.00076405	SLX4/ZNF830/NUDT16L1/CDC6/BLM/MAGEF1/RMI2/GMNN/TIMELESS/POLQ/GTPBP4/NAT10/CDT1/H1-0/PARPBP/PARP3/S100A11/CHEK1/BRCA2	19
BP	GO:0031570	DNA integrity checkpoint signaling	17/813	123/18800	2.21122e-05	0.00084488	0.000767502	EME1/PLK1/ZNF830/TICRR/CDC6/BLM/EME2/E2F1/DTL/TIMELESS/CDC45/CDT1/MDC1/RFWD3/CHEK1/BRIP1/CDK1	17
BP	GO:1901989	positive regulation of cell cycle phase transition	17/813	123/18800	2.21122e-05	0.00084488	0.000767502	CDC6/DBF4B/DTL/ANAPC11/CDK4/CDT1/PAGR1/CDCA5/UBE2C/CCNB1/MTBP/ATAD5/RRM2/FAM83D/TFDP1/CDC25A/CDK1	17
BP	GO:0051299	centrosome separation	6/813	15/18800	2.2972e-05	0.000862728	0.000783716	NDE1/NEK2/AURKA/RANBP1/KIF11/CHEK1	6
BP	GO:2000104	negative regulation of DNA-templated DNA replication	6/813	15/18800	2.2972e-05	0.000862728	0.000783716	ZNF830/BLM/GMNN/TIMELESS/CDT1/BRCA2	6
BP	GO:0009113	purine nucleobase biosynthetic process	5/813	10/18800	3.1397e-05	0.00116914	0.00106206	SHMT2/GMPS/APRT/ADA/PAICS	5
BP	GO:0090307	mitotic spindle assembly	12/813	69/18800	3.58825e-05	0.00132494	0.0012036	CHMP4B/PLK1/TPX2/PRC1/KIFC1/MYBL2/NEK2/AURKB/CDC20/KIF23/RACGAP1/KIF11	12
BP	GO:0051383	kinetochore organization	7/813	23/18800	3.67814e-05	0.00134681	0.00122347	CENPX/CDT1/KNTC1/CENPF/CENPW/SMC4/NUF2	7
BP	GO:0051443	positive regulation of ubiquitin-protein transferase activity	8/813	32/18800	4.92775e-05	0.00178947	0.00162558	AXIN1/STUB1/RPS2/PLK1/CDC20/UBE2C/UBE2S/DCUN1D5	8
BP	GO:0000018	regulation of DNA recombination	17/813	131/18800	5.03388e-05	0.00181302	0.00164698	ACTB/PPP4C/ACTL6A/BLM/RAD51/ALYREF/MAGEF1/RMI2/TIMELESS/POLQ/H1-0/KPNA2/YEATS4/PARPBP/PARP3/ATAD5/CHEK1	17
BP	GO:0031297	replication fork processing	9/813	41/18800	5.09316e-05	0.00181946	0.00165282	EME1/BLM/EME2/RAD51/CENPX/ALYREF/RFWD3/TRAIP/BRCA2	9
BP	GO:0000076	DNA replication checkpoint signaling	6/813	17/18800	5.27289e-05	0.00186847	0.00169735	ZNF830/TICRR/CDC6/TIMELESS/CDC45/CDT1	6
BP	GO:0007080	mitotic metaphase plate congression	10/813	51/18800	5.51643e-05	0.00193665	0.00175928	CHMP4B/KIF22/EML4/KIFC1/AURKB/CDT1/KIF18A/CDCA5/CCNB1/NUF2	10
BP	GO:0042273	ribosomal large subunit biogenesis	12/813	72/18800	5.55343e-05	0.00193665	0.00175928	TRAF7/RSL1D1/FASTKD2/HEATR3/EIF6/RRP15/NIFK/ZNF622/WDR12/DDX18/GTPBP4/RPL3L	12
BP	GO:0022618	ribonucleoprotein complex assembly	22/813	200/18800	5.71908e-05	0.00197871	0.00179749	TRAF7/SNRPD3/LUC7L/MRPS11/FASTKD2/SNRPG/EIF2S2/RAMAC/ERAL1/EIF6/USP39/MRPS7/LSM2/SNRPC/COIL/EIF3CL/RRP7A/HSP90AA1/RPL3L/SRPK3/SNRPE/SMN1	22
BP	GO:0000377	RNA splicing, via transesterification reactions with bulged adenosine as nucleophile	30/813	321/18800	6.5298e-05	0.00222418	0.00202048	RNPS1/SRRM2/SNRNP25/ZCRB1/SNRPD3/RALY/RSRC1/LUC7L/NCL/SNRPG/SF3B4/FXR1/USP39/LSM6/LSM2/SNRPC/SNRPA1/COIL/PHF5A/HNRNPF/HTATSF1/SF3B5/ZMAT2/PPIL1/LSM3/ALYREF/SRPK3/PABPC1/SNRPE/SMN1	30
BP	GO:0000398	mRNA splicing, via spliceosome	30/813	321/18800	6.5298e-05	0.00222418	0.00202048	RNPS1/SRRM2/SNRNP25/ZCRB1/SNRPD3/RALY/RSRC1/LUC7L/NCL/SNRPG/SF3B4/FXR1/USP39/LSM6/LSM2/SNRPC/SNRPA1/COIL/PHF5A/HNRNPF/HTATSF1/SF3B5/ZMAT2/PPIL1/LSM3/ALYREF/SRPK3/PABPC1/SNRPE/SMN1	30
BP	GO:0042770	signal transduction in response to DNA damage	20/813	174/18800	6.63106e-05	0.0022413	0.00203603	EME1/PLK1/ZNF830/TFAP4/TICRR/BLM/EME2/E2F1/DTL/SMYD2/MDC1/RFWD3/SOX4/ATAD5/MIF/CHEK1/BRCA2/BRIP1/SNAI1/CDK1	20
BP	GO:0051307	meiotic chromosome separation	7/813	25/18800	6.68612e-05	0.00224266	0.00203726	SLX4/EME1/NCAPH/EME2/CENPX/NCAPH2/TTK	7
BP	GO:0006397	mRNA processing	41/813	500/18800	6.92853e-05	0.00230636	0.00209514	RNPS1/THOC6/SRRM2/SNRNP25/ZCRB1/SNRPD3/RBBP6/RALY/RSRC1/LUC7L/NCL/NELFE/ZNF830/CSTF1/SNRPG/SUPT4H1/SF3B4/RAMAC/FXR1/USP39/LSM6/LSM2/SNRPC/SNRPA1/COIL/RNF40/PHF5A/HNRNPF/HTATSF1/SF3B5/ZMAT2/PPIL1/LSM3/ALYREF/PNPT1/THOC3/SRPK3/PABPC1/SNRPE/RBM38/SMN1	41
BP	GO:0065004	protein-DNA complex assembly	22/813	203/18800	7.15459e-05	0.0023637	0.00214723	NAA60/OIP5/SMARCB1/HMGB1/RAD51/CENPX/HJURP/H4C9/GMNN/H2BC12/CDC45/HMGB2/CDT1/H1-0/CENPO/H4C14/ASF1B/H3C6/KNTC1/CENPF/CENPW/H2BC7	22
BP	GO:0090224	regulation of spindle organization	9/813	43/18800	7.58672e-05	0.00246217	0.00223667	CHMP4B/RAE1/PLK1/DCTN1/PKD1/TPX2/SPAG5/TACC3/PARP3	9
BP	GO:0032200	telomere organization	19/813	162/18800	7.61841e-05	0.00246217	0.00223667	TELO2/USP7/PARN/SLX4/BLM/RAD51/DKC1/EXO1/FEN1/NEK2/AURKB/H4C9/CCT5/HSP90AA1/NAT10/H4C14/PARP3/H3C6/BRCA2	19
BP	GO:0046112	nucleobase biosynthetic process	6/813	18/18800	7.62072e-05	0.00246217	0.00223667	UMPS/SHMT2/GMPS/APRT/ADA/PAICS	6
BP	GO:0051656	establishment of organelle localization	35/813	404/18800	7.91193e-05	0.00253759	0.00230519	PDPK1/RHOT2/CHMP4B/PLK1/BICDL2/KIF22/EIF6/DCTN1/PDCD10/LTV1/LSG1/NDE1/OPA1/EZR/CLN3/SPHK2/EML4/KIFC1/VAMP8/AURKB/SPAG5/CDT1/KIF18A/CDCA5/CCNB1/MAD2L1/AP1M2/INCENP/CENPF/SAPCD2/FES/FAM83D/NUF2/ADORA2B/PRKCZ	35
BP	GO:0061982	meiosis I cell cycle process	17/813	136/18800	8.11088e-05	0.00258255	0.00234603	SLX4/EME1/PLK1/MND1/EME2/RAD51/CENPX/AURKA/SGO1/CCNB2/TRIP13/SGO2/TEX19/P3H4/BRCA2/CDC25A/BRIP1	17
BP	GO:0000375	RNA splicing, via transesterification reactions	30/813	325/18800	8.18035e-05	0.00258593	0.0023491	RNPS1/SRRM2/SNRNP25/ZCRB1/SNRPD3/RALY/RSRC1/LUC7L/NCL/SNRPG/SF3B4/FXR1/USP39/LSM6/LSM2/SNRPC/SNRPA1/COIL/PHF5A/HNRNPF/HTATSF1/SF3B5/ZMAT2/PPIL1/LSM3/ALYREF/SRPK3/PABPC1/SNRPE/SMN1	30
BP	GO:0051255	spindle midzone assembly	5/813	12/18800	9.17714e-05	0.00288031	0.00261652	PRC1/AURKB/KIF23/RACGAP1/INCENP	5
BP	GO:0018205	peptidyl-lysine modification	34/813	392/18800	9.7389e-05	0.00303495	0.00275699	UBE2I/NAA60/EEF2KMT/ACTB/SETD1A/BRD7/SGF29/NDUFAB1/CREBBP/PWP1/SMYD5/METTL22/NELFE/SUMO1/GLYR1/SRCAP/RANGAP1/ACTL6A/SMARCB1/SPHK2/DPY30/RANBP2/SMYD2/DNMT3B/JARID2/ANTKMT/PAGR1/SOX4/YEATS4/HDAC2/DOHH/CHEK1/P3H4/BRCA2	34
BP	GO:1901992	positive regulation of mitotic cell cycle phase transition	14/813	100/18800	9.98609e-05	0.00309006	0.00280706	CDC6/DBF4B/DTL/ANAPC11/CDK4/CDT1/CDCA5/UBE2C/CCNB1/MTBP/RRM2/TFDP1/CDC25A/CDK1	14
BP	GO:0071826	ribonucleoprotein complex subunit organization	22/813	208/18800	0.000102703	0.00314217	0.00285439	TRAF7/SNRPD3/LUC7L/MRPS11/FASTKD2/SNRPG/EIF2S2/RAMAC/ERAL1/EIF6/USP39/MRPS7/LSM2/SNRPC/COIL/EIF3CL/RRP7A/HSP90AA1/RPL3L/SRPK3/SNRPE/SMN1	22
BP	GO:0070507	regulation of microtubule cytoskeleton organization	18/813	152/18800	0.000102975	0.00314217	0.00285439	MAPRE1/CIB1/CHMP4B/RAE1/PLK1/DCTN1/PKD1/SKA3/CDK2AP2/TPX2/SPAG5/KIF18A/GAS2L1/TACC3/PARP3/WNT3A/FES/RASSF7	18
BP	GO:0001824	blastocyst development	15/813	113/18800	0.000105915	0.00320959	0.00291564	ZNF830/PALB2/ACTL6A/SMARCB1/RRP7A/NEK2/CAPN2/ADA/ASF1B/TTLL4/GINS1/RRM2/CHEK1/GINS4/BRCA2	15
BP	GO:0007076	mitotic chromosome condensation	6/813	19/18800	0.000107319	0.00322986	0.00293406	PLK1/NCAPH/NCAPH2/CDCA5/NCAPG/SMC4	6
BP	GO:0016572	histone phosphorylation	9/813	45/18800	0.000110337	0.00329604	0.00299417	PPP4C/VRK2/AURKB/AURKA/HASPIN/CCNA2/INCENP/CHEK1/CDK1	9
BP	GO:0006091	generation of precursor metabolites and energy	40/813	494/18800	0.000111018	0.00329604	0.00299417	NDUFB10/TRAP1/JMJD8/IDH2/NDUFAB1/MTFR2/TACO1/EIF6/ALDOA/RPIA/NDUFB3/RPE/CYB561/SPHK2/TALDO1/NDUFS1/DDIT4/SHMT2/ETFA/COX5A/PKM/FOXK1/PNPT1/GBA/ANTKMT/CHCHD10/PHKB/PPIF/PFKFB2/DEGS1/CCNB1/NDUFS6/XYLB/ABCD1/NDUFB9/NHLRC1/NUPR1/MTLN/CDK1/HAAO	40
BP	GO:0006753	nucleoside phosphate metabolic process	40/813	495/18800	0.000115908	0.00341811	0.00310506	NTHL1/ATP6V0C/JMJD8/ATIC/DCTPP1/TK1/EIF6/ALDOA/COASY/CNP/OPA1/UMPS/SPHK2/IMPDH1/ACSL3/NME1/DDIT4/PDE8A/PKM/GMPS/FOXK1/ANTKMT/NME3/PDE4A/PRPSAP1/APRT/ADA/PFKFB2/NME4/ABCD1/UNG/PAPSS2/RRM2/PAICS/SULT1A1/NUPR1/PDZD3/ADCY9/ADORA2B/HAAO	40
BP	GO:0051438	regulation of ubiquitin-protein transferase activity	10/813	56/18800	0.00012646	0.00370445	0.00336518	AXIN1/STUB1/RPS2/PLK1/BUB1B/CDC20/UBE2C/MAD2L1/UBE2S/DCUN1D5	10
BP	GO:0001833	inner cell mass cell proliferation	5/813	13/18800	0.000143825	0.00418521	0.00380191	PALB2/GINS1/CHEK1/GINS4/BRCA2	5
BP	GO:0000470	maturation of LSU-rRNA	7/813	28/18800	0.000147035	0.00421504	0.00382901	RSL1D1/EIF6/RRP15/NIFK/WDR12/DDX18/GTPBP4	7
BP	GO:0062125	regulation of mitochondrial gene expression	7/813	28/18800	0.000147035	0.00421504	0.00382901	FASTKD2/CDK5RAP1/COA3/TACO1/NGRN/SHMT2/CHCHD10	7
BP	GO:0009168	purine ribonucleoside monophosphate biosynthetic process	6/813	20/18800	0.000147728	0.00421504	0.00382901	ATIC/IMPDH1/GMPS/APRT/ADA/PAICS	6
BP	GO:0007127	meiosis I	16/813	130/18800	0.000156434	0.00443465	0.00402851	SLX4/EME1/PLK1/MND1/EME2/RAD51/CENPX/AURKA/SGO1/CCNB2/TRIP13/SGO2/TEX19/P3H4/BRCA2/BRIP1	16
BP	GO:0051302	regulation of cell division	20/813	186/18800	0.000167029	0.00470464	0.00427377	CIB1/SGF29/PLK1/SMYD5/ORC6/PLK4/CDC6/BLM/CALM2/CDK2AP2/PRC1/AURKB/AURKA/KIF18B/KIF23/RACGAP1/RBL1/E2F8/BRCA2/ECT2	20
BP	GO:0009117	nucleotide metabolic process	39/813	487/18800	0.000169359	0.00473988	0.00430578	NTHL1/ATP6V0C/JMJD8/ATIC/DCTPP1/EIF6/ALDOA/COASY/CNP/OPA1/UMPS/SPHK2/IMPDH1/ACSL3/NME1/DDIT4/PDE8A/PKM/GMPS/FOXK1/ANTKMT/NME3/PDE4A/PRPSAP1/APRT/ADA/PFKFB2/NME4/ABCD1/UNG/PAPSS2/RRM2/PAICS/SULT1A1/NUPR1/PDZD3/ADCY9/ADORA2B/HAAO	39
BP	GO:2001020	regulation of response to DNA damage stimulus	24/813	246/18800	0.000178888	0.00497489	0.00451927	ACTB/PPP4C/FXR1/NUDT16L1/ACTL6A/HMGB1/RAD51/WRNIP1/MAGEF1/RMI2/SMYD2/TIMELESS/RNF168/POLQ/RFWD3/SOX4/YEATS4/PARPBP/PARP3/ATAD5/MIF/CHEK1/DDIAS/SNAI1	24
BP	GO:0072522	purine-containing compound biosynthetic process	21/813	202/18800	0.000186352	0.0051397	0.00466898	ATP6V0C/ATIC/ALDOA/COASY/SPHK2/IMPDH1/ACSL3/NME1/SHMT2/GMPS/ANTKMT/NME3/PRPSAP1/APRT/ADA/NME4/PAPSS2/PAICS/PDZD3/ADCY9/ADORA2B	21
BP	GO:0000723	telomere maintenance	16/813	132/18800	0.000187153	0.0051397	0.00466898	TELO2/USP7/PARN/SLX4/BLM/RAD51/DKC1/EXO1/FEN1/NEK2/AURKB/CCT5/HSP90AA1/NAT10/PARP3/BRCA2	16
BP	GO:0010569	regulation of double-strand break repair via homologous recombination	11/813	70/18800	0.000193936	0.00529288	0.00480814	ACTB/PPP4C/ACTL6A/RAD51/MAGEF1/RMI2/TIMELESS/POLQ/YEATS4/PARPBP/CHEK1	11
BP	GO:0001832	blastocyst growth	6/813	21/18800	0.000199291	0.00540546	0.0049104	ZNF830/PALB2/GINS1/CHEK1/GINS4/BRCA2	6
BP	GO:0034470	ncRNA processing	35/813	424/18800	0.000203194	0.00547752	0.00497586	TBL3/TSR3/RPUSD1/PARN/POLR3K/NOP58/DDX27/RSL1D1/PWP1/RPUSD2/MRPS11/CDK5RAP1/MOCS3/EIF6/LSM6/METTL2A/WDR18/RRP15/NIFK/KRI1/NSUN2/RPP21/DKC1/RRP7A/WDR12/DDX18/LYAR/SLX9/GTPBP4/NAT10/RPP40/RPP25/HENMT1/RIOK1/POP1	35
BP	GO:0060236	regulation of mitotic spindle organization	8/813	39/18800	0.000220457	0.00590663	0.00536568	CHMP4B/RAE1/PLK1/DCTN1/PKD1/TPX2/TACC3/PARP3	8
BP	GO:0010458	exit from mitosis	7/813	30/18800	0.000234432	0.006243	0.00567124	CHMP4B/PPP1R9B/CDCA5/UBE2C/KNTC1/ANLN/UBE2S	7
BP	GO:0010498	proteasomal protein catabolic process	39/813	496/18800	0.000245959	0.00651051	0.00591425	KCTD5/ZNF598/CCNF/AXIN1/USP7/ELOB/STUB1/PSMD1/SPSB3/RHBDF1/PLK1/ANKZF1/SUMO1/PKD1/PSME4/PSMA4/FBXL19/RNF40/ZFAND2B/PSMA7/HFE/KEAP1/AURKA/DTL/SDF2L1/CDC20/HSPBP1/PSMD2/FBXO45/GBA/TRAF4/FOXRED2/FBXL18/UBE2C/RNF144B/NHLRC1/NUPR1/ANAPC1/UBE2S	39
BP	GO:0070192	chromosome organization involved in meiotic cell cycle	11/813	72/18800	0.000250441	0.00658945	0.00598596	NCAPH/RAD51/BUB1B/SGO1/TRIP13/NCAPH2/BUB1/SGO2/SMC4/P3H4/BRIP1	11
BP	GO:0006164	purine nucleotide biosynthetic process	20/813	192/18800	0.000255888	0.0066927	0.00607975	ATP6V0C/ATIC/ALDOA/COASY/SPHK2/IMPDH1/ACSL3/NME1/GMPS/ANTKMT/NME3/PRPSAP1/APRT/ADA/NME4/PAPSS2/PAICS/PDZD3/ADCY9/ADORA2B	20
BP	GO:0009127	purine nucleoside monophosphate biosynthetic process	6/813	22/18800	0.000264059	0.00686554	0.00623676	ATIC/IMPDH1/GMPS/APRT/ADA/PAICS	6
BP	GO:0044774	mitotic DNA integrity checkpoint signaling	12/813	85/18800	0.000284611	0.00735636	0.00668264	EME1/PLK1/ZNF830/TICRR/CDC6/BLM/EME2/DTL/MDC1/RFWD3/CHEK1/CDK1	12
BP	GO:0034508	centromere complex assembly	7/813	31/18800	0.000291607	0.00744954	0.00676728	OIP5/CENPX/HJURP/CENPO/KNTC1/CENPF/CENPW	7
BP	GO:1902751	positive regulation of cell cycle G2/M phase transition	7/813	31/18800	0.000291607	0.00744954	0.00676728	DBF4B/DTL/CDK4/CCNB1/ATAD5/CDC25A/CDK1	7
BP	GO:0072521	purine-containing compound metabolic process	34/813	416/18800	0.000299313	0.00758637	0.00689158	ATP6V0C/JMJD8/ATIC/EIF6/ALDOA/COASY/OPA1/SPHK2/IMPDH1/ACSL3/NME1/DDIT4/PDE8A/SHMT2/PKM/GMPS/FOXK1/NUDT1/ANTKMT/NME3/PDE4A/PRPSAP1/APRT/ADA/PFKFB2/NME4/ABCD1/PAPSS2/PAICS/SULT1A1/NUPR1/PDZD3/ADCY9/ADORA2B	34
BP	GO:0030490	maturation of SSU-rRNA	9/813	51/18800	0.000300416	0.00758637	0.00689158	TBL3/TSR3/MRPS11/LSM6/KRI1/SLX9/NAT10/RPP40/RIOK1	9
BP	GO:0006271	DNA strand elongation involved in DNA replication	5/813	15/18800	0.000312183	0.00783848	0.0071206	LIG1/RFC3/RFC4/MCM3/GINS1	5
BP	GO:1901293	nucleoside phosphate biosynthetic process	24/813	257/18800	0.000343899	0.00854657	0.00776384	ATP6V0C/ATIC/TK1/ALDOA/COASY/UMPS/SPHK2/IMPDH1/ACSL3/NME1/GMPS/ANTKMT/NME3/PRPSAP1/APRT/ADA/NME4/PAPSS2/RRM2/PAICS/PDZD3/ADCY9/ADORA2B/HAAO	24
BP	GO:0000966	RNA 5'-end processing	6/813	23/18800	0.000344275	0.00854657	0.00776384	TBL3/RPP21/PNPT1/RPP40/RPP25/POP1	6
BP	GO:0046034	ATP metabolic process	25/813	273/18800	0.000351522	0.00867745	0.00788274	NDUFB10/ATP6V0C/JMJD8/NDUFAB1/EIF6/ALDOA/NDUFB3/SPHK2/NDUFS1/DDIT4/SHMT2/COX5A/PKM/FOXK1/ANTKMT/CHCHD10/PPIF/PFKFB2/TSPO/CCNB1/NDUFS6/ABCD1/NDUFB9/NUPR1/CDK1	25
BP	GO:0036297	interstrand cross-link repair	7/813	32/18800	0.000359459	0.00882382	0.0080157	HROB/SLX4/RAD51/CENPX/RNF168/RFWD3/NEIL3	7
BP	GO:0008380	RNA splicing	35/813	438/18800	0.000373878	0.00912678	0.00829091	RNPS1/THOC6/SRRM2/SNRNP25/ZCRB1/SNRPD3/RALY/RSRC1/LUC7L/NCL/ZNF830/SNRPG/SF3B4/FXR1/USP39/LSM6/LSM2/SNRPC/SNRPA1/COIL/PPP1R9B/PHF5A/HNRNPF/HTATSF1/SF3B5/ZMAT2/PPIL1/LSM3/ALYREF/THOC3/SRPK3/PABPC1/SNRPE/RBM38/SMN1	35
BP	GO:0072331	signal transduction by p53 class mediator	18/813	170/18800	0.000419469	0.0101831	0.00925052	USP7/AEN/C16orf72/BAX/TFAP4/DDIT4/E2F1/AURKB/AURKA/SMYD2/SOX4/CDIP1/ATAD5/MIF/NUPR1/CHEK1/BRCA2/SNAI1	18
BP	GO:0045931	positive regulation of mitotic cell cycle	15/813	128/18800	0.000424826	0.0102565	0.00931718	CDC6/DBF4B/DTL/ANAPC11/CDK4/CDT1/CDCA5/UBE2C/CCNB1/MTBP/RRM2/TFDP1/BRCA2/CDC25A/CDK1	15
BP	GO:0006336	DNA replication-independent chromatin assembly	7/813	33/18800	0.000439383	0.0104927	0.0095317	UBN1/OIP5/HJURP/H4C9/H4C14/ASF1B/CENPW	7
BP	GO:0007143	female meiotic nuclear division	7/813	33/18800	0.000439383	0.0104927	0.0095317	PLK1/NCAPH/AURKA/CCNB2/TRIP13/NCAPH2/TTK	7
BP	GO:0070129	regulation of mitochondrial translation	6/813	24/18800	0.000442367	0.0105068	0.00954457	FASTKD2/CDK5RAP1/COA3/TACO1/NGRN/SHMT2	6
BP	GO:0006284	base-excision repair	8/813	43/18800	0.000446022	0.0105367	0.00957167	NTHL1/MPG/POLG/LIG1/FEN1/POLQ/UNG/NEIL3	8
BP	GO:0045333	cellular respiration	22/813	231/18800	0.00045681	0.0107338	0.00975077	NDUFB10/TRAP1/IDH2/NDUFAB1/MTFR2/NDUFB3/NDUFS1/SHMT2/ETFA/COX5A/PNPT1/GBA/ANTKMT/CHCHD10/PPIF/CCNB1/NDUFS6/ABCD1/NDUFB9/NUPR1/MTLN/CDK1	22
BP	GO:1903364	positive regulation of cellular protein catabolic process	17/813	157/18800	0.000463002	0.0108214	0.00983037	AXIN1/ELOB/STUB1/VPS35/PLK1/SUMO1/RNF40/EZR/KEAP1/AURKA/MAGEF1/CDC20/HSPBP1/HSP90AA1/GBA/RNF144B/NUPR1	17
BP	GO:0006163	purine nucleotide metabolic process	32/813	394/18800	0.000496457	0.0114812	0.0104297	ATP6V0C/JMJD8/ATIC/EIF6/ALDOA/COASY/OPA1/SPHK2/IMPDH1/ACSL3/NME1/DDIT4/PDE8A/PKM/GMPS/FOXK1/ANTKMT/NME3/PDE4A/PRPSAP1/APRT/ADA/PFKFB2/NME4/ABCD1/PAPSS2/PAICS/SULT1A1/NUPR1/PDZD3/ADCY9/ADORA2B	32
BP	GO:0019693	ribose phosphate metabolic process	32/813	394/18800	0.000496457	0.0114812	0.0104297	ATP6V0C/JMJD8/ATIC/EIF6/ALDOA/RPIA/COASY/OPA1/UMPS/SPHK2/IMPDH1/ACSL3/NME1/DDIT4/PDE8A/PKM/GMPS/FOXK1/ANTKMT/NME3/PDE4A/PRPSAP1/APRT/ADA/PFKFB2/NME4/ABCD1/PAPSS2/PAICS/SULT1A1/NUPR1/ADCY9	32
BP	GO:0009124	nucleoside monophosphate biosynthetic process	8/813	44/18800	0.000524748	0.0120693	0.0109639	ATIC/TK1/UMPS/IMPDH1/GMPS/APRT/ADA/PAICS	8
BP	GO:0007006	mitochondrial membrane organization	14/813	117/18800	0.000528391	0.0120693	0.0109639	RHOT2/ZNF205/MTX1/TOMM22/MAIP1/IMMT/BAX/CNP/OPA1/TMEM14A/HSP90AA1/CHCHD10/PPIF/MPV17L	14
BP	GO:0009156	ribonucleoside monophosphate biosynthetic process	7/813	34/18800	0.000532873	0.0120693	0.0109639	ATIC/UMPS/IMPDH1/GMPS/APRT/ADA/PAICS	7
BP	GO:0034724	DNA replication-independent chromatin organization	7/813	34/18800	0.000532873	0.0120693	0.0109639	UBN1/OIP5/HJURP/H4C9/H4C14/ASF1B/CENPW	7
BP	GO:0034728	nucleosome organization	17/813	159/18800	0.000536169	0.0120813	0.0109748	NAA60/SMARCD2/OIP5/PSME4/SRCAP/SMARCB1/HMGA1/HJURP/H4C9/H2BC12/HMGB2/H1-0/H4C14/ASF1B/H3C6/CENPW/H2BC7	17
BP	GO:0032465	regulation of cytokinesis	12/813	91/18800	0.0005389	0.0120813	0.0109748	PLK1/PLK4/CDC6/CALM2/PRC1/AURKB/AURKA/KIF23/RACGAP1/E2F8/BRCA2/ECT2	12
BP	GO:0044270	cellular nitrogen compound catabolic process	35/813	449/18800	0.000587562	0.0128653	0.0116871	RNPS1/NTHL1/PARN/HMOX2/GSPT1/FASTKD2/EDC3/CNOT11/DCTPP1/FXR1/LSM6/BAX/LSM2/DNASE1/CNP/NSUN2/CARHSP1/DKC1/FEN1/SMG8/PDE8A/E2F1/PNPT1/NUDT1/PDE4A/ADA/PABPC1/ABCD1/UNG/RNASEH2A/POP1/TST/DNASE1L2/IKBKE/HAAO	35
BP	GO:0006560	proline metabolic process	4/813	10/18800	0.000591442	0.0128653	0.0116871	PYCR2/PYCR1/OAT/PYCR3	4
BP	GO:0031118	rRNA pseudouridine synthesis	4/813	10/18800	0.000591442	0.0128653	0.0116871	TSR3/RPUSD1/RPUSD2/DKC1	4
BP	GO:0045144	meiotic sister chromatid segregation	4/813	10/18800	0.000591442	0.0128653	0.0116871	BUB1B/SGO1/BUB1/SGO2	4
BP	GO:0051177	meiotic sister chromatid cohesion	4/813	10/18800	0.000591442	0.0128653	0.0116871	BUB1B/SGO1/BUB1/SGO2	4
BP	GO:0051231	spindle elongation	4/813	10/18800	0.000591442	0.0128653	0.0116871	PRC1/AURKB/KIF23/RACGAP1	4
BP	GO:0009084	glutamine family amino acid biosynthetic process	5/813	17/18800	0.000598514	0.012955	0.0117685	PYCR2/CLN3/PYCR1/OAT/PYCR3	5
BP	GO:0046390	ribose phosphate biosynthetic process	19/813	191/18800	0.000641712	0.013822	0.0125561	ATP6V0C/ATIC/ALDOA/COASY/UMPS/SPHK2/IMPDH1/ACSL3/NME1/GMPS/ANTKMT/NME3/PRPSAP1/APRT/ADA/NME4/PAPSS2/PAICS/ADCY9	19
BP	GO:0006520	cellular amino acid metabolic process	25/813	285/18800	0.000664271	0.0142381	0.0129341	GATB/EARS2/IARS2/PYCR2/GOT2/SEPHS2/BCKDK/CLN3/SHMT2/ETFA/EPRS1/BLMH/ACY1/GMPS/PYCR1/OAT/HYKK/GGT1/HPDL/PYCR3/IVD/DIO1/TST/MCCC1/HAAO	25
BP	GO:0046037	GMP metabolic process	6/813	26/18800	0.000702803	0.0148515	0.0134913	ATIC/IMPDH1/GMPS/APRT/ADA/PAICS	6
BP	GO:0007131	reciprocal meiotic recombination	9/813	57/18800	0.000705016	0.0148515	0.0134913	SLX4/EME1/MND1/EME2/RAD51/CENPX/TRIP13/TEX19/BRIP1	9
BP	GO:0140527	reciprocal homologous recombination	9/813	57/18800	0.000705016	0.0148515	0.0134913	SLX4/EME1/MND1/EME2/RAD51/CENPX/TRIP13/TEX19/BRIP1	9
BP	GO:0044773	mitotic DNA damage checkpoint signaling	11/813	81/18800	0.000706408	0.0148515	0.0134913	EME1/PLK1/ZNF830/TICRR/BLM/EME2/DTL/MDC1/RFWD3/CHEK1/CDK1	11
BP	GO:0009165	nucleotide biosynthetic process	23/813	255/18800	0.00073441	0.0153667	0.0139593	ATP6V0C/ATIC/ALDOA/COASY/UMPS/SPHK2/IMPDH1/ACSL3/NME1/GMPS/ANTKMT/NME3/PRPSAP1/APRT/ADA/NME4/PAPSS2/RRM2/PAICS/PDZD3/ADCY9/ADORA2B/HAAO	23
BP	GO:0051101	regulation of DNA binding	14/813	121/18800	0.000742179	0.0154556	0.0140401	SUMO1/TFAP4/CALM2/HMGB1/CPNE1/NME1/E2F1/NEK2/HJURP/WFIKKN1/HMGB2/CDT1/H1-0/HDAC2	14
BP	GO:0034655	nucleobase-containing compound catabolic process	32/813	405/18800	0.000792015	0.0164139	0.0149106	RNPS1/NTHL1/PARN/GSPT1/FASTKD2/EDC3/CNOT11/DCTPP1/FXR1/LSM6/BAX/LSM2/DNASE1/CNP/NSUN2/CARHSP1/DKC1/FEN1/SMG8/PDE8A/E2F1/PNPT1/NUDT1/PDE4A/ADA/PABPC1/ABCD1/UNG/RNASEH2A/POP1/DNASE1L2/IKBKE	32
BP	GO:0007096	regulation of exit from mitosis	5/813	18/18800	0.000799401	0.0164139	0.0149106	PPP1R9B/CDCA5/UBE2C/KNTC1/ANLN	5
BP	GO:0031145	anaphase-promoting complex-dependent catabolic process	5/813	18/18800	0.000799401	0.0164139	0.0149106	PLK1/CDC20/UBE2C/ANAPC1/UBE2S	5
BP	GO:0071900	regulation of protein serine/threonine kinase activity	30/813	372/18800	0.000822828	0.0168163	0.0152762	PKMYT1/CCNF/TELO2/AXIN1/MLST8/ACTB/CIB1/PLK1/CDK5RAP1/CKS1B/PKD1/PDCD10/CNPPD1/TFAP4/CDC6/BLM/CALM2/DBF4B/CCNYL1/IQGAP1/GTPBP4/CCNB2/GBA/STK38/CCNA2/CCNB1/INCENP/MIF/IPO5/CDC25A	30
BP	GO:0016570	histone modification	37/813	494/18800	0.000870704	0.0177124	0.0160902	NAA60/USP7/ACTB/SETD1A/BRD7/SGF29/PPP4C/CREBBP/PWP1/SMYD5/PHB1/NELFE/GLYR1/SRCAP/ACTL6A/FBXL19/RNF40/SMARCB1/SPHK2/DPY30/SF3B5/VRK2/AURKB/AURKA/SMYD2/RNF168/DNMT3B/JARID2/HASPIN/CCNA2/PAGR1/YEATS4/HDAC2/INCENP/CHEK1/BRCA2/CDK1	37
BP	GO:0006183	GTP biosynthetic process	4/813	11/18800	0.000897689	0.0178482	0.0162136	IMPDH1/NME1/NME3/NME4	4
BP	GO:0007135	meiosis II	4/813	11/18800	0.000897689	0.0178482	0.0162136	BUB1B/SGO1/BUB1/SGO2	4
BP	GO:0061983	meiosis II cell cycle process	4/813	11/18800	0.000897689	0.0178482	0.0162136	BUB1B/SGO1/BUB1/SGO2	4
BP	GO:0072697	protein localization to cell cortex	4/813	11/18800	0.000897689	0.0178482	0.0162136	PLK1/PPP1R9B/EZR/SAPCD2	4
BP	GO:1904668	positive regulation of ubiquitin protein ligase activity	4/813	11/18800	0.000897689	0.0178482	0.0162136	PLK1/CDC20/UBE2C/UBE2S	4
BP	GO:0035825	homologous recombination	9/813	59/18800	0.000911837	0.0179615	0.0163165	SLX4/EME1/MND1/EME2/RAD51/CENPX/TRIP13/TEX19/BRIP1	9
BP	GO:0006282	regulation of DNA repair	16/813	152/18800	0.000914492	0.0179615	0.0163165	ACTB/PPP4C/NUDT16L1/ACTL6A/HMGB1/RAD51/WRNIP1/MAGEF1/RMI2/TIMELESS/RNF168/POLQ/YEATS4/PARPBP/PARP3/CHEK1	16
BP	GO:0046700	heterocycle catabolic process	34/813	443/18800	0.000915652	0.0179615	0.0163165	RNPS1/NTHL1/PARN/HMOX2/GSPT1/FASTKD2/EDC3/CNOT11/DCTPP1/FXR1/LSM6/BAX/LSM2/DNASE1/CNP/NSUN2/CARHSP1/DKC1/FEN1/SMG8/PDE8A/E2F1/PNPT1/NUDT1/PDE4A/ADA/PABPC1/ABCD1/UNG/RNASEH2A/POP1/DNASE1L2/IKBKE/HAAO	34
BP	GO:0006913	nucleocytoplasmic transport	26/813	308/18800	0.000925182	0.0179684	0.0163228	THOC6/AXIN1/TSC2/RAE1/RSRC1/NUP93/SUMO1/XPO6/HEATR3/EIF6/JUP/PKD1/LTV1/LSG1/NUP107/RANGAP1/CSE1L/NSUN2/HTATIP2/ALYREF/RANBP2/KPNA2/THOC3/IPO5/ECT2/CDK1	26
BP	GO:0051169	nuclear transport	26/813	308/18800	0.000925182	0.0179684	0.0163228	THOC6/AXIN1/TSC2/RAE1/RSRC1/NUP93/SUMO1/XPO6/HEATR3/EIF6/JUP/PKD1/LTV1/LSG1/NUP107/RANGAP1/CSE1L/NSUN2/HTATIP2/ALYREF/RANBP2/KPNA2/THOC3/IPO5/ECT2/CDK1	26
BP	GO:2000779	regulation of double-strand break repair	13/813	110/18800	0.000928271	0.0179684	0.0163228	ACTB/PPP4C/NUDT16L1/ACTL6A/RAD51/MAGEF1/RMI2/TIMELESS/POLQ/YEATS4/PARPBP/PARP3/CHEK1	13
BP	GO:0006839	mitochondrial transport	18/813	182/18800	0.000942246	0.0181589	0.0164958	RHOT2/ZNF205/VPS35/TOMM22/DNAJC19/MAIP1/BAX/CNP/TIMM17A/TMEM14A/HSPD1/HSP90AA1/SLC25A10/CHCHD10/FLVCR1/PPIF/TSPO/MPV17L	18
BP	GO:1904375	regulation of protein localization to cell periphery	14/813	124/18800	0.0009469	0.0181689	0.0165049	PDPK1/ACTB/CIB1/PLK1/PPP1R9B/EZR/CLN3/ACSL3/VAMP8/PPP2R5A/WNT3A/NHLRC1/SAPCD2/PRKCZ	14
BP	GO:0044818	mitotic G2/M transition checkpoint	8/813	48/18800	0.000959463	0.0183299	0.0166512	PLK1/ZNF830/TICRR/CDC6/BLM/DTL/CHEK1/CDK1	8
BP	GO:0031396	regulation of protein ubiquitination	20/813	213/18800	0.000969983	0.0184507	0.0167609	AXIN1/STUB1/RPS2/PLK1/RNF40/FANCI/CENPX/BUB1B/CDC20/HSPBP1/GTPBP4/HSP90AA1/SOX4/TSPO/UBE2C/MTBP/MAD2L1/NHLRC1/UBE2S/DCUN1D5	20
BP	GO:0006119	oxidative phosphorylation	15/813	139/18800	0.00101269	0.01918	0.0174234	NDUFB10/NDUFAB1/NDUFB3/NDUFS1/SHMT2/COX5A/ANTKMT/CHCHD10/PPIF/CCNB1/NDUFS6/ABCD1/NDUFB9/NUPR1/CDK1	15
BP	GO:0006144	purine nucleobase metabolic process	5/813	19/18800	0.00104657	0.0197367	0.0179291	SHMT2/GMPS/APRT/ADA/PAICS	5
BP	GO:0010971	positive regulation of G2/M transition of mitotic cell cycle	6/813	28/18800	0.0010683	0.0199888	0.0181581	DBF4B/DTL/CDK4/CCNB1/CDC25A/CDK1	6
BP	GO:0009260	ribonucleotide biosynthetic process	18/813	184/18800	0.00106904	0.0199888	0.0181581	ATP6V0C/ATIC/ALDOA/COASY/UMPS/SPHK2/IMPDH1/ACSL3/NME1/GMPS/ANTKMT/NME3/APRT/ADA/NME4/PAPSS2/PAICS/ADCY9	18
BP	GO:0030261	chromosome condensation	8/813	49/18800	0.00110391	0.0205534	0.018671	PLK1/NCAPH/NCAPH2/H1-0/CDCA5/NCAPG/SMC4/CDK1	8
BP	GO:0009152	purine ribonucleotide biosynthetic process	17/813	170/18800	0.00114198	0.0211724	0.0192333	ATP6V0C/ATIC/ALDOA/COASY/SPHK2/IMPDH1/ACSL3/NME1/GMPS/ANTKMT/NME3/APRT/ADA/NME4/PAPSS2/PAICS/ADCY9	17
BP	GO:0032886	regulation of microtubule-based process	22/813	249/18800	0.00124077	0.0229074	0.0208094	CCNF/MAPRE1/CIB1/CHMP4B/RAE1/PLK1/DCTN1/PKD1/PLK4/SKA3/CDK2AP2/TPX2/AURKA/SPAG5/NAT10/KIF18A/GAS2L1/TACC3/PARP3/WNT3A/FES/RASSF7	22
BP	GO:0000727	double-strand break repair via break-induced replication	4/813	12/18800	0.00130065	0.0235291	0.0213742	CDC45/MCM5/MCM3/GINS4	4
BP	GO:0006285	base-excision repair, AP site formation	4/813	12/18800	0.00130065	0.0235291	0.0213742	NTHL1/MPG/UNG/NEIL3	4
BP	GO:0070601	centromeric sister chromatid cohesion	4/813	12/18800	0.00130065	0.0235291	0.0213742	BUB1B/SGO1/BUB1/SGO2	4
BP	GO:0072711	cellular response to hydroxyurea	4/813	12/18800	0.00130065	0.0235291	0.0213742	RTF2/BLM/RAD51/TIMELESS	4
BP	GO:0009150	purine ribonucleotide metabolic process	29/813	366/18800	0.00130811	0.0235291	0.0213742	ATP6V0C/JMJD8/ATIC/EIF6/ALDOA/COASY/OPA1/SPHK2/IMPDH1/ACSL3/NME1/DDIT4/PDE8A/PKM/GMPS/FOXK1/ANTKMT/NME3/PDE4A/APRT/ADA/PFKFB2/NME4/ABCD1/PAPSS2/PAICS/SULT1A1/NUPR1/ADCY9	29
BP	GO:0010972	negative regulation of G2/M transition of mitotic cell cycle	9/813	62/18800	0.00131193	0.0235291	0.0213742	PLK1/ZNF830/TICRR/CDC6/BLM/AURKB/DTL/CHEK1/CDK1	9
BP	GO:0042255	ribosome assembly	9/813	62/18800	0.00131193	0.0235291	0.0213742	TRAF7/MRPS11/FASTKD2/ERAL1/EIF6/MRPS7/NGRN/RRP7A/RPL3L	9
BP	GO:0009259	ribonucleotide metabolic process	30/813	384/18800	0.00135816	0.0242593	0.0220375	ATP6V0C/JMJD8/ATIC/EIF6/ALDOA/COASY/OPA1/UMPS/SPHK2/IMPDH1/ACSL3/NME1/DDIT4/PDE8A/PKM/GMPS/FOXK1/ANTKMT/NME3/PDE4A/APRT/ADA/PFKFB2/NME4/ABCD1/PAPSS2/PAICS/SULT1A1/NUPR1/ADCY9	30
BP	GO:0008630	intrinsic apoptotic signaling pathway in response to DNA damage	12/813	101/18800	0.00137488	0.0244585	0.0222184	AEN/BAX/DDIT4/E2F1/CDIP1/ATAD5/MIF/NUPR1/IKBKE/BRCA2/DDIAS/SNAI1	12
BP	GO:0000077	DNA damage checkpoint signaling	13/813	115/18800	0.00140444	0.0248835	0.0226046	EME1/PLK1/ZNF830/TICRR/BLM/EME2/E2F1/DTL/MDC1/RFWD3/CHEK1/BRIP1/CDK1	13
BP	GO:0000910	cytokinesis	17/813	174/18800	0.00147383	0.0260081	0.0236262	STAMBP/CHMP4B/PLK1/PLK4/CDC6/CALM2/PRC1/AURKB/AURKA/KIF23/RACGAP1/ANLN/INCENP/E2F8/CEP55/BRCA2/ECT2	17
BP	GO:1901800	positive regulation of proteasomal protein catabolic process	13/813	116/18800	0.00152061	0.0267263	0.0242786	AXIN1/ELOB/STUB1/PLK1/SUMO1/RNF40/KEAP1/AURKA/CDC20/HSPBP1/GBA/RNF144B/NUPR1	13
BP	GO:2001252	positive regulation of chromosome organization	11/813	89/18800	0.00155743	0.0272643	0.0247673	PARN/SLX4/NCAPH/DKC1/FEN1/NEK2/AURKB/CCT5/CDT1/NCAPG/SMC4	11
BP	GO:0070979	protein K11-linked ubiquitination	6/813	30/18800	0.00156426	0.0272752	0.0247773	UBE2T/RNF26/ANAPC11/UBE2C/ANAPC1/UBE2S	6
BP	GO:1902750	negative regulation of cell cycle G2/M phase transition	9/813	64/18800	0.00164956	0.0286489	0.0260251	PLK1/ZNF830/TICRR/CDC6/BLM/AURKB/DTL/CHEK1/CDK1	9
BP	GO:0034471	ncRNA 5'-end processing	5/813	21/18800	0.00170459	0.0294058	0.0267127	TBL3/RPP21/RPP40/RPP25/POP1	5
BP	GO:0070301	cellular response to hydrogen peroxide	11/813	90/18800	0.00170653	0.0294058	0.0267127	TRAP1/ANKZF1/PDCD10/PDE8A/PYCR1/PPIF/HDAC2/TRPM2/RNF112/ECT2/CDK1	11
BP	GO:0001682	tRNA 5'-leader removal	4/813	13/18800	0.00181479	0.031028	0.0281863	RPP21/RPP40/RPP25/POP1	4
BP	GO:0072710	response to hydroxyurea	4/813	13/18800	0.00181479	0.031028	0.0281863	RTF2/BLM/RAD51/TIMELESS	4
BP	GO:1903362	regulation of cellular protein catabolic process	22/813	258/18800	0.00194968	0.033205	0.030164	AXIN1/USP7/ELOB/STUB1/VPS35/RHBDF1/PLK1/PDCL3/SUMO1/PKD1/RNF40/EZR/HFE/KEAP1/AURKA/MAGEF1/CDC20/HSPBP1/HSP90AA1/GBA/RNF144B/NUPR1	22
BP	GO:1903052	positive regulation of proteolysis involved in cellular protein catabolic process	14/813	134/18800	0.0020027	0.0339764	0.0308647	AXIN1/ELOB/STUB1/PLK1/SUMO1/RNF40/KEAP1/AURKA/MAGEF1/CDC20/HSPBP1/GBA/RNF144B/NUPR1	14
BP	GO:0032436	positive regulation of proteasomal ubiquitin-dependent protein catabolic process	11/813	92/18800	0.00203971	0.0344712	0.0313142	AXIN1/ELOB/STUB1/PLK1/SUMO1/KEAP1/AURKA/CDC20/HSPBP1/GBA/RNF144B	11
BP	GO:0042176	regulation of protein catabolic process	30/813	395/18800	0.00209187	0.0352172	0.0319918	AXIN1/USP7/ELOB/STUB1/VPS35/PSMD1/RHBDF1/PLK1/PHB1/PDCL3/SUMO1/PKD1/RNF40/EZR/PACSIN3/HFE/KEAP1/AURKA/DTL/MAGEF1/CDC20/HSPBP1/PSMD2/HSP90AA1/GBA/TMEM9/MAD2L1/RNF144B/NUPR1/FAM83D	30
BP	GO:0043486	histone exchange	5/813	22/18800	0.00212828	0.0356305	0.0323673	OIP5/PSME4/SRCAP/HJURP/CENPW	5
BP	GO:0019439	aromatic compound catabolic process	34/813	466/18800	0.00213264	0.0356305	0.0323673	RNPS1/NTHL1/PARN/HMOX2/GSPT1/FASTKD2/EDC3/CNOT11/DCTPP1/FXR1/LSM6/BAX/LSM2/DNASE1/CNP/NSUN2/CARHSP1/DKC1/FEN1/SMG8/PDE8A/E2F1/PNPT1/NUDT1/PDE4A/ADA/PABPC1/ABCD1/UNG/RNASEH2A/POP1/DNASE1L2/IKBKE/HAAO	34
BP	GO:0043161	proteasome-mediated ubiquitin-dependent protein catabolic process	31/813	414/18800	0.00221415	0.0368521	0.033477	KCTD5/ZNF598/CCNF/AXIN1/USP7/ELOB/STUB1/PSMD1/SPSB3/PLK1/ANKZF1/SUMO1/FBXL19/ZFAND2B/HFE/KEAP1/AURKA/DTL/CDC20/HSPBP1/PSMD2/FBXO45/GBA/TRAF4/FOXRED2/FBXL18/UBE2C/RNF144B/NHLRC1/ANAPC1/UBE2S	31
BP	GO:0031398	positive regulation of protein ubiquitination	13/813	121/18800	0.00222751	0.0369346	0.033552	AXIN1/STUB1/RPS2/PLK1/RNF40/FANCI/CENPX/CDC20/HSPBP1/UBE2C/NHLRC1/UBE2S/DCUN1D5	13
BP	GO:0042771	intrinsic apoptotic signaling pathway in response to DNA damage by p53 class mediator	7/813	43/18800	0.00227812	0.0374908	0.0340573	AEN/DDIT4/CDIP1/ATAD5/MIF/NUPR1/BRCA2	7
BP	GO:1902686	mitochondrial outer membrane permeabilization involved in programmed cell death	7/813	43/18800	0.00227812	0.0374908	0.0340573	RHOT2/ZNF205/BAX/TMEM14A/CHCHD10/PPIF/MPV17L	7
BP	GO:0002200	somatic diversification of immune receptors	10/813	80/18800	0.0023041	0.0377768	0.0343171	CTNNBL1/HMGB1/EXO1/HSPD1/RNF168/POLQ/HMGB2/PARP3/ATAD5/UNG	10
BP	GO:1903320	regulation of protein modification by small protein conjugation or removal	21/813	246/18800	0.00240794	0.0393327	0.0357304	UBE2I/AXIN1/STUB1/RPS2/PLK1/RNF40/FANCI/CENPX/BUB1B/CDC20/HSPBP1/GTPBP4/HSP90AA1/SOX4/TSPO/UBE2C/MTBP/MAD2L1/NHLRC1/UBE2S/DCUN1D5	21
BP	GO:2000060	positive regulation of ubiquitin-dependent protein catabolic process	12/813	108/18800	0.00244541	0.0396493	0.0360181	AXIN1/ELOB/STUB1/PLK1/SUMO1/KEAP1/AURKA/MAGEF1/CDC20/HSPBP1/GBA/RNF144B	12
BP	GO:0006167	AMP biosynthetic process	4/813	14/18800	0.0024544	0.0396493	0.0360181	ATIC/APRT/ADA/PAICS	4
BP	GO:0051984	positive regulation of chromosome segregation	4/813	14/18800	0.0024544	0.0396493	0.0360181	CDC6/AURKB/CDT1/CCNB1	4
BP	GO:0010833	telomere maintenance via telomere lengthening	10/813	81/18800	0.00252912	0.0407068	0.0369787	TELO2/PARN/SLX4/RAD51/DKC1/NEK2/AURKB/CCT5/HSP90AA1/NAT10	10
BP	GO:0051098	regulation of binding	28/813	366/18800	0.00261128	0.0417591	0.0379347	MAPRE1/ACTB/STUB1/PLK1/SUMO1/BAX/PKD1/TFAP4/CALM2/HMGB1/CPNE1/NME1/E2F1/NEK2/HFE/AURKB/EIF3C/AURKA/HJURP/GMNN/WFIKKN1/GTPBP4/HMGB2/CDT1/H1-0/S100A10/HDAC2/WNT3A	28
BP	GO:0009112	nucleobase metabolic process	6/813	33/18800	0.00261351	0.0417591	0.0379347	UMPS/SHMT2/GMPS/APRT/ADA/PAICS	6
BP	GO:0006473	protein acetylation	19/813	216/18800	0.00271708	0.0432567	0.039295	NAA60/ACTB/BRD7/SGF29/CREBBP/GLYR1/SRCAP/ACTL6A/SMARCB1/SPHK2/NAT10/SOX4/YEATS4/HDAC2/DSCC1/ESCO2/NUPR1/CHEK1/BRCA2	19
BP	GO:0006338	chromatin remodeling	22/813	266/18800	0.00284412	0.0451158	0.0409839	NAA60/ACTB/SMARCD2/OIP5/PSME4/SRCAP/ACTL6A/SMARCB1/HMGA1/HJURP/H4C9/H2BC12/HMGB2/JARID2/H1-0/YEATS4/H4C14/ASF1B/H3C6/HDAC2/CENPW/H2BC7	22
BP	GO:0072659	protein localization to plasma membrane	23/813	283/18800	0.00288246	0.0455594	0.0413869	PDPK1/ACTB/CIB1/RAB40C/VPS35/GORASP2/F11R/MAP7/JUP/SLC9A3R2/PPP1R9B/EZR/CLN3/ACSL3/VAMP8/PIGW/PPP2R5A/S100A10/MYADM/WNT3A/NHLRC1/PDZD3/PRKCZ	23
BP	GO:0045862	positive regulation of proteolysis	28/813	369/18800	0.00293087	0.0461586	0.0419312	AXIN1/ELOB/STUB1/PLK1/SUMO1/HSPE1/BAX/PSME4/PRSS22/TFAP4/RNF40/ADRM1/HMGB1/PACSIN3/KEAP1/AURKA/MAGEF1/HSPD1/MTCH1/CDC20/HSPBP1/GBA/S100A10/HDAC2/FGFR4/RNF144B/WNT3A/NUPR1	28
BP	GO:0045910	negative regulation of DNA recombination	7/813	45/18800	0.00297743	0.046596	0.0423286	BLM/MAGEF1/RMI2/POLQ/H1-0/PARPBP/PARP3	7
BP	GO:0001701	in utero embryonic development	29/813	387/18800	0.00298817	0.046596	0.0423286	AXIN1/RBBP6/ZNF830/EIF2S2/PALB2/PKD1/PLK4/ACTL6A/SMARCB1/NSUN2/RRP7A/NEK2/KEAP1/CAPN2/CCNB2/FLVCR1/ADA/CCNB1/ASF1B/TTLL4/GINS1/E2F8/RRM2/WNT3A/CHEK1/ADCY9/GINS4/BRCA2/SNAI1	29
BP	GO:1901361	organic cyclic compound catabolic process	35/813	494/18800	0.00299046	0.046596	0.0423286	RNPS1/NTHL1/PARN/HMOX2/GSPT1/FASTKD2/EDC3/CNOT11/DCTPP1/FXR1/LSM6/BAX/LSM2/DNASE1/CNP/NSUN2/CARHSP1/DKC1/FEN1/SMG8/PDE8A/E2F1/PNPT1/NUDT1/PDE4A/ADA/PABPC1/ABCD1/UNG/RNASEH2A/POP1/DNASE1L2/IKBKE/HAAO/CYP27A1	35
BP	GO:0034599	cellular response to oxidative stress	23/813	284/18800	0.00301235	0.0467713	0.0424878	GFER/TBC1D24/TRAP1/ANKZF1/PYCR2/PDCD10/ZNF622/PDE8A/PRDX1/VRK2/KEAP1/PNPT1/P4HB/NFE2L1/PYCR1/PPIF/PRDX5/ABCD1/HDAC2/TRPM2/RNF112/ECT2/CDK1	23
BP	GO:0090502	RNA phosphodiester bond hydrolysis, endonucleolytic	10/813	83/18800	0.00303191	0.0469092	0.042613	TBL3/EDC3/KRI1/RPP21/EXO1/FEN1/RPP40/RPP25/RNASEH2A/POP1	10
BP	GO:0061077	chaperone-mediated protein folding	9/813	70/18800	0.00309619	0.0475687	0.0432121	TRAP1/SDF2/PDCL3/HSPE1/UNC45A/SDF2L1/CCT5/HSPH1/UNC45B	9
BP	GO:1901607	alpha-amino acid biosynthetic process	9/813	70/18800	0.00309619	0.0475687	0.0432121	PYCR2/GOT2/SEPHS2/CLN3/SHMT2/PYCR1/OAT/GGT1/PYCR3	9
BP	GO:0009060	aerobic respiration	17/813	187/18800	0.00316425	0.0484451	0.0440083	NDUFB10/IDH2/NDUFAB1/MTFR2/NDUFB3/NDUFS1/SHMT2/COX5A/ANTKMT/CHCHD10/PPIF/CCNB1/NDUFS6/ABCD1/NDUFB9/NUPR1/CDK1	17
BP	GO:1904666	regulation of ubiquitin protein ligase activity	5/813	24/18800	0.00319791	0.0487903	0.0443219	PLK1/CDC20/UBE2C/MAD2L1/UBE2S	5
BP	GO:0045727	positive regulation of translation	14/813	141/18800	0.00321301	0.048823	0.0443516	FASTKD2/CDK5RAP1/COA3/FXR1/EIF6/NGRN/PKM/EIF3C/PLXNB2/MIF4GD/NAT10/SOX4/PABPC1/PLD1	14
BP	GO:0000463	maturation of LSU-rRNA from tricistronic rRNA transcript (SSU-rRNA, 5.8S rRNA, LSU-rRNA)	4/813	15/18800	0.00323338	0.048823	0.0443516	NIFK/WDR12/DDX18/GTPBP4	4
BP	GO:0070131	positive regulation of mitochondrial translation	4/813	15/18800	0.00323338	0.048823	0.0443516	FASTKD2/CDK5RAP1/COA3/NGRN	4
BP	GO:1990778	protein localization to cell periphery	26/813	337/18800	0.00325464	0.0489757	0.0444903	PDPK1/ACTB/CIB1/RAB40C/VPS35/GORASP2/PLK1/F11R/MAP7/JUP/SLC9A3R2/PPP1R9B/EZR/CLN3/ACSL3/VAMP8/PIGW/CLSTN1/PPP2R5A/S100A10/MYADM/WNT3A/NHLRC1/PDZD3/SAPCD2/PRKCZ	26
BP	GO:0035794	positive regulation of mitochondrial membrane permeability	7/813	46/18800	0.00338334	0.0507385	0.0460917	RHOT2/ZNF205/BAX/TMEM14A/CHCHD10/PPIF/MPV17L	7
BP	GO:0000281	mitotic cytokinesis	9/813	71/18800	0.00341278	0.051006	0.0463347	STAMBP/CHMP4B/PLK1/KIF23/RACGAP1/ANLN/INCENP/CEP55/ECT2	9
BP	GO:0007095	mitotic G2 DNA damage checkpoint signaling	6/813	35/18800	0.0035596	0.0528409	0.0480015	PLK1/TICRR/BLM/DTL/CHEK1/CDK1	6
BP	GO:0097345	mitochondrial outer membrane permeabilization	6/813	35/18800	0.0035596	0.0528409	0.0480015	RHOT2/ZNF205/BAX/TMEM14A/CHCHD10/MPV17L	6
BP	GO:0006165	nucleoside diphosphate phosphorylation	11/813	99/18800	0.00364459	0.0539204	0.0489821	JMJD8/EIF6/ALDOA/NME1/DDIT4/PKM/FOXK1/NME3/PFKFB2/NME4/NUPR1	11
BP	GO:0061136	regulation of proteasomal protein catabolic process	17/813	190/18800	0.00372547	0.054932	0.0499011	AXIN1/USP7/ELOB/STUB1/RHBDF1/PLK1/SUMO1/PKD1/RNF40/HFE/KEAP1/AURKA/CDC20/HSPBP1/GBA/RNF144B/NUPR1	17
BP	GO:0046039	GTP metabolic process	5/813	25/18800	0.00385715	0.0565852	0.0514029	OPA1/IMPDH1/NME1/NME3/NME4	5
BP	GO:1903050	regulation of proteolysis involved in cellular protein catabolic process	19/813	223/18800	0.00386335	0.0565852	0.0514029	AXIN1/USP7/ELOB/STUB1/RHBDF1/PLK1/PDCL3/SUMO1/PKD1/RNF40/HFE/KEAP1/AURKA/MAGEF1/CDC20/HSPBP1/GBA/RNF144B/NUPR1	19
BP	GO:0046939	nucleotide phosphorylation	11/813	100/18800	0.00393932	0.0575063	0.0522396	JMJD8/EIF6/ALDOA/NME1/DDIT4/PKM/FOXK1/NME3/PFKFB2/NME4/NUPR1	11
BP	GO:0006266	DNA ligation	4/813	16/18800	0.00416518	0.0602835	0.0547625	HMGB1/LIG1/RAD51/PARP3	4
BP	GO:0099116	tRNA 5'-end processing	4/813	16/18800	0.00416518	0.0602835	0.0547625	RPP21/RPP40/RPP25/POP1	4
BP	GO:0009132	nucleoside diphosphate metabolic process	13/813	130/18800	0.00417073	0.0602835	0.0547625	JMJD8/EIF6/ALDOA/UMPS/NME1/DDIT4/PKM/FOXK1/NME3/PFKFB2/NME4/RRM2/NUPR1	13
BP	GO:0043543	protein acylation	21/813	258/18800	0.00421353	0.0607025	0.0551431	NAA60/ACTB/BRD7/SGF29/CREBBP/GLYR1/SRCAP/ACTL6A/SMARCB1/SPHK2/NAT10/CDYL/SOX4/YEATS4/HDAC2/DSCC1/ESCO2/NUPR1/CHEK1/ZDHHC4/BRCA2	21
BP	GO:0009144	purine nucleoside triphosphate metabolic process	10/813	87/18800	0.00427517	0.0613892	0.0557669	ATP6V0C/ALDOA/OPA1/SPHK2/IMPDH1/NME1/ANTKMT/NME3/ADA/NME4	10
BP	GO:0022616	DNA strand elongation	6/813	37/18800	0.00473883	0.0677641	0.0615579	ACTL6A/LIG1/RFC3/RFC4/MCM3/GINS1	6
BP	GO:0051259	protein complex oligomerization	20/813	244/18800	0.00476538	0.0677641	0.0615579	KCTD5/VPS35/TK1/ALDOA/MAT2A/PKD1/OPA1/BLM/SHMT2/PNPT1/ATL2/POLQ/HSD17B8/MIF/TRPM2/RRM2/RNF112/KCNA7/ABCA3/ECT2	20
BP	GO:0090305	nucleic acid phosphodiester bond hydrolysis	20/813	244/18800	0.00476538	0.0677641	0.0615579	TBL3/NTHL1/PARN/POLR3K/EME1/EDC3/AEN/KRI1/EME2/RPP21/POLG/EXO1/FEN1/PNPT1/RPP40/RPP25/ATAD5/RNASEH2A/NEIL3/POP1	20
BP	GO:1903076	regulation of protein localization to plasma membrane	11/813	103/18800	0.00493902	0.0700066	0.0635951	PDPK1/ACTB/CIB1/PPP1R9B/EZR/CLN3/ACSL3/VAMP8/PPP2R5A/WNT3A/NHLRC1	11
BP	GO:1903578	regulation of ATP metabolic process	10/813	89/18800	0.00503169	0.0710908	0.06458	JMJD8/EIF6/SPHK2/DDIT4/SHMT2/ANTKMT/PPIF/TSPO/ABCD1/NUPR1	10
BP	GO:0046902	regulation of mitochondrial membrane permeability	8/813	62/18800	0.00506088	0.0712741	0.0647465	RHOT2/ZNF205/BAX/CNP/TMEM14A/CHCHD10/PPIF/MPV17L	8
BP	GO:0062197	cellular response to chemical stress	25/813	332/18800	0.00525479	0.0724889	0.06585	GFER/TBC1D24/TRAP1/ANKZF1/PYCR2/PDCD10/ZNF622/CLN3/PDE8A/PRDX1/VRK2/KEAP1/PNPT1/P4HB/NFE2L1/PYCR1/PPIF/TSPO/PRDX5/ABCD1/HDAC2/TRPM2/RNF112/ECT2/CDK1	25
BP	GO:0000712	resolution of meiotic recombination intermediates	4/813	17/18800	0.00526262	0.0724889	0.06585	SLX4/EME1/EME2/CENPX	4
BP	GO:0036342	post-anal tail morphogenesis	4/813	17/18800	0.00526262	0.0724889	0.06585	AXIN1/PALB2/WNT3A/TCF15	4
BP	GO:0090231	regulation of spindle checkpoint	4/813	17/18800	0.00526262	0.0724889	0.06585	LCMT1/CDT1/CCNB1/MAD2L1	4
BP	GO:0090266	regulation of mitotic cell cycle spindle assembly checkpoint	4/813	17/18800	0.00526262	0.0724889	0.06585	LCMT1/CDT1/CCNB1/MAD2L1	4
BP	GO:1903504	regulation of mitotic spindle checkpoint	4/813	17/18800	0.00526262	0.0724889	0.06585	LCMT1/CDT1/CCNB1/MAD2L1	4
BP	GO:1990403	embryonic brain development	4/813	17/18800	0.00526262	0.0724889	0.06585	MKS1/IFT140/PPIL1/RNF112	4
BP	GO:0043467	regulation of generation of precursor metabolites and energy	13/813	134/18800	0.0053899	0.0738568	0.0670927	TRAP1/JMJD8/TACO1/EIF6/SPHK2/DDIT4/SHMT2/PNPT1/PPIF/CCNB1/ABCD1/NUPR1/CDK1	13
BP	GO:0008652	cellular amino acid biosynthetic process	9/813	76/18800	0.00539555	0.0738568	0.0670927	PYCR2/GOT2/SEPHS2/CLN3/SHMT2/PYCR1/OAT/GGT1/PYCR3	9
BP	GO:0000387	spliceosomal snRNP assembly	7/813	50/18800	0.00544081	0.0742452	0.0674455	SNRPD3/SNRPG/LSM2/SNRPC/COIL/SNRPE/SMN1	7
BP	GO:2000058	regulation of ubiquitin-dependent protein catabolic process	15/813	166/18800	0.00567985	0.077267	0.0701906	AXIN1/USP7/ELOB/STUB1/PLK1/PDCL3/SUMO1/HFE/KEAP1/AURKA/MAGEF1/CDC20/HSPBP1/GBA/RNF144B	15
BP	GO:0090559	regulation of membrane permeability	9/813	77/18800	0.00588153	0.0797637	0.0724586	RHOT2/ZNF205/F11R/BAX/CNP/TMEM14A/CHCHD10/PPIF/MPV17L	9
BP	GO:0006479	protein methylation	17/813	199/18800	0.00592017	0.0797951	0.0724872	EEF2KMT/SNRPD3/SETD1A/GSPT1/CREBBP/PWP1/SMYD5/LCMT1/METTL22/NELFE/SMARCB1/DPY30/SMYD2/DNMT3B/JARID2/ANTKMT/PAGR1	17
BP	GO:0008213	protein alkylation	17/813	199/18800	0.00592017	0.0797951	0.0724872	EEF2KMT/SNRPD3/SETD1A/GSPT1/CREBBP/PWP1/SMYD5/LCMT1/METTL22/NELFE/SMARCB1/DPY30/SMYD2/DNMT3B/JARID2/ANTKMT/PAGR1	17
BP	GO:0034250	positive regulation of cellular amide metabolic process	15/813	167/18800	0.00599891	0.0806092	0.0732267	FASTKD2/CDK5RAP1/COA3/FXR1/EIF6/NGRN/SPHK2/PKM/EIF3C/PLXNB2/MIF4GD/NAT10/SOX4/PABPC1/PLD1	15
BP	GO:1905710	positive regulation of membrane permeability	7/813	51/18800	0.00607656	0.0814037	0.0739484	RHOT2/ZNF205/BAX/TMEM14A/CHCHD10/PPIF/MPV17L	7
BP	GO:0045732	positive regulation of protein catabolic process	19/813	233/18800	0.00617213	0.0823212	0.0747819	AXIN1/ELOB/STUB1/VPS35/PLK1/SUMO1/RNF40/EZR/PACSIN3/KEAP1/AURKA/DTL/MAGEF1/CDC20/HSPBP1/HSP90AA1/GBA/RNF144B/NUPR1	19
BP	GO:0032506	cytokinetic process	6/813	39/18800	0.00618252	0.0823212	0.0747819	CHMP4B/AURKB/RACGAP1/ANLN/CEP55/ECT2	6
BP	GO:0007064	mitotic sister chromatid cohesion	5/813	28/18800	0.00641175	0.0851156	0.0773203	CDC20/SGO1/HASPIN/CDCA5/DSCC1	5
BP	GO:0032434	regulation of proteasomal ubiquitin-dependent protein catabolic process	13/813	137/18800	0.00647925	0.0854976	0.0776674	AXIN1/USP7/ELOB/STUB1/PLK1/SUMO1/HFE/KEAP1/AURKA/CDC20/HSPBP1/GBA/RNF144B	13
BP	GO:0001522	pseudouridine synthesis	4/813	18/18800	0.00653782	0.0854976	0.0776674	TSR3/RPUSD1/RPUSD2/DKC1	4
BP	GO:0034244	negative regulation of transcription elongation from RNA polymerase II promoter	4/813	18/18800	0.00653782	0.0854976	0.0776674	AXIN1/NELFE/SUPT4H1/RNF168	4
BP	GO:0051382	kinetochore assembly	4/813	18/18800	0.00653782	0.0854976	0.0776674	CENPX/KNTC1/CENPF/CENPW	4
BP	GO:0051782	negative regulation of cell division	4/813	18/18800	0.00653782	0.0854976	0.0776674	ORC6/BLM/AURKB/E2F8	4
BP	GO:0008637	apoptotic mitochondrial changes	11/813	107/18800	0.006573	0.0857026	0.0778536	RHOT2/ZNF205/VPS35/BAX/OPA1/NDUFS1/TMEM14A/HSPD1/CHCHD10/PPIF/MPV17L	11
BP	GO:0006399	tRNA metabolic process	16/813	185/18800	0.00663768	0.0862898	0.078387	GATB/POLR3K/EARS2/CDK5RAP1/IARS2/MOCS3/LSM6/METTL2A/NSUN2/RPP21/GTF3C6/EPRS1/NAT10/RPP40/RPP25/POP1	16
BP	GO:0015980	energy derivation by oxidation of organic compounds	24/813	321/18800	0.00671401	0.0870247	0.0790546	NDUFB10/TRAP1/IDH2/NDUFAB1/MTFR2/NDUFB3/NDUFS1/SHMT2/ETFA/COX5A/PNPT1/GBA/ANTKMT/CHCHD10/PHKB/PPIF/CCNB1/NDUFS6/ABCD1/NDUFB9/NHLRC1/NUPR1/MTLN/CDK1	24
BP	GO:0006220	pyrimidine nucleotide metabolic process	7/813	52/18800	0.0067661	0.0871854	0.0792006	NTHL1/DCTPP1/UMPS/NME1/NME3/NME4/UNG	7
BP	GO:0043392	negative regulation of DNA binding	7/813	52/18800	0.0067661	0.0871854	0.0792006	SUMO1/TFAP4/CPNE1/E2F1/NEK2/WFIKKN1/HDAC2	7
BP	GO:0072332	intrinsic apoptotic signaling pathway by p53 class mediator	9/813	79/18800	0.00695408	0.0893457	0.081163	AEN/BAX/DDIT4/E2F1/CDIP1/ATAD5/MIF/NUPR1/BRCA2	9
BP	GO:0044282	small molecule catabolic process	27/813	376/18800	0.00713239	0.0913695	0.0830015	AMDHD2/HAGH/ECI1/GOT2/DECR2/BCKDK/SHMT2/ETFA/BLMH/FOXK1/NUDT1/OAT/ADA/HYKK/PFKFB2/XYLB/ALDH1B1/ABCD1/EHHADH/SULT1A1/IVD/MTLN/TST/MCCC1/GALM/HAAO/CYP27A1	27
BP	GO:0002934	desmosome organization	3/813	10/18800	0.00769562	0.0971683	0.0882692	JUP/NECTIN1/DSP	3
BP	GO:0006228	UTP biosynthetic process	3/813	10/18800	0.00769562	0.0971683	0.0882692	NME1/NME3/NME4	3
BP	GO:0033314	mitotic DNA replication checkpoint signaling	3/813	10/18800	0.00769562	0.0971683	0.0882692	ZNF830/TICRR/CDC6	3
BP	GO:0150172	regulation of phosphatidylcholine metabolic process	3/813	10/18800	0.00769562	0.0971683	0.0882692	ACSL3/CAPN2/ABCA3	3
BP	GO:1901838	positive regulation of transcription of nucleolar large rRNA by RNA polymerase I	3/813	10/18800	0.00769562	0.0971683	0.0882692	PWP1/NCL/SMARCB1	3
BP	GO:1903322	positive regulation of protein modification by small protein conjugation or removal	13/813	140/18800	0.00773673	0.0974074	0.0884864	AXIN1/STUB1/RPS2/PLK1/RNF40/FANCI/CENPX/CDC20/HSPBP1/UBE2C/NHLRC1/UBE2S/DCUN1D5	13
BP	GO:0051168	nuclear export	14/813	156/18800	0.007836	0.0983754	0.0893657	THOC6/RAE1/NUP93/XPO6/EIF6/PKD1/LTV1/LSG1/NUP107/RANGAP1/CSE1L/NSUN2/ALYREF/THOC3	14
BP	GO:1902110	positive regulation of mitochondrial membrane permeability involved in apoptotic process	6/813	41/18800	0.00792202	0.099172	0.0900894	RHOT2/ZNF205/BAX/TMEM14A/CHCHD10/MPV17L	6
BP	GO:0000028	ribosomal small subunit assembly	4/813	19/18800	0.00800216	0.0993262	0.0902295	MRPS11/ERAL1/MRPS7/RRP7A	4
BP	GO:0032785	negative regulation of DNA-templated transcription, elongation	4/813	19/18800	0.00800216	0.0993262	0.0902295	AXIN1/NELFE/SUPT4H1/RNF168	4
BP	GO:2000042	negative regulation of double-strand break repair via homologous recombination	4/813	19/18800	0.00800216	0.0993262	0.0902295	MAGEF1/RMI2/POLQ/PARPBP	4
BP	GO:0006334	nucleosome assembly	12/813	126/18800	0.00846797	0.104812	0.0952129	NAA60/OIP5/HJURP/H4C9/H2BC12/HMGB2/H1-0/H4C14/ASF1B/H3C6/CENPW/H2BC7	12
BP	GO:1902414	protein localization to cell junction	10/813	96/18800	0.00853365	0.105328	0.0956818	ACTB/VPS35/F11R/MAPK8IP3/MARVELD3/VCL/CLSTN1/NECTIN1/PRKCZ/DSP	10
BP	GO:0009141	nucleoside triphosphate metabolic process	11/813	111/18800	0.00860277	0.105884	0.0961866	ATP6V0C/DCTPP1/ALDOA/OPA1/SPHK2/IMPDH1/NME1/ANTKMT/NME3/ADA/NME4	11
BP	GO:0000132	establishment of mitotic spindle orientation	5/813	30/18800	0.00865962	0.106286	0.0965518	PLK1/DCTN1/NDE1/MAD2L1/SAPCD2	5
BP	GO:0009206	purine ribonucleoside triphosphate biosynthetic process	8/813	68/18800	0.00883018	0.107549	0.097699	ATP6V0C/ALDOA/SPHK2/IMPDH1/NME1/ANTKMT/NME3/NME4	8
BP	GO:0009205	purine ribonucleoside triphosphate metabolic process	9/813	82/18800	0.00883593	0.107549	0.097699	ATP6V0C/ALDOA/OPA1/SPHK2/IMPDH1/NME1/ANTKMT/NME3/NME4	9
BP	GO:2001021	negative regulation of response to DNA damage stimulus	9/813	82/18800	0.00883593	0.107549	0.097699	NUDT16L1/MAGEF1/RMI2/POLQ/PARPBP/ATAD5/MIF/DDIAS/SNAI1	9
BP	GO:0009167	purine ribonucleoside monophosphate metabolic process	6/813	42/18800	0.00891238	0.10818	0.0982721	ATIC/IMPDH1/GMPS/APRT/ADA/PAICS	6
BP	GO:0018022	peptidyl-lysine methylation	13/813	143/18800	0.00917932	0.111113	0.100937	EEF2KMT/SETD1A/PWP1/SMYD5/METTL22/NELFE/SMARCB1/DPY30/SMYD2/DNMT3B/JARID2/ANTKMT/PAGR1	13
BP	GO:0042542	response to hydrogen peroxide	12/813	128/18800	0.00954856	0.115185	0.104636	TRAP1/ANKZF1/PDCD10/PDE8A/CAPN2/PYCR1/PPIF/HDAC2/TRPM2/RNF112/ECT2/CDK1	12
BP	GO:0007004	telomere maintenance via telomerase	8/813	69/18800	0.00962061	0.115185	0.104636	TELO2/PARN/DKC1/NEK2/AURKB/CCT5/HSP90AA1/NAT10	8
BP	GO:0009145	purine nucleoside triphosphate biosynthetic process	8/813	69/18800	0.00962061	0.115185	0.104636	ATP6V0C/ALDOA/SPHK2/IMPDH1/NME1/ANTKMT/NME3/NME4	8
BP	GO:0016445	somatic diversification of immunoglobulins	8/813	69/18800	0.00962061	0.115185	0.104636	CTNNBL1/EXO1/HSPD1/RNF168/POLQ/PARP3/ATAD5/UNG	8
BP	GO:0061484	hematopoietic stem cell homeostasis	4/813	20/18800	0.00966615	0.115416	0.104846	ADGRG1/SOX4/GLIS2/FOXA3	4
BP	GO:0022904	respiratory electron transport chain	11/813	113/18800	0.00978434	0.116511	0.10584	NDUFB10/NDUFAB1/NDUFB3/NDUFS1/ETFA/COX5A/GBA/CCNB1/NDUFS6/NDUFB9/CDK1	11
BP	GO:0036473	cell death in response to oxidative stress	10/813	98/18800	0.00981518	0.116562	0.105887	GFER/TBC1D24/TRAP1/PDCD10/ZNF622/PDE8A/P4HB/PYCR1/TRPM2/RNF112	10
BP	GO:0017038	protein import	17/813	210/18800	0.00991971	0.117348	0.106601	TSC2/TOMM22/NUP93/DNAJC19/SUMO1/HEATR3/JUP/NUP107/CSE1L/TIMM17A/RANBP2/HSPD1/HSP90AA1/KPNA2/IPO5/ECT2/CDK1	17
BP	GO:0006506	GPI anchor biosynthetic process	5/813	31/18800	0.00996537	0.117348	0.106601	PIGQ/DPM1/PIGU/PIGW/PIGZ	5
BP	GO:0045737	positive regulation of cyclin-dependent protein serine/threonine kinase activity	5/813	31/18800	0.00996537	0.117348	0.106601	CKS1B/PKD1/CDC6/CCNYL1/CCNB1	5
BP	GO:0071364	cellular response to epidermal growth factor stimulus	6/813	43/18800	0.00998821	0.117348	0.106601	PDPK1/NCL/KNSTRN/PPP1R9B/PDE8A/IQGAP1	6
BP	GO:0006188	IMP biosynthetic process	3/813	11/18800	0.0102448	0.11909	0.108183	ATIC/APRT/PAICS	3
BP	GO:0031055	chromatin remodeling at centromere	3/813	11/18800	0.0102448	0.11909	0.108183	OIP5/HJURP/CENPW	3
BP	GO:0060623	regulation of chromosome condensation	3/813	11/18800	0.0102448	0.11909	0.108183	NCAPH/NCAPG/SMC4	3
BP	GO:2000615	regulation of histone H3-K9 acetylation	3/813	11/18800	0.0102448	0.11909	0.108183	SMARCB1/SPHK2/CHEK1	3
BP	GO:0002562	somatic diversification of immune receptors via germline recombination within a single locus	8/813	70/18800	0.0104625	0.120979	0.109899	HMGB1/EXO1/HSPD1/RNF168/HMGB2/PARP3/ATAD5/UNG	8
BP	GO:0016444	somatic cell DNA recombination	8/813	70/18800	0.0104625	0.120979	0.109899	HMGB1/EXO1/HSPD1/RNF168/HMGB2/PARP3/ATAD5/UNG	8
BP	GO:0006417	regulation of translation	31/813	463/18800	0.0109492	0.126276	0.114711	ZNF598/TRAP1/PARN/EIF5B/GSPT1/FASTKD2/NCL/CDK5RAP1/CNOT11/COA3/TACO1/CNOT9/FXR1/EIF6/NGRN/MRPL13/MTIF2/BZW2/SHMT2/EPRS1/PKM/EIF3C/PLXNB2/PNPT1/MIF4GD/NAT10/GRB7/SOX4/PABPC1/YBX2/PLD1	31
BP	GO:0044380	protein localization to cytoskeleton	7/813	57/18800	0.0111127	0.127826	0.116119	MAPRE1/PPP1R9B/AURKA/SPAG5/GAS2L1/TTK/FAM83D	7
BP	GO:0009126	purine nucleoside monophosphate metabolic process	6/813	44/18800	0.0111532	0.127956	0.116237	ATIC/IMPDH1/GMPS/APRT/ADA/PAICS	6
BP	GO:0061640	cytoskeleton-dependent cytokinesis	10/813	100/18800	0.0112384	0.128598	0.11682	STAMBP/CHMP4B/PLK1/AURKB/KIF23/RACGAP1/ANLN/INCENP/CEP55/ECT2	10
BP	GO:0006505	GPI anchor metabolic process	5/813	32/18800	0.0114	0.128677	0.116892	PIGQ/DPM1/PIGU/PIGW/PIGZ	5
BP	GO:0036474	cell death in response to hydrogen peroxide	5/813	32/18800	0.0114	0.128677	0.116892	TRAP1/PDCD10/PDE8A/PYCR1/RNF112	5
BP	GO:0043304	regulation of mast cell degranulation	5/813	32/18800	0.0114	0.128677	0.116892	PDPK1/SPHK2/VAMP8/FES/ADORA2B	5
BP	GO:0051642	centrosome localization	5/813	32/18800	0.0114	0.128677	0.116892	NDE1/EZR/RANBP2/AURKA/MAD2L1	5
BP	GO:0071168	protein localization to chromatin	5/813	32/18800	0.0114	0.128677	0.116892	SGF29/PLK1/JARID2/CDCA5/ESCO2	5
BP	GO:0034614	cellular response to reactive oxygen species	13/813	147/18800	0.011421	0.128677	0.116892	TRAP1/ANKZF1/PDCD10/PDE8A/PRDX1/PYCR1/PPIF/PRDX5/HDAC2/TRPM2/RNF112/ECT2/CDK1	13
BP	GO:0002902	regulation of B cell apoptotic process	4/813	21/18800	0.0115395	0.129348	0.117502	BAX/AURKB/ADA/MIF	4
BP	GO:0150105	protein localization to cell-cell junction	4/813	21/18800	0.0115395	0.129348	0.117502	ACTB/F11R/VCL/DSP	4
BP	GO:0009166	nucleotide catabolic process	8/813	72/18800	0.0123081	0.137613	0.125009	NTHL1/DCTPP1/CNP/PDE8A/PDE4A/ADA/ABCD1/UNG	8
BP	GO:0051100	negative regulation of binding	14/813	165/18800	0.0124934	0.13933	0.126569	ACTB/STUB1/SUMO1/BAX/TFAP4/CPNE1/E2F1/NEK2/HFE/AURKB/AURKA/WFIKKN1/GTPBP4/HDAC2	14
BP	GO:0061842	microtubule organizing center localization	5/813	33/18800	0.0129691	0.144268	0.131056	NDE1/EZR/RANBP2/AURKA/MAD2L1	5
BP	GO:0044771	meiotic cell cycle phase transition	3/813	12/18800	0.0132262	0.14602	0.132647	CCNB2/TTK/CDC25A	3
BP	GO:0046051	UTP metabolic process	3/813	12/18800	0.0132262	0.14602	0.132647	NME1/NME3/NME4	3
BP	GO:0098911	regulation of ventricular cardiac muscle cell action potential	3/813	12/18800	0.0132262	0.14602	0.132647	JUP/BIN1/DSP	3
BP	GO:0009161	ribonucleoside monophosphate metabolic process	7/813	59/18800	0.0133194	0.14668	0.133246	ATIC/UMPS/IMPDH1/GMPS/APRT/ADA/PAICS	7
BP	GO:1901796	regulation of signal transduction by p53 class mediator	10/813	103/18800	0.0136593	0.150047	0.136305	USP7/C16orf72/AURKB/AURKA/SMYD2/SOX4/ATAD5/MIF/CHEK1/SNAI1	10
BP	GO:0022900	electron transport chain	14/813	167/18800	0.0137726	0.150915	0.137094	NDUFB10/NDUFAB1/NDUFB3/CYB561/NDUFS1/ETFA/COX5A/GBA/DEGS1/CCNB1/NDUFS6/NDUFB9/CDK1/HAAO	14
BP	GO:0018394	peptidyl-lysine acetylation	15/813	184/18800	0.0139897	0.152912	0.138907	NAA60/ACTB/BRD7/SGF29/CREBBP/GLYR1/SRCAP/ACTL6A/SMARCB1/SPHK2/SOX4/YEATS4/HDAC2/CHEK1/BRCA2	15
BP	GO:0009201	ribonucleoside triphosphate biosynthetic process	8/813	74/18800	0.0143821	0.156811	0.14245	ATP6V0C/ALDOA/SPHK2/IMPDH1/NME1/ANTKMT/NME3/NME4	8
BP	GO:1903078	positive regulation of protein localization to plasma membrane	7/813	60/18800	0.0145331	0.157208	0.142811	PDPK1/CIB1/PPP1R9B/EZR/CLN3/ACSL3/WNT3A	7
BP	GO:0009303	rRNA transcription	5/813	34/18800	0.0146776	0.157208	0.142811	PWP1/NCL/NIFK/SMARCB1/GTF3C6	5
BP	GO:0032212	positive regulation of telomere maintenance via telomerase	5/813	34/18800	0.0146776	0.157208	0.142811	PARN/DKC1/NEK2/AURKB/CCT5	5
BP	GO:0033006	regulation of mast cell activation involved in immune response	5/813	34/18800	0.0146776	0.157208	0.142811	PDPK1/SPHK2/VAMP8/FES/ADORA2B	5
BP	GO:0051973	positive regulation of telomerase activity	5/813	34/18800	0.0146776	0.157208	0.142811	PARN/DKC1/NEK2/AURKB/HSP90AA1	5
BP	GO:1901976	regulation of cell cycle checkpoint	5/813	34/18800	0.0146776	0.157208	0.142811	LCMT1/CDT1/RFWD3/CCNB1/MAD2L1	5
BP	GO:2000780	negative regulation of double-strand break repair	5/813	34/18800	0.0146776	0.157208	0.142811	NUDT16L1/MAGEF1/RMI2/POLQ/PARPBP	5
BP	GO:0009199	ribonucleoside triphosphate metabolic process	9/813	89/18800	0.0147047	0.157208	0.142811	ATP6V0C/ALDOA/OPA1/SPHK2/IMPDH1/NME1/ANTKMT/NME3/NME4	9
BP	GO:0090501	RNA phosphodiester bond hydrolysis	13/813	152/18800	0.0147945	0.157784	0.143334	TBL3/PARN/POLR3K/EDC3/KRI1/RPP21/EXO1/FEN1/PNPT1/RPP40/RPP25/RNASEH2A/POP1	13
BP	GO:0051972	regulation of telomerase activity	6/813	47/18800	0.0152191	0.161528	0.146735	PARN/DKC1/NEK2/AURKB/HSP90AA1/PARP3	6
BP	GO:0070849	response to epidermal growth factor	6/813	47/18800	0.0152191	0.161528	0.146735	PDPK1/NCL/KNSTRN/PPP1R9B/PDE8A/IQGAP1	6
BP	GO:1901605	alpha-amino acid metabolic process	16/813	203/18800	0.0153133	0.162137	0.147287	PYCR2/GOT2/SEPHS2/CLN3/SHMT2/BLMH/GMPS/PYCR1/OAT/HYKK/GGT1/PYCR3/IVD/TST/MCCC1/HAAO	16
BP	GO:0006278	RNA-templated DNA biosynthetic process	8/813	75/18800	0.0155094	0.163818	0.148815	TELO2/PARN/DKC1/NEK2/AURKB/CCT5/HSP90AA1/NAT10	8
BP	GO:1901657	glycosyl compound metabolic process	9/813	90/18800	0.0157334	0.165664	0.150492	ATIC/TK1/UMPS/FUCA2/NUDT1/GBA/APRT/ADA/NME4	9
BP	GO:1904356	regulation of telomere maintenance via telomere lengthening	7/813	61/18800	0.0158237	0.165664	0.150492	PARN/SLX4/DKC1/NEK2/AURKB/CCT5/NAT10	7
BP	GO:0009220	pyrimidine ribonucleotide biosynthetic process	4/813	23/18800	0.0159481	0.165664	0.150492	UMPS/NME1/NME3/NME4	4
BP	GO:0010155	regulation of proton transport	4/813	23/18800	0.0159481	0.165664	0.150492	TACO1/SPHK2/ANTKMT/PPIF	4
BP	GO:0043968	histone H2A acetylation	4/813	23/18800	0.0159481	0.165664	0.150492	ACTB/ACTL6A/SPHK2/YEATS4	4
BP	GO:0045943	positive regulation of transcription by RNA polymerase I	4/813	23/18800	0.0159481	0.165664	0.150492	PWP1/NCL/SMARCB1/LYAR	4
BP	GO:0051131	chaperone-mediated protein complex assembly	4/813	23/18800	0.0159481	0.165664	0.150492	STUB1/HSPD1/HSP90AA1/PTGES3L	4
BP	GO:0051260	protein homooligomerization	15/813	187/18800	0.0160053	0.165867	0.150676	KCTD5/VPS35/TK1/ALDOA/BLM/SHMT2/PNPT1/ATL2/POLQ/MIF/TRPM2/RNF112/KCNA7/ABCA3/ECT2	15
BP	GO:0000460	maturation of 5.8S rRNA	5/813	35/18800	0.0165306	0.169349	0.153839	EIF6/RRP15/KRI1/WDR12/RPP40	5
BP	GO:0040001	establishment of mitotic spindle localization	5/813	35/18800	0.0165306	0.169349	0.153839	PLK1/DCTN1/NDE1/MAD2L1/SAPCD2	5
BP	GO:1904031	positive regulation of cyclin-dependent protein kinase activity	5/813	35/18800	0.0165306	0.169349	0.153839	CKS1B/PKD1/CDC6/CCNYL1/CCNB1	5
BP	GO:0006997	nucleus organization	12/813	138/18800	0.0166397	0.169349	0.153839	UBE2I/CHMP4B/NUP93/PLK1/SUMO1/DCTN1/PSME4/NUP107/HMGB2/BIN1/CHEK1/CDK1	12
BP	GO:0007144	female meiosis I	3/813	13/18800	0.0166497	0.169349	0.153839	AURKA/CCNB2/TRIP13	3
BP	GO:0009214	cyclic nucleotide catabolic process	3/813	13/18800	0.0166497	0.169349	0.153839	CNP/PDE8A/PDE4A	3
BP	GO:0043970	histone H3-K9 acetylation	3/813	13/18800	0.0166497	0.169349	0.153839	SMARCB1/SPHK2/CHEK1	3
BP	GO:0072520	seminiferous tubule development	3/813	13/18800	0.0166497	0.169349	0.153839	KIF18A/ADGRG1/BRIP1	3
BP	GO:0048146	positive regulation of fibroblast proliferation	6/813	48/18800	0.0167761	0.169848	0.154293	CDC6/E2F1/CDK4/CCNA2/CCNB1/MIF	6
BP	GO:1902108	regulation of mitochondrial membrane permeability involved in apoptotic process	6/813	48/18800	0.0167761	0.169848	0.154293	RHOT2/ZNF205/BAX/TMEM14A/CHCHD10/MPV17L	6
BP	GO:0006406	mRNA export from nucleus	7/813	62/18800	0.0171935	0.173674	0.157768	THOC6/RAE1/NUP93/NUP107/NSUN2/ALYREF/THOC3	7
BP	GO:1905475	regulation of protein localization to membrane	14/813	172/18800	0.0174134	0.175492	0.159419	PDPK1/ACTB/CIB1/MESD/PPP1R9B/EZR/CLN3/ACSL3/VAMP8/PPP2R5A/WNT3A/GPC1/NHLRC1/PRKCZ	14
BP	GO:0031109	microtubule polymerization or depolymerization	11/813	123/18800	0.0176601	0.177571	0.161309	MAPRE1/CIB1/DCTN1/NDE1/SKA3/TPX2/TUBG1/KIF18A/KIF18B/GAS2L1/FES	11
BP	GO:0042773	ATP synthesis coupled electron transport	9/813	92/18800	0.0179475	0.179638	0.163186	NDUFB10/NDUFAB1/NDUFB3/NDUFS1/COX5A/CCNB1/NDUFS6/NDUFB9/CDK1	9
BP	GO:0042775	mitochondrial ATP synthesis coupled electron transport	9/813	92/18800	0.0179475	0.179638	0.163186	NDUFB10/NDUFAB1/NDUFB3/NDUFS1/COX5A/CCNB1/NDUFS6/NDUFB9/CDK1	9
BP	GO:0016054	organic acid catabolic process	18/813	242/18800	0.018146	0.181212	0.164616	AMDHD2/ECI1/GOT2/DECR2/BCKDK/SHMT2/ETFA/BLMH/OAT/HYKK/XYLB/ABCD1/EHHADH/IVD/MTLN/TST/MCCC1/HAAO	18
BP	GO:0000959	mitochondrial RNA metabolic process	6/813	49/18800	0.0184393	0.182175	0.165491	EARS2/FASTKD2/CDK5RAP1/PNPT1/CHCHD10/MRPL12	6
BP	GO:0002082	regulation of oxidative phosphorylation	4/813	24/18800	0.0184981	0.182175	0.165491	SHMT2/PPIF/ABCD1/NUPR1	4
BP	GO:1901028	regulation of mitochondrial outer membrane permeabilization involved in apoptotic signaling pathway	4/813	24/18800	0.0184981	0.182175	0.165491	ZNF205/TMEM14A/CHCHD10/MPV17L	4
BP	GO:0045652	regulation of megakaryocyte differentiation	5/813	36/18800	0.0185326	0.182175	0.165491	CIB1/EIF6/H4C9/HMGB2/H4C14	5
BP	GO:0045738	negative regulation of DNA repair	5/813	36/18800	0.0185326	0.182175	0.165491	NUDT16L1/MAGEF1/RMI2/POLQ/PARPBP	5
BP	GO:0051294	establishment of spindle orientation	5/813	36/18800	0.0185326	0.182175	0.165491	PLK1/DCTN1/NDE1/MAD2L1/SAPCD2	5
BP	GO:0071312	cellular response to alkaloid	5/813	36/18800	0.0185326	0.182175	0.165491	PPP1R9B/BLM/RAD51/CCNA2/CHEK1	5
BP	GO:0009064	glutamine family amino acid metabolic process	8/813	78/18800	0.0192738	0.188617	0.171343	PYCR2/GOT2/CLN3/GMPS/PYCR1/OAT/GGT1/PYCR3	8
BP	GO:0009123	nucleoside monophosphate metabolic process	8/813	78/18800	0.0192738	0.188617	0.171343	ATIC/TK1/UMPS/IMPDH1/GMPS/APRT/ADA/PAICS	8
BP	GO:0008033	tRNA processing	11/813	125/18800	0.0196817	0.192181	0.17458	POLR3K/CDK5RAP1/MOCS3/LSM6/METTL2A/NSUN2/RPP21/NAT10/RPP40/RPP25/POP1	11
BP	GO:0006401	RNA catabolic process	20/813	280/18800	0.0197297	0.192222	0.174618	RNPS1/PARN/GSPT1/FASTKD2/EDC3/CNOT11/FXR1/LSM6/LSM2/NSUN2/CARHSP1/DKC1/FEN1/SMG8/E2F1/PNPT1/PABPC1/RNASEH2A/POP1/IKBKE	20
BP	GO:0009116	nucleoside metabolic process	7/813	64/18800	0.02018	0.194237	0.176448	ATIC/TK1/UMPS/NUDT1/APRT/ADA/NME4	7
BP	GO:0043457	regulation of cellular respiration	6/813	50/18800	0.0202119	0.194237	0.176448	TRAP1/SHMT2/PNPT1/PPIF/ABCD1/NUPR1	6
BP	GO:0000054	ribosomal subunit export from nucleus	3/813	14/18800	0.0205211	0.194237	0.176448	EIF6/LTV1/LSG1	3
BP	GO:0002903	negative regulation of B cell apoptotic process	3/813	14/18800	0.0205211	0.194237	0.176448	AURKB/ADA/MIF	3
BP	GO:0003376	sphingosine-1-phosphate receptor signaling pathway	3/813	14/18800	0.0205211	0.194237	0.176448	EZR/SPHK2/S1PR5	3
BP	GO:0006241	CTP biosynthetic process	3/813	14/18800	0.0205211	0.194237	0.176448	NME1/NME3/NME4	3
BP	GO:0006287	base-excision repair, gap-filling	3/813	14/18800	0.0205211	0.194237	0.176448	POLG/LIG1/FEN1	3
BP	GO:0010457	centriole-centriole cohesion	3/813	14/18800	0.0205211	0.194237	0.176448	DCTN1/NEK2/SGO1	3
BP	GO:0033750	ribosome localization	3/813	14/18800	0.0205211	0.194237	0.176448	EIF6/LTV1/LSG1	3
BP	GO:0098760	response to interleukin-7	3/813	14/18800	0.0205211	0.194237	0.176448	ATIC/HDGF/P4HB	3
BP	GO:0098761	cellular response to interleukin-7	3/813	14/18800	0.0205211	0.194237	0.176448	ATIC/HDGF/P4HB	3
BP	GO:2000105	positive regulation of DNA-templated DNA replication	3/813	14/18800	0.0205211	0.194237	0.176448	DBF4B/CDT1/E2F8	3
BP	GO:0048145	regulation of fibroblast proliferation	8/813	79/18800	0.0206619	0.194237	0.176448	BAX/CDC6/E2F1/CDK4/CCNA2/CCNB1/MIF/NUPR1	8
BP	GO:0000154	rRNA modification	5/813	37/18800	0.0206879	0.194237	0.176448	TSR3/RPUSD1/RPUSD2/DKC1/NAT10	5
BP	GO:0000731	DNA synthesis involved in DNA repair	5/813	37/18800	0.0206879	0.194237	0.176448	HROB/WRNIP1/DTL/PCLAF/RFC3	5
BP	GO:1904358	positive regulation of telomere maintenance via telomere lengthening	5/813	37/18800	0.0206879	0.194237	0.176448	PARN/DKC1/NEK2/AURKB/CCT5	5
BP	GO:2000758	positive regulation of peptidyl-lysine acetylation	5/813	37/18800	0.0206879	0.194237	0.176448	BRD7/GLYR1/SMARCB1/SPHK2/SOX4	5
BP	GO:0009147	pyrimidine nucleoside triphosphate metabolic process	4/813	25/18800	0.0212869	0.198587	0.1804	DCTPP1/NME1/NME3/NME4	4
BP	GO:0031579	membrane raft organization	4/813	25/18800	0.0212869	0.198587	0.1804	CLN3/PACSIN2/S100A10/MYADM	4
BP	GO:0046033	AMP metabolic process	4/813	25/18800	0.0212869	0.198587	0.1804	ATIC/APRT/ADA/PAICS	4
BP	GO:0072594	establishment of protein localization to organelle	28/813	431/18800	0.0215074	0.200219	0.181882	TSC2/NAGPA/SGF29/CHMP4B/TOMM22/NUP93/DNAJC19/VPS37B/SUMO1/MAIP1/HEATR3/JUP/BAX/NUP107/CSE1L/ZFAND2B/DKC1/TIMM17A/RANBP2/HSPD1/CCT5/HSP90AA1/KPNA2/TSPO/IPO5/BRCA2/ECT2/CDK1	28
BP	GO:0006120	mitochondrial electron transport, NADH to ubiquinone	6/813	51/18800	0.0220966	0.204617	0.185877	NDUFB10/NDUFAB1/NDUFB3/NDUFS1/NDUFS6/NDUFB9	6
BP	GO:0010823	negative regulation of mitochondrion organization	6/813	51/18800	0.0220966	0.204617	0.185877	TSC2/OPA1/TMEM14A/PPIF/TSPO/MPV17L	6
BP	GO:0032204	regulation of telomere maintenance	8/813	80/18800	0.0221195	0.204617	0.185877	USP7/PARN/SLX4/DKC1/NEK2/AURKB/CCT5/NAT10	8
BP	GO:0000462	maturation of SSU-rRNA from tricistronic rRNA transcript (SSU-rRNA, 5.8S rRNA, LSU-rRNA)	5/813	38/18800	0.0230004	0.212319	0.192874	TBL3/MRPS11/KRI1/SLX9/RPP40	5
BP	GO:0009063	cellular amino acid catabolic process	10/813	112/18800	0.0232695	0.213904	0.194314	GOT2/BCKDK/SHMT2/ETFA/BLMH/OAT/HYKK/IVD/MCCC1/HAAO	10
BP	GO:0009185	ribonucleoside diphosphate metabolic process	10/813	112/18800	0.0232695	0.213904	0.194314	JMJD8/EIF6/ALDOA/UMPS/DDIT4/PKM/FOXK1/PFKFB2/RRM2/NUPR1	10
BP	GO:0006096	glycolytic process	8/813	81/18800	0.0236482	0.216029	0.196245	JMJD8/EIF6/ALDOA/DDIT4/PKM/FOXK1/PFKFB2/NUPR1	8
BP	GO:0006354	DNA-templated transcription, elongation	8/813	81/18800	0.0236482	0.216029	0.196245	AXIN1/ELOB/NELFE/SUPT4H1/HTATSF1/ADRM1/ALYREF/RNF168	8
BP	GO:0048144	fibroblast proliferation	8/813	81/18800	0.0236482	0.216029	0.196245	BAX/CDC6/E2F1/CDK4/CCNA2/CCNB1/MIF/NUPR1	8
BP	GO:0002204	somatic recombination of immunoglobulin genes involved in immune response	6/813	52/18800	0.0240962	0.216602	0.196764	EXO1/HSPD1/RNF168/PARP3/ATAD5/UNG	6
BP	GO:0002208	somatic diversification of immunoglobulins involved in immune response	6/813	52/18800	0.0240962	0.216602	0.196764	EXO1/HSPD1/RNF168/PARP3/ATAD5/UNG	6
BP	GO:0032206	positive regulation of telomere maintenance	6/813	52/18800	0.0240962	0.216602	0.196764	PARN/SLX4/DKC1/NEK2/AURKB/CCT5	6
BP	GO:0045190	isotype switching	6/813	52/18800	0.0240962	0.216602	0.196764	EXO1/HSPD1/RNF168/PARP3/ATAD5/UNG	6
BP	GO:0001783	B cell apoptotic process	4/813	26/18800	0.0243194	0.216602	0.196764	BAX/AURKB/ADA/MIF	4
BP	GO:0051204	protein insertion into mitochondrial membrane	4/813	26/18800	0.0243194	0.216602	0.196764	TOMM22/MAIP1/BAX/HSP90AA1	4
BP	GO:0070199	establishment of protein localization to chromosome	4/813	26/18800	0.0243194	0.216602	0.196764	SGF29/DKC1/CCT5/BRCA2	4
BP	GO:0000212	meiotic spindle organization	3/813	15/18800	0.0248431	0.216602	0.196764	AURKA/CCNB2/TUBG1	3
BP	GO:0000478	endonucleolytic cleavage involved in rRNA processing	3/813	15/18800	0.0248431	0.216602	0.196764	TBL3/KRI1/RPP40	3
BP	GO:0000479	endonucleolytic cleavage of tricistronic rRNA transcript (SSU-rRNA, 5.8S rRNA, LSU-rRNA)	3/813	15/18800	0.0248431	0.216602	0.196764	TBL3/KRI1/RPP40	3
BP	GO:0001325	formation of extrachromosomal circular DNA	3/813	15/18800	0.0248431	0.216602	0.196764	SLX4/BLM/EXO1	3
BP	GO:0006098	pentose-phosphate shunt	3/813	15/18800	0.0248431	0.216602	0.196764	RPIA/RPE/TALDO1	3
BP	GO:0009209	pyrimidine ribonucleoside triphosphate biosynthetic process	3/813	15/18800	0.0248431	0.216602	0.196764	NME1/NME3/NME4	3
BP	GO:0016446	somatic hypermutation of immunoglobulin genes	3/813	15/18800	0.0248431	0.216602	0.196764	EXO1/POLQ/UNG	3
BP	GO:0033008	positive regulation of mast cell activation involved in immune response	3/813	15/18800	0.0248431	0.216602	0.196764	SPHK2/VAMP8/ADORA2B	3
BP	GO:0043306	positive regulation of mast cell degranulation	3/813	15/18800	0.0248431	0.216602	0.196764	SPHK2/VAMP8/ADORA2B	3
BP	GO:0051290	protein heterotetramerization	3/813	15/18800	0.0248431	0.216602	0.196764	PKD1/HSD17B8/RRM2	3
BP	GO:0051315	attachment of mitotic spindle microtubules to kinetochore	3/813	15/18800	0.0248431	0.216602	0.196764	AURKB/CDT1/NUF2	3
BP	GO:0060707	trophoblast giant cell differentiation	3/813	15/18800	0.0248431	0.216602	0.196764	PLK4/E2F8/SNAI1	3
BP	GO:0090656	t-circle formation	3/813	15/18800	0.0248431	0.216602	0.196764	SLX4/BLM/EXO1	3
BP	GO:0090737	telomere maintenance via telomere trimming	3/813	15/18800	0.0248431	0.216602	0.196764	SLX4/BLM/EXO1	3
BP	GO:1901836	regulation of transcription of nucleolar large rRNA by RNA polymerase I	3/813	15/18800	0.0248431	0.216602	0.196764	PWP1/NCL/SMARCB1	3
BP	GO:0051170	import into nucleus	13/813	163/18800	0.0248446	0.216602	0.196764	TSC2/NUP93/SUMO1/HEATR3/JUP/NUP107/CSE1L/HTATIP2/RANBP2/KPNA2/IPO5/ECT2/CDK1	13
BP	GO:0006757	ATP generation from ADP	8/813	82/18800	0.0252495	0.218398	0.198397	JMJD8/EIF6/ALDOA/DDIT4/PKM/FOXK1/PFKFB2/NUPR1	8
BP	GO:0008589	regulation of smoothened signaling pathway	8/813	82/18800	0.0252495	0.218398	0.198397	TEDC2/MGRN1/CREBBP/MKS1/IFT140/TUBD1/TEDC1/GLIS2	8
BP	GO:0072527	pyrimidine-containing compound metabolic process	8/813	82/18800	0.0252495	0.218398	0.198397	NTHL1/DCTPP1/TK1/UMPS/NME1/NME3/NME4/UNG	8
BP	GO:1901292	nucleoside phosphate catabolic process	8/813	82/18800	0.0252495	0.218398	0.198397	NTHL1/DCTPP1/CNP/PDE8A/PDE4A/ADA/ABCD1/UNG	8
BP	GO:1904377	positive regulation of protein localization to cell periphery	7/813	67/18800	0.0253092	0.218484	0.198475	PDPK1/CIB1/PPP1R9B/EZR/CLN3/ACSL3/WNT3A	7
BP	GO:0032210	regulation of telomere maintenance via telomerase	6/813	53/18800	0.0262133	0.225404	0.20476	PARN/DKC1/NEK2/AURKB/CCT5/NAT10	6
BP	GO:0072698	protein localization to microtubule cytoskeleton	6/813	53/18800	0.0262133	0.225404	0.20476	MAPRE1/AURKA/SPAG5/GAS2L1/TTK/FAM83D	6
BP	GO:0010821	regulation of mitochondrion organization	12/813	148/18800	0.0271206	0.23275	0.211434	TSC2/RHOT2/ZNF205/VPS35/BAX/OPA1/TMEM14A/AURKA/CHCHD10/PPIF/TSPO/MPV17L	12
BP	GO:2000756	regulation of peptidyl-lysine acetylation	7/813	68/18800	0.0272002	0.232978	0.211641	BRD7/GLYR1/SMARCB1/SPHK2/SOX4/HDAC2/CHEK1	7
BP	GO:0051291	protein heterooligomerization	4/813	27/18800	0.0275997	0.23594	0.214331	MAT2A/PKD1/HSD17B8/RRM2	4
BP	GO:0000184	nuclear-transcribed mRNA catabolic process, nonsense-mediated decay	5/813	40/18800	0.0281108	0.237994	0.216197	RNPS1/PARN/GSPT1/SMG8/PABPC1	5
BP	GO:0000266	mitochondrial fission	5/813	40/18800	0.0281108	0.237994	0.216197	VPS35/MTFR2/OPA1/AURKA/MTFP1	5
BP	GO:0006730	one-carbon metabolic process	5/813	40/18800	0.0281108	0.237994	0.216197	MAT2A/AHCY/SHMT2/CA7/MTHFD2	5
BP	GO:0007007	inner mitochondrial membrane organization	5/813	40/18800	0.0281108	0.237994	0.216197	MTX1/MAIP1/IMMT/OPA1/CHCHD10	5
BP	GO:0045740	positive regulation of DNA replication	5/813	40/18800	0.0281108	0.237994	0.216197	DBF4B/CDT1/ATAD5/E2F8/CDK1	5
BP	GO:0009451	RNA modification	13/813	166/18800	0.0283004	0.239139	0.217237	TSR3/RPUSD1/PARN/DNAJB11/RPUSD2/CDK5RAP1/MOCS3/RAMAC/METTL2A/NSUN2/DKC1/NAT10/HENMT1	13
BP	GO:1900182	positive regulation of protein localization to nucleus	8/813	84/18800	0.0286761	0.241848	0.219699	PLK1/JUP/DKC1/CCT5/GLIS2/IPO5/ECT2/CDK1	8
BP	GO:0016573	histone acetylation	13/813	167/18800	0.0295268	0.247862	0.225162	NAA60/ACTB/BRD7/SGF29/CREBBP/GLYR1/SRCAP/ACTL6A/SMARCB1/SPHK2/YEATS4/CHEK1/BRCA2	13
BP	GO:0002566	somatic diversification of immune receptors via somatic mutation	3/813	16/18800	0.0296149	0.247862	0.225162	EXO1/POLQ/UNG	3
BP	GO:0046036	CTP metabolic process	3/813	16/18800	0.0296149	0.247862	0.225162	NME1/NME3/NME4	3
BP	GO:0090520	sphingolipid mediated signaling pathway	3/813	16/18800	0.0296149	0.247862	0.225162	EZR/SPHK2/S1PR5	3
BP	GO:0046395	carboxylic acid catabolic process	17/813	238/18800	0.0299037	0.249804	0.226926	AMDHD2/ECI1/GOT2/DECR2/BCKDK/SHMT2/ETFA/BLMH/OAT/HYKK/XYLB/ABCD1/EHHADH/IVD/MTLN/MCCC1/HAAO	17
BP	GO:0009142	nucleoside triphosphate biosynthetic process	8/813	85/18800	0.0305043	0.254337	0.231044	ATP6V0C/ALDOA/SPHK2/IMPDH1/NME1/ANTKMT/NME3/NME4	8
BP	GO:0006458	'de novo' protein folding	5/813	41/18800	0.0309148	0.257272	0.23371	SDF2/HSPE1/SDF2L1/HSPD1/HSPH1	5
BP	GO:0016556	mRNA modification	4/813	28/18800	0.031131	0.258582	0.2349	DNAJB11/RPUSD2/NSUN2/DKC1	4
BP	GO:1900542	regulation of purine nucleotide metabolic process	8/813	86/18800	0.0324108	0.268704	0.244095	JMJD8/EIF6/SPHK2/DDIT4/ANTKMT/NUPR1/PDZD3/ADORA2B	8
BP	GO:0046148	pigment biosynthetic process	6/813	56/18800	0.0332929	0.275497	0.250266	TMEM14A/NFE2L1/FLVCR1/TSPO/DDT/PMEL	6
BP	GO:0051881	regulation of mitochondrial membrane potential	7/813	71/18800	0.0334427	0.276216	0.250919	CLIC1/BAX/NDUFS1/PYCR1/TSPO/ABCD1/MTLN	7
BP	GO:0032467	positive regulation of cytokinesis	5/813	42/18800	0.0338881	0.27937	0.253784	CDC6/AURKB/KIF23/RACGAP1/ECT2	5
BP	GO:0031331	positive regulation of cellular catabolic process	28/813	449/18800	0.0339958	0.279733	0.254114	NPRL3/AXIN1/TSC2/ELOB/PARN/STUB1/VPS35/PLK1/SUMO1/BAX/RNF40/EZR/HMGB1/PACSIN3/KEAP1/AURKA/MAGEF1/PNPT1/CDC20/HSPBP1/HSP90AA1/GBA/PABPC1/ABCD1/TRIM65/RNF144B/NUPR1/MTLN	28
BP	GO:0046394	carboxylic acid biosynthetic process	21/813	316/18800	0.0343734	0.282311	0.256456	NDUFAB1/PYCR2/EIF6/GOT2/SEPHS2/DECR2/CLN3/SHMT2/PYCR1/OAT/GGT1/DEGS1/ABCD1/HSD17B8/PYCR3/PRXL2B/MIF/FGFR4/PECR/HAAO/CYP27A1	21
BP	GO:0051099	positive regulation of binding	13/813	171/18800	0.0348203	0.282915	0.257005	MAPRE1/PKD1/CALM2/HMGB1/NME1/HFE/EIF3C/GMNN/HMGB2/CDT1/H1-0/S100A10/WNT3A	13
BP	GO:0006474	N-terminal protein amino acid acetylation	3/813	17/18800	0.0348332	0.282915	0.257005	NAA60/CREBBP/SOX4	3
BP	GO:0009226	nucleotide-sugar biosynthetic process	3/813	17/18800	0.0348332	0.282915	0.257005	AMDHD2/PMM2/UAP1L1	3
BP	GO:0031573	mitotic intra-S DNA damage checkpoint signaling	3/813	17/18800	0.0348332	0.282915	0.257005	EME1/EME2/MDC1	3
BP	GO:0070200	establishment of protein localization to telomere	3/813	17/18800	0.0348332	0.282915	0.257005	DKC1/CCT5/BRCA2	3
BP	GO:0090136	epithelial cell-cell adhesion	3/813	17/18800	0.0348332	0.282915	0.257005	JUP/VCL/DSP	3
BP	GO:0009264	deoxyribonucleotide catabolic process	4/813	29/18800	0.0349157	0.283062	0.257138	NTHL1/DCTPP1/ADA/UNG	4
BP	GO:0018023	peptidyl-lysine trimethylation	6/813	57/18800	0.0359023	0.28999	0.263432	EEF2KMT/SETD1A/PWP1/SMYD5/SMARCB1/ANTKMT	6
BP	GO:0032784	regulation of DNA-templated transcription, elongation	6/813	57/18800	0.0359023	0.28999	0.263432	AXIN1/NELFE/SUPT4H1/HTATSF1/ALYREF/RNF168	6
BP	GO:0016053	organic acid biosynthetic process	21/813	318/18800	0.0364092	0.293448	0.266573	NDUFAB1/PYCR2/EIF6/GOT2/SEPHS2/DECR2/CLN3/SHMT2/PYCR1/OAT/GGT1/DEGS1/ABCD1/HSD17B8/PYCR3/PRXL2B/MIF/FGFR4/PECR/HAAO/CYP27A1	21
BP	GO:0006140	regulation of nucleotide metabolic process	8/813	88/18800	0.036464	0.293448	0.266573	JMJD8/EIF6/SPHK2/DDIT4/ANTKMT/NUPR1/PDZD3/ADORA2B	8
BP	GO:0006979	response to oxidative stress	27/813	433/18800	0.0368637	0.296113	0.268994	GFER/TBC1D24/TRAP1/HMOX2/ANKZF1/PYCR2/PDCD10/ZNF622/PDE8A/PRDX1/VRK2/KEAP1/PNPT1/P4HB/NFE2L1/NUDT1/CAPN2/PYCR1/PDLIM1/PPIF/PRDX5/ABCD1/HDAC2/TRPM2/RNF112/ECT2/CDK1	27
BP	GO:0071902	positive regulation of protein serine/threonine kinase activity	15/813	208/18800	0.0369299	0.296113	0.268994	TELO2/AXIN1/MLST8/CIB1/CKS1B/PKD1/PDCD10/CDC6/CALM2/DBF4B/CCNYL1/IQGAP1/CCNB1/INCENP/MIF	15
BP	GO:0009394	2'-deoxyribonucleotide metabolic process	5/813	43/18800	0.0370328	0.296397	0.269252	NTHL1/DCTPP1/ADA/UNG/RRM2	5
BP	GO:0018393	internal peptidyl-lysine acetylation	13/813	173/18800	0.0377077	0.30125	0.273661	NAA60/ACTB/BRD7/SGF29/CREBBP/GLYR1/SRCAP/ACTL6A/SMARCB1/SPHK2/YEATS4/CHEK1/BRCA2	13
BP	GO:0051701	biological process involved in interaction with host	14/813	191/18800	0.0381432	0.304177	0.276319	THOC6/CHMP4B/PHB1/F11R/VPS37B/TRIM26/FUCA2/VAMP8/SIVA1/ALYREF/P4HB/THOC3/NECTIN1/CDK1	14
BP	GO:0045860	positive regulation of protein kinase activity	25/813	396/18800	0.0383337	0.305141	0.277195	PDPK1/TELO2/AXIN1/MLST8/CIB1/PHB1/CKS1B/PKD1/PDCD10/MAP2K3/CDC6/CALM2/TPX2/DBF4B/CCNYL1/IQGAP1/HSP90AA1/TRAF4/CCNB1/GPRC5B/INCENP/MIF/WNT3A/PRKCZ/ECT2	25
BP	GO:0010257	NADH dehydrogenase complex assembly	6/813	58/18800	0.0386395	0.305658	0.277665	NDUFB10/TMEM186/NDUFAB1/NDUFB3/NDUFS1/NDUFB9	6
BP	GO:0032981	mitochondrial respiratory chain complex I assembly	6/813	58/18800	0.0386395	0.305658	0.277665	NDUFB10/TMEM186/NDUFAB1/NDUFB3/NDUFS1/NDUFB9	6
BP	GO:0042733	embryonic digit morphogenesis	6/813	58/18800	0.0386395	0.305658	0.277665	CREBBP/MKS1/BAX/IFT140/FLVCR1/HDAC2	6
BP	GO:0009218	pyrimidine ribonucleotide metabolic process	4/813	30/18800	0.0389551	0.305658	0.277665	UMPS/NME1/NME3/NME4	4
BP	GO:0046386	deoxyribose phosphate catabolic process	4/813	30/18800	0.0389551	0.305658	0.277665	NTHL1/DCTPP1/ADA/UNG	4
BP	GO:0090151	establishment of protein localization to mitochondrial membrane	4/813	30/18800	0.0389551	0.305658	0.277665	TOMM22/MAIP1/BAX/HSP90AA1	4
BP	GO:1902230	negative regulation of intrinsic apoptotic signaling pathway in response to DNA damage	4/813	30/18800	0.0389551	0.305658	0.277665	ATAD5/MIF/DDIAS/SNAI1	4
BP	GO:1903579	negative regulation of ATP metabolic process	4/813	30/18800	0.0389551	0.305658	0.277665	DDIT4/PPIF/TSPO/NUPR1	4
BP	GO:0007595	lactation	5/813	44/18800	0.0403507	0.312762	0.284118	MTX1/UMPS/NME1/APRT/SLC29A2	5
BP	GO:0009262	deoxyribonucleotide metabolic process	5/813	44/18800	0.0403507	0.312762	0.284118	NTHL1/DCTPP1/ADA/UNG/RRM2	5
BP	GO:0006740	NADPH regeneration	3/813	18/18800	0.0404923	0.312762	0.284118	RPIA/RPE/TALDO1	3
BP	GO:0009208	pyrimidine ribonucleoside triphosphate metabolic process	3/813	18/18800	0.0404923	0.312762	0.284118	NME1/NME3/NME4	3
BP	GO:0042790	nucleolar large rRNA transcription by RNA polymerase I	3/813	18/18800	0.0404923	0.312762	0.284118	PWP1/NCL/SMARCB1	3
BP	GO:0045653	negative regulation of megakaryocyte differentiation	3/813	18/18800	0.0404923	0.312762	0.284118	CIB1/H4C9/H4C14	3
BP	GO:0046040	IMP metabolic process	3/813	18/18800	0.0404923	0.312762	0.284118	ATIC/APRT/PAICS	3
BP	GO:1904872	regulation of telomerase RNA localization to Cajal body	3/813	18/18800	0.0404923	0.312762	0.284118	PARN/DKC1/CCT5	3
BP	GO:0033674	positive regulation of kinase activity	29/813	476/18800	0.0405321	0.312762	0.284118	PDPK1/TELO2/AXIN1/MLST8/CIB1/PHB1/CKS1B/PKD1/PDCD10/MAP2K3/CDC6/ZNF622/CALM2/TPX2/DBF4B/CCNYL1/RANBP2/IQGAP1/HSP90AA1/TRAF4/PFKFB2/CCNB1/GPRC5B/INCENP/MIF/FGFR4/WNT3A/PRKCZ/ECT2	29
BP	GO:0051298	centrosome duplication	7/813	74/18800	0.0405722	0.312762	0.284118	CCNF/CHMP4B/NDE1/PLK4/NAT10/SAC3D1/BRCA2	7
BP	GO:0006475	internal protein amino acid acetylation	13/813	175/18800	0.0407614	0.31367	0.284943	NAA60/ACTB/BRD7/SGF29/CREBBP/GLYR1/SRCAP/ACTL6A/SMARCB1/SPHK2/YEATS4/CHEK1/BRCA2	13
BP	GO:0046031	ADP metabolic process	8/813	90/18800	0.0408452	0.313765	0.285029	JMJD8/EIF6/ALDOA/DDIT4/PKM/FOXK1/PFKFB2/NUPR1	8
BP	GO:0002886	regulation of myeloid leukocyte mediated immunity	6/813	59/18800	0.0415059	0.318284	0.289134	PDPK1/DNASE1/SPHK2/VAMP8/FES/ADORA2B	6
BP	GO:0007292	female gamete generation	12/813	158/18800	0.0417359	0.31949	0.29023	PARN/HROB/PLK1/ZNF830/NCAPH/AURKA/CCNB2/TRIP13/NCAPH2/TTK/YBX2/BRCA2	12
BP	GO:0031334	positive regulation of protein-containing complex assembly	14/813	194/18800	0.0425741	0.325213	0.295428	MLST8/MAPRE1/STUB1/SUMO1/DCTN1/BAX/PFN1/HSP90AA1/CDT1/BIN1/FES/MTLN/ABCA3/CDC42EP1	14
BP	GO:0018210	peptidyl-threonine modification	10/813	124/18800	0.0426314	0.325213	0.295428	PDPK1/AXIN1/PLK1/CALM2/DDIT4/HASPIN/TTK/CHEK1/GALNT3/CDK1	10
BP	GO:0006783	heme biosynthetic process	4/813	31/18800	0.0432498	0.328221	0.298161	TMEM14A/NFE2L1/FLVCR1/TSPO	4
BP	GO:0035066	positive regulation of histone acetylation	4/813	31/18800	0.0432498	0.328221	0.298161	BRD7/GLYR1/SMARCB1/SPHK2	4
BP	GO:0070528	protein kinase C signaling	4/813	31/18800	0.0432498	0.328221	0.298161	SPHK2/ADGRG1/MYADM/PRKCZ	4
BP	GO:0006606	protein import into nucleus	12/813	159/18800	0.0434502	0.329173	0.299026	TSC2/NUP93/SUMO1/HEATR3/JUP/NUP107/CSE1L/RANBP2/KPNA2/IPO5/ECT2/CDK1	12
BP	GO:0019692	deoxyribose phosphate metabolic process	5/813	45/18800	0.0438432	0.331008	0.300693	NTHL1/DCTPP1/ADA/UNG/RRM2	5
BP	GO:0033003	regulation of mast cell activation	5/813	45/18800	0.0438432	0.331008	0.300693	PDPK1/SPHK2/VAMP8/FES/ADORA2B	5
BP	GO:0016447	somatic recombination of immunoglobulin gene segments	6/813	60/18800	0.0445029	0.335413	0.304694	EXO1/HSPD1/RNF168/PARP3/ATAD5/UNG	6
BP	GO:0006403	RNA localization	14/813	196/18800	0.0457228	0.344017	0.31251	THOC6/PARN/NOP58/RAE1/NUP93/NUP107/NSUN2/DKC1/ALYREF/RANBP2/PNPT1/CCT5/THOC3/TST	14
BP	GO:0006635	fatty acid beta-oxidation	7/813	76/18800	0.0458359	0.344018	0.312512	ECI1/DECR2/ETFA/ABCD1/EHHADH/IVD/MTLN	7
BP	GO:0000729	DNA double-strand break processing	3/813	19/18800	0.0465842	0.344018	0.312512	SLX4/BLM/BRIP1	3
BP	GO:0006337	nucleosome disassembly	3/813	19/18800	0.0465842	0.344018	0.312512	SMARCD2/SMARCB1/HMGA1	3
BP	GO:0009148	pyrimidine nucleoside triphosphate biosynthetic process	3/813	19/18800	0.0465842	0.344018	0.312512	NME1/NME3/NME4	3
BP	GO:0009223	pyrimidine deoxyribonucleotide catabolic process	3/813	19/18800	0.0465842	0.344018	0.312512	NTHL1/DCTPP1/UNG	3
BP	GO:0090670	RNA localization to Cajal body	3/813	19/18800	0.0465842	0.344018	0.312512	PARN/DKC1/CCT5	3
BP	GO:0090671	telomerase RNA localization to Cajal body	3/813	19/18800	0.0465842	0.344018	0.312512	PARN/DKC1/CCT5	3
BP	GO:0090672	telomerase RNA localization	3/813	19/18800	0.0465842	0.344018	0.312512	PARN/DKC1/CCT5	3
BP	GO:0090685	RNA localization to nucleus	3/813	19/18800	0.0465842	0.344018	0.312512	PARN/DKC1/CCT5	3
BP	GO:1903427	negative regulation of reactive oxygen species biosynthetic process	3/813	19/18800	0.0465842	0.344018	0.312512	TRAP1/ABCD1/MPV17L	3
BP	GO:1905146	lysosomal protein catabolic process	3/813	19/18800	0.0465842	0.344018	0.312512	VPS35/CLN3/GBA	3
BP	GO:0042168	heme metabolic process	5/813	46/18800	0.0475112	0.350054	0.317994	HMOX2/TMEM14A/NFE2L1/FLVCR1/TSPO	5
BP	GO:0006221	pyrimidine nucleotide biosynthetic process	4/813	32/18800	0.0477998	0.350054	0.317994	UMPS/NME1/NME3/NME4	4
BP	GO:0006335	DNA replication-dependent chromatin assembly	4/813	32/18800	0.0477998	0.350054	0.317994	H4C9/H4C14/ASF1B/H3C6	4
BP	GO:0034723	DNA replication-dependent chromatin organization	4/813	32/18800	0.0477998	0.350054	0.317994	H4C9/H4C14/ASF1B/H3C6	4
BP	GO:0051085	chaperone cofactor-dependent protein refolding	4/813	32/18800	0.0477998	0.350054	0.317994	SDF2/HSPE1/SDF2L1/HSPH1	4
BP	GO:0032273	positive regulation of protein polymerization	8/813	93/18800	0.0480501	0.351301	0.319127	MLST8/MAPRE1/DCTN1/PFN1/HSP90AA1/BIN1/FES/CDC42EP1	8
BP	GO:0034968	histone lysine methylation	10/813	127/18800	0.0488061	0.356236	0.32361	SETD1A/PWP1/SMYD5/NELFE/SMARCB1/DPY30/SMYD2/DNMT3B/JARID2/PAGR1	10
CC	GO:0098687	chromosomal region	69/848	366/19594	1.52551e-25	8.54285e-23	6.68012e-23	THOC6/TELO2/CHMP4B/SLX4/PLK1/OIP5/KIF22/DCTN1/KNSTRN/NUP107/NDE1/RANGAP1/DSN1/SKA3/BLM/NSL1/DPY30/ZWILCH/RAD51/FEN1/CENPX/WRNIP1/ERCC6L/ALYREF/NEK2/AURKB/SPC25/HJURP/BIRC5/H4C9/CBX1/SPAG5/BUB1B/SGO1/NAT10/CDT1/KIF18A/BUB1/CDCA5/THOC3/CENPM/CENPO/SGO2/CCNB1/MCM5/H4C14/MTBP/MCM3/PPP2R5A/SPC24/KNTC1/MAD2L1/HDAC2/DSCC1/INCENP/TTK/CENPF/NCAPG/ESCO2/CENPW/SMC4/ZWINT/CHEK1/CENPU/KNL1/NUF2/BRCA2/SNAI1/CD…	69
CC	GO:0000775	chromosome, centromeric region	52/848	227/19594	1.46544e-23	4.10322e-21	3.20853e-21	CHMP4B/PLK1/OIP5/KIF22/DCTN1/KNSTRN/NUP107/NDE1/RANGAP1/DSN1/SKA3/NSL1/ZWILCH/CENPX/ERCC6L/NEK2/AURKB/SPC25/HJURP/BIRC5/H4C9/CBX1/SPAG5/BUB1B/SGO1/CDT1/KIF18A/BUB1/CDCA5/CENPM/CENPO/SGO2/CCNB1/H4C14/MTBP/PPP2R5A/SPC24/KNTC1/MAD2L1/DSCC1/INCENP/TTK/CENPF/NCAPG/ESCO2/CENPW/SMC4/ZWINT/CENPU/KNL1/NUF2/SNAI1	52
CC	GO:0000776	kinetochore	41/848	146/19594	2.05342e-22	3.83304e-20	2.99727e-20	CHMP4B/PLK1/KIF22/DCTN1/KNSTRN/NUP107/NDE1/RANGAP1/DSN1/SKA3/NSL1/ZWILCH/CENPX/ERCC6L/NEK2/AURKB/SPC25/HJURP/BIRC5/SPAG5/BUB1B/SGO1/CDT1/KIF18A/BUB1/CENPM/CENPO/SGO2/CCNB1/MTBP/SPC24/KNTC1/MAD2L1/INCENP/TTK/CENPF/CENPW/ZWINT/CENPU/KNL1/NUF2	41
CC	GO:0000779	condensed chromosome, centromeric region	42/848	156/19594	3.77368e-22	5.28315e-20	4.13118e-20	CHMP4B/PLK1/KIF22/DCTN1/KNSTRN/NUP107/NDE1/RANGAP1/DSN1/SKA3/NSL1/ZWILCH/CENPX/ERCC6L/NEK2/AURKB/SPC25/HJURP/BIRC5/SPAG5/BUB1B/SGO1/CDT1/KIF18A/BUB1/CENPM/CENPO/SGO2/CCNB1/MTBP/SPC24/KNTC1/MAD2L1/INCENP/TTK/CENPF/NCAPG/CENPW/ZWINT/CENPU/KNL1/NUF2	42
CC	GO:0000793	condensed chromosome	52/848	255/19594	4.1663e-21	4.66625e-19	3.6488e-19	UBE2I/CHMP4B/PLK1/KIF22/DCTN1/KNSTRN/NUP107/NDE1/NIFK/RANGAP1/DSN1/SKA3/BLM/NSL1/ZWILCH/HMGB1/RAD51/CENPX/ERCC6L/NEK2/AURKB/SPC25/HJURP/BIRC5/SPAG5/BUB1B/SGO1/HMGB2/TUBG1/CDT1/KIF18A/BUB1/CENPM/CENPO/SGO2/CCNB1/MTBP/SPC24/KNTC1/MAD2L1/INCENP/TTK/CENPF/NCAPG/CENPW/ZWINT/CHEK1/CENPU/KNL1/P3H4/NUF2/BRCA2	52
CC	GO:0005759	mitochondrial matrix	64/848	473/19594	4.29944e-16	4.01281e-14	3.13784e-14	FAHD1/MRPS34/TRAP1/MRPL28/DNAJA3/MPG/HAGH/EARS2/IDH2/NDUFAB1/LRRC59/MRPL46/ECI1/MRPS18B/MRPS5/MRPS11/FASTKD2/MRPL27/DNAJC19/IARS2/MRPL10/HSPE1/ERAL1/MAIP1/PYCR2/MRPS7/MRPL47/GOT2/ISCA2/COASY/BCKDK/MRPS18A/MRPL13/MRPL36/TUFM/POLG/NDUFS1/RAD51/SHMT2/ETFA/MRPL11/MRPS9/HSPD1/PNPT1/NUDT1/PYCR1/OAT/HYKK/PPIF/BDH1/PRDX5/CCNB1/NME4/ALDH1B1/HSD17B8/MTHFD2/MRPS24/CHPF/IVD/TST/MCCC1/MRPL12/CDK1/CYP27A1	64
CC	GO:0005819	spindle	57/848	402/19594	2.32865e-15	1.86292e-13	1.45672e-13	E4F1/NUBP2/MAPRE1/SHCBP1/CHMP4B/RAE1/PLK1/KIF22/DCTN1/POC1A/KNSTRN/NGRN/NDE1/PLK4/RANGAP1/CDC6/SKA3/CALM2/EML4/TPX2/NSUN2/PRC1/KIFC1/HAUS8/TTLL12/NEK2/AURKB/AURKA/BIRC5/CBX1/SPAG5/BUB1B/CDC20/SGO1/TUBG1/HASPIN/CKAP2L/KIF18A/KIF18B/KIF23/TMEM9/RACGAP1/CCNB1/TACC3/KNTC1/MAD2L1/PYCR3/INCENP/TTK/CENPF/KIF11/SAC3D1/DCUN1D5/FAM83D/ECT2/CDK1/HMMR	57
CC	GO:0072686	mitotic spindle	32/848	160/19594	3.05762e-13	2.14033e-11	1.67365e-11	MAPRE1/RAE1/PLK1/KIF22/DCTN1/KNSTRN/NGRN/RANGAP1/CDC6/SKA3/EML4/TPX2/PRC1/KIFC1/HAUS8/AURKB/AURKA/SPAG5/TUBG1/CKAP2L/KIF18A/KIF18B/KIF23/TMEM9/RACGAP1/TACC3/MAD2L1/PYCR3/KIF11/FAM83D/ECT2/CDK1	32
CC	GO:0000922	spindle pole	28/848	169/19594	9.29639e-10	5.78442e-08	4.52316e-08	NUBP2/RAE1/PLK1/DCTN1/POC1A/KNSTRN/NDE1/PLK4/CDC6/CALM2/TPX2/PRC1/HAUS8/NEK2/AURKB/AURKA/SPAG5/CDC20/SGO1/TUBG1/CKAP2L/CCNB1/TACC3/KNTC1/MAD2L1/CENPF/KIF11/FAM83D	28
CC	GO:0098798	mitochondrial protein-containing complex	37/848	281/19594	1.66707e-09	9.33558e-08	7.3e-08	MRPS34/NDUFB10/MRPL28/MTX1/NDUFAB1/MRPL46/TOMM22/MRPS18B/MRPS5/MRPS11/PHB1/MRPL27/DNAJC19/MRPL10/IMMT/MRPS7/BAX/MRPL47/NDUFB3/BCKDK/MRPS18A/MRPL13/MRPL36/POLG/NDUFS1/TIMM17A/COX5A/MRPL11/MRPS9/PNPT1/CHCHD10/PPIF/NDUFS6/NDUFB9/MRPS24/MCCC1/MRPL12	37
CC	GO:0005743	mitochondrial inner membrane	52/848	491/19594	2.54769e-09	1.297e-07	1.0142e-07	MRPS34/NDUFB10/TRAP1/MRPL28/MTX1/TMEM186/NDUFAB1/MRPL46/MRPS23/MRPS18B/MRPS5/MRPS11/PHB1/MRPL27/DNAJC19/MRPL10/COA3/ERAL1/MAIP1/IMMT/MRPS7/MRPL47/COQ7/NDUFB3/CNP/MRPS18A/OPA1/MRPL13/SPHK2/RAB5IF/MRPL36/NDUFS1/TMEM177/SHMT2/TIMM17A/COX5A/MRPL11/MRPS9/HSPD1/SLC25A10/SQOR/CHCHD10/MTFP1/FLVCR1/BDH1/NDUFS6/NME4/NDUFB9/MRPS24/MTLN/MRPL12/CYP27A1	52
CC	GO:0000228	nuclear chromosome	31/848	228/19594	1.63404e-08	7.6255e-07	5.9628e-07	UBE2I/SLX4/PLK1/ORC6/GINS3/SRCAP/NIFK/ACTL6A/BLM/SMARCB1/RAD51/NEK2/BIRC5/H4C9/TIMELESS/PRIM2/CDC45/TUBG1/MCM5/H4C14/MCM3/H3C6/HDAC2/INCENP/GINS1/MCM10/CHEK1/P3H4/PRIM1/GINS4/BRCA2	31
CC	GO:0000313	organellar ribosome	17/848	81/19594	5.30205e-08	2.12082e-06	1.65838e-06	MRPS34/MRPL28/MRPL46/MRPS18B/MRPS5/MRPS11/MRPL27/MRPL10/MRPS7/MRPL47/MRPS18A/MRPL13/MRPL36/MRPL11/MRPS9/MRPS24/MRPL12	17
CC	GO:0005761	mitochondrial ribosome	17/848	81/19594	5.30205e-08	2.12082e-06	1.65838e-06	MRPS34/MRPL28/MRPL46/MRPS18B/MRPS5/MRPS11/MRPL27/MRPL10/MRPS7/MRPL47/MRPS18A/MRPL13/MRPL36/MRPL11/MRPS9/MRPS24/MRPL12	17
CC	GO:0005681	spliceosomal complex	26/848	194/19594	3.09119e-07	1.15405e-05	9.02412e-06	SRRM2/SNRNP25/ZCRB1/SNRPD3/CTNNBL1/RALY/LUC7L/NCL/ZNF830/SNRPG/SF3B4/USP39/LSM6/LSM2/SNRPC/SNRPA1/PHF5A/HNRNPF/HTATSF1/SF3B5/ZMAT2/PPIL1/LSM3/ALYREF/PABPC1/SNRPE	26
CC	GO:0005876	spindle microtubule	16/848	83/19594	4.48181e-07	1.56863e-05	1.2266e-05	MAPRE1/CHMP4B/PLK1/SKA3/CALM2/PRC1/HAUS8/AURKB/AURKA/BIRC5/TUBG1/KIF18A/KIF18B/KNTC1/KIF11/CDK1	16
CC	GO:0071005	U2-type precatalytic spliceosome	12/848	50/19594	1.06205e-06	3.3584e-05	2.62612e-05	SRRM2/SNRPD3/SNRPG/SF3B4/LSM6/LSM2/SNRPA1/PHF5A/SF3B5/ZMAT2/LSM3/SNRPE	12
CC	GO:0005874	microtubule	42/848	435/19594	1.07949e-06	3.3584e-05	2.62612e-05	MAPRE1/CHMP4B/PLK1/MAP7/KIF22/DCTN1/KNSTRN/NDE1/TUBA1C/OPA1/SKA3/TUBB/CALM2/CDK2AP2/EML4/TPX2/PRC1/KIFC1/HAUS8/TUBD1/NEK2/AURKB/KIF21A/AURKA/BIRC5/IQGAP1/SPAG5/CCT5/TUBG1/HSPH1/FHDC1/KIF18A/KIF18B/KIF23/GAS2L1/RACGAP1/TTLL13/TTLL4/KNTC1/INCENP/KIF11/CDK1	42
CC	GO:0005684	U2-type spliceosomal complex	16/848	92/19594	1.89889e-06	5.52252e-05	4.31836e-05	SRRM2/SNRPD3/LUC7L/SNRPG/SF3B4/LSM6/LSM2/SNRPC/SNRPA1/PHF5A/HTATSF1/SF3B5/ZMAT2/PPIL1/LSM3/SNRPE	16
CC	GO:0051233	spindle midzone	10/848	36/19594	1.99288e-06	5.52252e-05	4.31836e-05	MAPRE1/PLK1/CDC6/PRC1/AURKB/AURKA/KIF18A/KIF18B/RACGAP1/INCENP	10
CC	GO:0071011	precatalytic spliceosome	12/848	53/19594	2.07094e-06	5.52252e-05	4.31836e-05	SRRM2/SNRPD3/SNRPG/SF3B4/LSM6/LSM2/SNRPA1/PHF5A/SF3B5/ZMAT2/LSM3/SNRPE	12
CC	GO:0071162	CMG complex	6/848	11/19594	2.47468e-06	6.2992e-05	4.92569e-05	GINS3/CDC45/MCM5/MCM3/GINS1/GINS4	6
CC	GO:0045171	intercellular bridge	14/848	75/19594	3.48436e-06	8.48365e-05	6.63383e-05	SNRNP25/AAMP/DCTN1/NGRN/CDC6/TPX2/PRC1/NCAPH2/TMEM9/PARP3/PYCR3/NUPR1/CEP55/FAM83D	14
CC	GO:0031261	DNA replication preinitiation complex	6/848	12/19594	4.76771e-06	0.000111246	8.69897e-05	GINS3/CDC45/MCM5/MCM3/GINS1/GINS4	6
CC	GO:0044815	DNA packaging complex	24/848	198/19594	5.26867e-06	0.000118018	9.22849e-05	ACTB/SMARCD2/NCAPH/BCL7C/GLYR1/ACTL6A/SMARCB1/SPHK2/SPC25/H4C9/H2BC12/NCAPH2/H1-0/YEATS4/SGO2/H4C14/H3C6/SPC24/NCAPG/H2AZ1/SMC4/H2BC7/NUF2/H2AC11	24
CC	GO:0030496	midbody	24/848	203/19594	8.10838e-06	0.000174642	0.000136562	SHCBP1/CHMP4B/PLK1/TXNDC9/VPS37B/EML4/PRC1/TTLL12/NEK2/KEAP1/AURKB/AURKA/BIRC5/IQGAP1/SPAG5/NAT10/KIF23/RACGAP1/ANLN/INCENP/CENPF/CEP55/ECT2/CDK1	24
CC	GO:0000314	organellar small ribosomal subunit	8/848	26/19594	9.28035e-06	0.000185607	0.000145136	MRPS34/MRPS18B/MRPS5/MRPS11/MRPS7/MRPS18A/MRPS9/MRPS24	8
CC	GO:0005763	mitochondrial small ribosomal subunit	8/848	26/19594	9.28035e-06	0.000185607	0.000145136	MRPS34/MRPS18B/MRPS5/MRPS11/MRPS7/MRPS18A/MRPS9/MRPS24	8
CC	GO:0032993	protein-DNA complex	25/848	220/19594	1.06392e-05	0.000205447	0.000160651	ACTB/JUP/GLYR1/WDR18/GINS3/ACTL6A/ATF6B/SPHK2/H4C9/H2BC12/PRIM2/CDC45/H1-0/YEATS4/MCM5/H4C14/MCM3/H3C6/GINS1/H2AZ1/NUPR1/H2BC7/PRIM1/GINS4/H2AC11	25
CC	GO:0005689	U12-type spliceosomal complex	8/848	29/19594	2.27149e-05	0.000424012	0.000331558	SNRNP25/ZCRB1/SNRPD3/SNRPG/SF3B4/PHF5A/SF3B5/SNRPE	8
CC	GO:0005635	nuclear envelope	41/848	479/19594	2.7036e-05	0.000488392	0.000381901	UBE2I/CLIC1/CHMP4B/LRRC59/MRPS23/RAE1/NUP93/AEN/ABCF1/SUMO1/DCTN1/BAX/TMEM97/DNASE1/NUP107/RANGAP1/ROGDI/TUBB/CSE1L/CPNE1/HTATIP2/NRM/VRK2/RANBP2/DTL/GTPBP4/NUDT1/CDK4/CREB3L4/RANBP1/JPT1/YEATS4/RAP1GAP2/MAD2L1/LMNB2/CENPF/BIN1/IPO5/PRKCZ/BRIP1/SLC29A2	41
CC	GO:0097525	spliceosomal snRNP complex	14/848	90/19594	3.07889e-05	0.000538806	0.000421322	SNRPD3/LUC7L/SNRPG/USP39/LSM6/LSM2/SNRPC/SNRPA1/PHF5A/HTATSF1/SF3B5/ZMAT2/LSM3/SNRPE	14
CC	GO:0000781	chromosome, telomeric region	20/848	166/19594	3.43158e-05	0.000582329	0.000455355	THOC6/TELO2/SLX4/BLM/DPY30/RAD51/FEN1/WRNIP1/ALYREF/H4C9/CBX1/NAT10/THOC3/MCM5/H4C14/MCM3/HDAC2/CHEK1/BRCA2/CDK1	20
CC	GO:0005686	U2 snRNP	7/848	25/19594	6.72458e-05	0.00107821	0.000843111	SNRPD3/SNRPG/SNRPA1/PHF5A/HTATSF1/SF3B5/SNRPE	7
CC	GO:0005814	centriole	18/848	147/19594	6.73881e-05	0.00107821	0.000843111	CCNF/TEDC2/NUBP2/WDR90/CEP20/PLK1/MKS1/DCTN1/POC1A/PLK4/IFT140/TUBD1/AURKA/TEDC1/TUBG1/PARP3/CEP55/CCDC78	18
CC	GO:0120114	Sm-like protein family complex	15/848	111/19594	8.71626e-05	0.00129663	0.00101391	SNRPD3/LUC7L/SNRPG/USP39/LSM6/LSM2/SNRPC/SNRPA1/PHF5A/HTATSF1/SF3B5/ZMAT2/LSM3/SNRPE/SMN1	15
CC	GO:0000940	outer kinetochore	5/848	12/19594	9.2152e-05	0.00129663	0.00101391	PLK1/SKA3/BUB1B/CCNB1/CENPF	5
CC	GO:0044391	ribosomal subunit	20/848	178/19594	9.25582e-05	0.00129663	0.00101391	MRPS34/MRPL28/MRPL46/RPS2/MRPS18B/MRPS5/MRPS11/MRPL27/MRPL10/MRPS7/MRPL47/MRPS18A/MRPL13/MRPL36/RPL39L/MRPL11/MRPS9/RPL3L/MRPS24/MRPL12	20
CC	GO:0000315	organellar large ribosomal subunit	10/848	54/19594	9.26166e-05	0.00129663	0.00101391	MRPL28/MRPL46/MRPL27/MRPL10/MRPL47/MRPS18A/MRPL13/MRPL36/MRPL11/MRPL12	10
CC	GO:0005762	mitochondrial large ribosomal subunit	10/848	54/19594	9.26166e-05	0.00129663	0.00101391	MRPL28/MRPL46/MRPL27/MRPL10/MRPL47/MRPS18A/MRPL13/MRPL36/MRPL11/MRPL12	10
CC	GO:0030532	small nuclear ribonucleoprotein complex	14/848	100/19594	0.000100923	0.00137846	0.00107789	SNRPD3/LUC7L/SNRPG/USP39/LSM6/LSM2/SNRPC/SNRPA1/PHF5A/HTATSF1/SF3B5/ZMAT2/LSM3/SNRPE	14
CC	GO:0030684	preribosome	12/848	78/19594	0.000124977	0.00166636	0.00130302	TBL3/NOP58/RSL1D1/EIF6/LTV1/RRP15/KRI1/ZNF622/RRP7A/WDR12/SLX9/RIOK1	12
CC	GO:0005840	ribosome	23/848	229/19594	0.000160285	0.00208744	0.00163228	MRPS34/MRPL28/MRPL46/RPS2/MRPS18B/MRPS5/MRPS11/MRPL27/MRPL10/MRPS7/MRPL47/MRPS18A/MRPL13/MRPL36/RPL39L/MRPL11/MRPS9/PNPT1/RPS6KL1/RPL3L/RPL13AP3/MRPS24/MRPL12	23
CC	GO:0005680	anaphase-promoting complex	6/848	21/19594	0.000200255	0.0025487	0.00199297	BUB1B/CDC20/ANAPC11/UBE2C/ANAPC1/UBE2S	6
CC	GO:0005657	replication fork	10/848	60/19594	0.000230861	0.00287293	0.0022465	RTF2/BLM/TIMELESS/PRIM2/RFC3/RFC4/MCM3/MCM10/CHEK1/PRIM1	10
CC	GO:0010369	chromocenter	5/848	15/19594	0.000313443	0.00376676	0.00294544	OIP5/AURKB/CBX1/INCENP/ESCO2	5
CC	GO:0046540	U4/U6 x U5 tri-snRNP complex	8/848	41/19594	0.000319155	0.00376676	0.00294544	SNRPD3/SNRPG/USP39/LSM6/LSM2/ZMAT2/LSM3/SNRPE	8
CC	GO:0000794	condensed nuclear chromosome	11/848	74/19594	0.000322866	0.00376676	0.00294544	UBE2I/PLK1/NIFK/BLM/RAD51/NEK2/TUBG1/INCENP/CHEK1/P3H4/BRCA2	11
CC	GO:0035371	microtubule plus-end	6/848	23/19594	0.000345914	0.0039533	0.0030913	MAPRE1/DCTN1/KNSTRN/SPAG5/KIF18B/GAS2L1	6
CC	GO:0097526	spliceosomal tri-snRNP complex	8/848	42/19594	0.000379471	0.00425008	0.00332337	SNRPD3/SNRPG/USP39/LSM6/LSM2/ZMAT2/LSM3/SNRPE	8
CC	GO:0071013	catalytic step 2 spliceosome	12/848	88/19594	0.000398185	0.00437223	0.00341888	SRRM2/SNRPD3/RALY/SNRPG/LSM2/SNRPA1/HNRNPF/PPIL1/LSM3/ALYREF/PABPC1/SNRPE	12
CC	GO:0030681	multimeric ribonuclease P complex	4/848	10/19594	0.000593348	0.00638991	0.00499662	RPP21/RPP40/RPP25/POP1	4
CC	GO:0000152	nuclear ubiquitin ligase complex	8/848	45/19594	0.000618044	0.00653027	0.00510638	RAD51/BUB1B/CDC20/ANAPC11/UBE2C/ANAPC1/UBE2S/BRCA2	8
CC	GO:0034663	endoplasmic reticulum chaperone complex	4/848	11/19594	0.000900552	0.00933906	0.00730272	DNAJB11/SDF2L1/P4HB/PDIA6	4
CC	GO:0035770	ribonucleoprotein granule	23/848	261/19594	0.00102152	0.0104009	0.00813306	ACTB/PCBP1/MCRIP2/FASTKD2/NCL/EDC3/SNRPG/SUMO1/CNOT9/FXR1/LSM6/LSM2/PSMA4/TUBB/NSUN2/CARHSP1/LSM3/IQGAP1/CKAP4/GRB7/PABPC1/HENMT1/SMN1	23
CC	GO:0000307	cyclin-dependent protein kinase holoenzyme complex	8/848	49/19594	0.00111037	0.0109089	0.00853023	CCNF/CKS1B/CNPPD1/CDK4/CCNB2/CCNA2/CCNB1/CDK1	8
CC	GO:0005871	kinesin complex	8/848	49/19594	0.00111037	0.0109089	0.00853023	KIF22/NDE1/KIFC1/KIF21A/KIF18A/KIF18B/KIF23/KIF11	8
CC	GO:0030686	90S preribosome	6/848	29/19594	0.00130418	0.012592	0.00984641	TBL3/RSL1D1/KRI1/RRP7A/WDR12/SLX9	6
CC	GO:0005732	sno(s)RNA-containing ribonucleoprotein complex	6/848	30/19594	0.00157129	0.0146653	0.0114676	NOP58/LSM6/DKC1/RPP40/RPP25/POP1	6
CC	GO:0071007	U2-type catalytic step 2 spliceosome	6/848	30/19594	0.00157129	0.0146653	0.0114676	SRRM2/SNRPD3/SNRPG/SNRPA1/PPIL1/SNRPE	6
CC	GO:0000795	synaptonemal complex	7/848	41/19594	0.00172149	0.0155489	0.0121585	UBE2I/PLK1/BLM/RAD51/INCENP/P3H4/BRCA2	7
CC	GO:0099086	synaptonemal structure	7/848	41/19594	0.00172149	0.0155489	0.0121585	UBE2I/PLK1/BLM/RAD51/INCENP/P3H4/BRCA2	7
CC	GO:0000800	lateral element	4/848	13/19594	0.00182046	0.015929	0.0124558	BLM/RAD51/INCENP/BRCA2	4
CC	GO:0045120	pronucleus	4/848	13/19594	0.00182046	0.015929	0.0124558	AURKA/CBX1/CCNA2/CENPF	4
CC	GO:0034708	methyltransferase complex	11/848	92/19594	0.00205467	0.0177018	0.013842	SNRPD3/SETD1A/C17orf49/SNRPG/RAMAC/DPY30/JARID2/PAGR1/SNRPE/RIOK1/HDAC2	11
CC	GO:0036464	cytoplasmic ribonucleoprotein granule	21/848	243/19594	0.0021022	0.0178368	0.0139476	ACTB/PCBP1/MCRIP2/NCL/EDC3/SNRPG/CNOT9/FXR1/LSM6/LSM2/PSMA4/TUBB/NSUN2/CARHSP1/LSM3/IQGAP1/CKAP4/GRB7/PABPC1/HENMT1/SMN1	21
CC	GO:0031970	organelle envelope lumen	11/848	93/19594	0.00224132	0.0187334	0.0146487	GFER/TRAP1/IMMT/MIX23/OPA1/TUBB/NDUFS1/PNPT1/CAPN2/CHCHD10/NME4	11
CC	GO:0001741	XY body	4/848	14/19594	0.00246198	0.0194184	0.0151843	SUMO1/PLK4/SMARCB1/ESCO2	4
CC	GO:0030677	ribonuclease P complex	4/848	14/19594	0.00246198	0.0194184	0.0151843	RPP21/RPP40/RPP25/POP1	4
CC	GO:0031616	spindle pole centrosome	4/848	14/19594	0.00246198	0.0194184	0.0151843	NUBP2/NDE1/AURKB/AURKA	4
CC	GO:1990023	mitotic spindle midzone	4/848	14/19594	0.00246198	0.0194184	0.0151843	PRC1/AURKB/KIF18A/KIF18B	4
CC	GO:1990752	microtubule end	6/848	33/19594	0.00262495	0.0204163	0.0159646	MAPRE1/DCTN1/KNSTRN/SPAG5/KIF18B/GAS2L1	6
CC	GO:1904813	ficolin-1-rich granule lumen	13/848	124/19594	0.00279069	0.0213427	0.016689	KCMF1/JUP/ALDOA/PSMD11/C1orf35/IMPDH1/HMGB1/PKM/PSMD2/HSP90AA1/ILF2/VCL/MIF	13
CC	GO:0015935	small ribosomal subunit	9/848	69/19594	0.00282028	0.0213427	0.016689	MRPS34/RPS2/MRPS18B/MRPS5/MRPS11/MRPS7/MRPS18A/MRPS9/MRPS24	9
CC	GO:0005758	mitochondrial intermembrane space	10/848	83/19594	0.00305192	0.0227877	0.0178189	GFER/TRAP1/IMMT/MIX23/OPA1/NDUFS1/PNPT1/CAPN2/CHCHD10/NME4	10
CC	GO:0000151	ubiquitin ligase complex	24/848	302/19594	0.00319953	0.0235755	0.018435	KCTD5/TRAF7/CCNF/ELOB/STUB1/SPSB3/CKS1B/FBXL19/RNF40/RAD51/KEAP1/DTL/BUB1B/RNF168/CDC20/ANAPC11/FBXO45/FBXL18/UBE2C/RNF144B/ANAPC1/UBE2S/DCUN1D5/BRCA2	24
CC	GO:0015934	large ribosomal subunit	12/848	112/19594	0.00333805	0.0242767	0.0189833	MRPL28/MRPL46/MRPL27/MRPL10/MRPL47/MRPS18A/MRPL13/MRPL36/RPL39L/MRPL11/RPL3L/MRPL12	12
CC	GO:0000786	nucleosome	13/848	129/19594	0.00393482	0.0278938	0.0218117	ACTB/GLYR1/ACTL6A/SPHK2/H4C9/H2BC12/H1-0/YEATS4/H4C14/H3C6/H2AZ1/H2BC7/H2AC11	13
CC	GO:0031461	cullin-RING ubiquitin ligase complex	16/848	175/19594	0.00393501	0.0278938	0.0218117	KCTD5/CCNF/ELOB/SPSB3/CKS1B/FBXL19/KEAP1/DTL/BUB1B/CDC20/ANAPC11/FBXO45/FBXL18/UBE2C/ANAPC1/UBE2S	16
CC	GO:0005875	microtubule associated complex	15/848	160/19594	0.0040769	0.0285383	0.0223157	MAP7/KIF22/DCTN1/NDE1/KIFC1/HAUS8/AURKB/KIF21A/AURKA/BIRC5/KIF18A/KIF18B/KIF23/INCENP/KIF11	15
CC	GO:0097431	mitotic spindle pole	6/848	36/19594	0.00413569	0.0285924	0.022358	RAE1/PLK1/AURKB/AURKA/SPAG5/FAM83D	6
CC	GO:0043596	nuclear replication fork	5/848	28/19594	0.00643464	0.0439439	0.0343622	TIMELESS/PRIM2/MCM3/MCM10/PRIM1	5
CC	GO:0034719	SMN-Sm protein complex	4/848	18/19594	0.00655715	0.0441125	0.034494	SNRPD3/SNRPG/SNRPE/SMN1	4
CC	GO:0034451	centriolar satellite	11/848	107/19594	0.00661688	0.0441125	0.034494	CEP20/UBN1/PLK1/KNSTRN/KEAP1/SPAG5/RPP25/TACC3/CEP55/CENPU/RASSF7	11
CC	GO:0101002	ficolin-1-rich granule	16/848	185/19594	0.00669668	0.0441193	0.0344993	ATP6V0C/KCMF1/JUP/ALDOA/PSMD11/C1orf35/IMPDH1/HMGB1/PKM/PSMD2/HSP90AA1/ILF2/VCL/MIF/TRPM2/DSP	16
CC	GO:0005643	nuclear pore	10/848	93/19594	0.0068992	0.044925	0.0351293	CHMP4B/RAE1/NUP93/SUMO1/NUP107/RANGAP1/RANBP2/RANBP1/MAD2L1/IPO5	10
CC	GO:1905369	endopeptidase complex	9/848	79/19594	0.00699361	0.0450163	0.0352007	PSMD1/PSME4/PIGU/PSMA4/PSMD11/ADRM1/PSMA7/PSMD2/CAPN2	9
CC	GO:0000172	ribonuclease MRP complex	3/848	10/19594	0.0077132	0.0479933	0.0375286	RPP40/RPP25/POP1	3
CC	GO:0000346	transcription export complex	3/848	10/19594	0.0077132	0.0479933	0.0375286	THOC6/ALYREF/THOC3	3
CC	GO:0005916	fascia adherens	3/848	10/19594	0.0077132	0.0479933	0.0375286	JUP/VCL/DSP	3
CC	GO:0005838	proteasome regulatory particle	4/848	19/19594	0.00802555	0.0488512	0.0381994	PSMD1/PSMD11/ADRM1/PSMD2	4
CC	GO:0042575	DNA polymerase complex	4/848	19/19594	0.00802555	0.0488512	0.0381994	POLG/PRIM2/MCM3/PRIM1	4
CC	GO:0032154	cleavage furrow	7/848	55/19594	0.00922569	0.0555526	0.0434396	STAMBP/NDE1/PLK4/RACGAP1/ICAM2/CEP55/ECT2	7
CC	GO:0031305	integral component of mitochondrial inner membrane	7/848	56/19594	0.0101606	0.058674	0.0458804	MTX1/COA3/IMMT/TMEM177/TIMM17A/CHCHD10/MTLN	7
CC	GO:0000235	astral microtubule	3/848	11/19594	0.0102679	0.058674	0.0458804	MAPRE1/KIF18A/KIF18B	3
CC	GO:0005688	U6 snRNP	3/848	11/19594	0.0102679	0.058674	0.0458804	LSM6/LSM2/LSM3	3
CC	GO:0005818	aster	3/848	11/19594	0.0102679	0.058674	0.0458804	MAPRE1/KIF18A/KIF18B	3
CC	GO:0106068	SUMO ligase complex	3/848	11/19594	0.0102679	0.058674	0.0458804	UBE2I/RANGAP1/RANBP2	3
CC	GO:1902554	serine/threonine protein kinase complex	10/848	99/19594	0.0105708	0.0597944	0.0467565	CCNF/CKS1B/CNPPD1/CALM2/CDK4/CCNB2/CCNA2/PHKB/CCNB1/CDK1	10
CC	GO:0031304	intrinsic component of mitochondrial inner membrane	7/848	57/19594	0.0111626	0.0614767	0.048072	MTX1/COA3/IMMT/TMEM177/TIMM17A/CHCHD10/MTLN	7
CC	GO:0009295	nucleoid	6/848	44/19594	0.0111975	0.0614767	0.048072	MPG/LRRC59/FASTKD2/TUFM/POLG/SHMT2	6
CC	GO:0042645	mitochondrial nucleoid	6/848	44/19594	0.0111975	0.0614767	0.048072	MPG/LRRC59/FASTKD2/TUFM/POLG/SHMT2	6
CC	GO:0031965	nuclear membrane	22/848	300/19594	0.0114639	0.0623281	0.0487378	CLIC1/MRPS23/NUP93/AEN/SUMO1/TMEM97/NUP107/RANGAP1/CPNE1/NRM/RANBP2/DTL/GTPBP4/NUDT1/CDK4/CREB3L4/JPT1/YEATS4/RAP1GAP2/LMNB2/BRIP1/SLC29A2	22
CC	GO:0043296	apical junction complex	13/848	148/19594	0.0121284	0.0653067	0.0510669	ACTB/UBN1/F11R/JUP/MARVELD3/CDK4/TRAF4/EPCAM/NECTIN1/PDZD3/SAPCD2/PRKCZ/ECT2	13
CC	GO:0005685	U1 snRNP	5/848	33/19594	0.0130131	0.0693812	0.054253	SNRPD3/LUC7L/SNRPG/SNRPC/SNRPE	5
CC	GO:0034709	methylosome	3/848	12/19594	0.0132557	0.0693812	0.054253	SNRPD3/SNRPG/SNRPE	3
CC	GO:0000502	proteasome complex	7/848	59/19594	0.0133781	0.0693812	0.054253	PSMD1/PSME4/PSMA4/PSMD11/ADRM1/PSMA7/PSMD2	7
CC	GO:0032153	cell division site	8/848	73/19594	0.0133807	0.0693812	0.054253	STAMBP/NDE1/PLK4/RACGAP1/ANLN/ICAM2/CEP55/ECT2	8
CC	GO:0005697	telomerase holoenzyme complex	4/848	22/19594	0.0136694	0.0702279	0.0549151	SNRPD3/DKC1/NAT10/SNRPE	4
CC	GO:0101031	chaperone complex	5/848	34/19594	0.014727	0.0749738	0.0586261	STUB1/DNAJB11/SDF2/SDF2L1/CCT5	5
CC	GO:1990204	oxidoreductase complex	11/848	120/19594	0.0150147	0.0757496	0.0592328	NDUFB10/NDUFAB1/NDUFB3/BCKDK/NDUFS1/ETFA/P4HB/NDUFS6/NDUFB9/HSD17B8/RRM2	11
CC	GO:0005721	pericentric heterochromatin	4/848	23/19594	0.0159927	0.0785605	0.0614307	CBX1/INCENP/ESCO2/SNAI1	4
CC	GO:0022624	proteasome accessory complex	4/848	23/19594	0.0159927	0.0785605	0.0614307	PSMD1/PSMD11/ADRM1/PSMD2	4
CC	GO:0030687	preribosome, large subunit precursor	4/848	23/19594	0.0159927	0.0785605	0.0614307	EIF6/RRP15/ZNF622/WDR12	4
CC	GO:0005687	U4 snRNP	3/848	13/19594	0.0166862	0.0805543	0.0629898	SNRPD3/SNRPG/SNRPE	3
CC	GO:0043601	nuclear replisome	3/848	13/19594	0.0166862	0.0805543	0.0629898	PRIM2/MCM3/PRIM1	3
CC	GO:0098800	inner mitochondrial membrane protein complex	13/848	155/19594	0.0172725	0.0826717	0.0646455	NDUFB10/MTX1/NDUFAB1/PHB1/DNAJC19/IMMT/NDUFB3/NDUFS1/TIMM17A/COX5A/CHCHD10/NDUFS6/NDUFB9	13
CC	GO:0005747	mitochondrial respiratory chain complex I	6/848	49/19594	0.0185093	0.086377	0.0675429	NDUFB10/NDUFAB1/NDUFB3/NDUFS1/NDUFS6/NDUFB9	6
CC	GO:0030964	NADH dehydrogenase complex	6/848	49/19594	0.0185093	0.086377	0.0675429	NDUFB10/NDUFAB1/NDUFB3/NDUFS1/NDUFS6/NDUFB9	6
CC	GO:0045271	respiratory chain complex I	6/848	49/19594	0.0185093	0.086377	0.0675429	NDUFB10/NDUFAB1/NDUFB3/NDUFS1/NDUFS6/NDUFB9	6
CC	GO:0015030	Cajal body	8/848	79/19594	0.0207582	0.0960708	0.0751231	SRRM2/NOP58/OIP5/SNRPC/LSG1/COIL/DKC1/SMN1	8
CC	GO:0034399	nuclear periphery	11/848	127/19594	0.0219971	0.10076	0.0787899	TELO2/PRR14/NUP93/EIF6/NUP107/BLM/PHF5A/YEATS4/CENPF/CENPW/PRKCZ	11
CC	GO:1905368	peptidase complex	10/848	111/19594	0.0221313	0.10076	0.0787899	SGF29/PSMD1/PSME4/PIGU/PSMA4/PSMD11/ADRM1/PSMA7/PSMD2/CAPN2	10
CC	GO:0016514	SWI/SNF complex	4/848	26/19594	0.0243851	0.108076	0.0845109	SMARCD2/BCL7C/ACTL6A/SMARCB1	4
CC	GO:0090734	site of DNA damage	9/848	97/19594	0.0245833	0.108076	0.0845109	HROB/RAD51/CBX1/TIMELESS/RNF168/RFWD3/TRAIP/PARP3/ESCO2	9
CC	GO:0005852	eukaryotic translation initiation factor 3 complex	3/848	15/19594	0.0248962	0.108076	0.0845109	EIF3J/EIF3CL/EIF3C	3
CC	GO:0030688	preribosome, small subunit precursor	3/848	15/19594	0.0248962	0.108076	0.0845109	LTV1/SLX9/RIOK1	3
CC	GO:0030894	replisome	3/848	15/19594	0.0248962	0.108076	0.0845109	PRIM2/MCM3/PRIM1	3
CC	GO:0033290	eukaryotic 48S preinitiation complex	3/848	15/19594	0.0248962	0.108076	0.0845109	EIF3J/EIF3CL/EIF3C	3
CC	GO:1902911	protein kinase complex	10/848	115/19594	0.0274994	0.118298	0.092504	CCNF/CKS1B/CNPPD1/CALM2/CDK4/CCNB2/CCNA2/PHKB/CCNB1/CDK1	10
CC	GO:0032585	multivesicular body membrane	4/848	27/19594	0.0276734	0.118298	0.092504	CHMP4B/TMEM9/PMEL/ABCA3	4
CC	GO:0000792	heterochromatin	7/848	69/19594	0.0293031	0.124316	0.0972098	EME1/HMGA1/CBX1/INCENP/ESCO2/H2AZ1/SNAI1	7
CC	GO:0016607	nuclear speck	26/848	411/19594	0.0348147	0.143729	0.11239	RNPS1/THOC6/SRRM2/PARN/SETD1A/RBBP6/PCBP1/RSRC1/ASCC1/ZNF830/OIP5/KIF22/SUMO1/PSME4/SNRPA1/PHF5A/UNC45A/NSL1/ALYREF/RMI2/CKAP4/CDYL/GLIS2/THOC3/PACSIN2/SMC4	26
CC	GO:0016282	eukaryotic 43S preinitiation complex	3/848	17/19594	0.0349057	0.143729	0.11239	EIF3J/EIF3CL/EIF3C	3
CC	GO:0071004	U2-type prespliceosome	3/848	17/19594	0.0349057	0.143729	0.11239	LUC7L/SNRPG/SNRPC	3
CC	GO:0071010	prespliceosome	3/848	17/19594	0.0349057	0.143729	0.11239	LUC7L/SNRPG/SNRPC	3
CC	GO:0032592	integral component of mitochondrial membrane	8/848	88/19594	0.0366218	0.149695	0.117055	RHOT2/MTX1/COA3/IMMT/TMEM177/TIMM17A/CHCHD10/MTLN	8
CC	GO:0000803	sex chromosome	4/848	30/19594	0.0390554	0.158486	0.123929	SUMO1/PLK4/SMARCB1/ESCO2	4
CC	GO:0005828	kinetochore microtubule	3/848	18/19594	0.0405754	0.161765	0.126493	CHMP4B/KIF18A/KNTC1	3
CC	GO:0070993	translation preinitiation complex	3/848	18/19594	0.0405754	0.161765	0.126493	EIF3J/EIF3CL/EIF3C	3
CC	GO:0001650	fibrillar center	11/848	140/19594	0.0408271	0.161765	0.126493	NOP58/RAE1/ORC6/COIL/DSN1/EZR/SMARCB1/DKC1/CCDC137/TRAF4/SNAI1	11
CC	GO:0098573	intrinsic component of mitochondrial membrane	8/848	90/19594	0.041019	0.161765	0.126493	RHOT2/MTX1/COA3/IMMT/TMEM177/TIMM17A/CHCHD10/MTLN	8
CC	GO:0043209	myelin sheath	5/848	45/19594	0.0439748	0.172209	0.13466	CNP/CALM2/HSP90AA1/PRXL2B/PRKCZ	5
CC	GO:0017053	transcription repressor complex	7/848	76/19594	0.0460102	0.178929	0.139914	HDGF/TFAP4/HMGB1/GMNN/H1-0/ETV3/BIN1	7
MF	GO:0045296	cadherin binding	41/844	333/18410	8.61966e-09	6.96469e-06	6.45114e-06	MAPRE1/CLIC1/PCBP1/CHMP4B/LRRC59/RSL1D1/RPS2/ATIC/TXNDC9/F11R/ZC3H15/ABCF3/JUP/ALDOA/PFN1/SLC9A3R2/RANGAP1/PDXDC1/EZR/UNC45A/BZW2/PRDX1/PKM/VASN/IQGAP1/CNN2/PPL/CCNB2/RANBP1/STK38/VCL/PDLIM1/CIP2A/PACSIN2/EPCAM/H3C6/S100A11/ANLN/PAICS/LAD1/CDC42EP1	41
MF	GO:0017116	single-stranded DNA helicase activity	9/844	23/18410	3.92028e-07	0.000158379	0.000146701	CHTF18/RAD51/WRNIP1/POLQ/RFC3/RFC4/MCM5/MCM3/DSCC1	9
MF	GO:0140097	catalytic activity, acting on DNA	26/844	222/18410	1.12674e-05	0.00303468	0.00281091	NTHL1/CHTF18/MPG/DNASE1/BLM/POLG/LIG1/RAD51/DKC1/NME1/EXO1/FEN1/WRNIP1/ERCC6L/POLQ/DNMT3B/RFC3/RFC4/MCM5/MCM3/ATAD5/DSCC1/UNG/NEIL3/DNASE1L2/BRIP1	26
MF	GO:0016893	endonuclease activity, active with either ribo- or deoxyribonucleic acids and producing 5'-phosphomonoesters	10/844	44/18410	2.33097e-05	0.00470856	0.00436137	EDC3/DNASE1/RPP21/EXO1/FEN1/RPP40/RPP25/RNASEH2A/POP1/DNASE1L2	10
MF	GO:0003735	structural constituent of ribosome	22/844	181/18410	2.94851e-05	0.0047648	0.00441346	MRPS34/MRPL28/MRPL46/MRPS23/RPS2/MRPS18B/MRPS5/MRPS11/MRPL27/MRPL10/MRPS7/MRPL47/MRPS18A/MRPL13/MRPL36/RPL39L/MRPL11/MRPS9/RPL3L/RPL13AP3/MRPS24/MRPL12	22
MF	GO:0070182	DNA polymerase binding	7/844	22/18410	3.8651e-05	0.005205	0.0048212	FANCI/HMGB1/RAD51/HSP90AA1/NAT10/CDT1/CDK2AP1	7
MF	GO:0008017	microtubule binding	28/844	272/18410	5.69441e-05	0.00598425	0.005543	MAPRE1/RAE1/PLK1/KIF22/DCTN1/KNSTRN/NDE1/OPA1/EZR/EML4/TPX2/PRC1/KIFC1/HAUS8/KIF21A/BIRC5/SPAG5/FHDC1/KIF18A/KIF18B/KIF23/GAS2L1/RACGAP1/SPC24/CENPF/KIF11/FES/FAM83D	28
MF	GO:0015631	tubulin binding	35/844	376/18410	5.925e-05	0.00598425	0.005543	MAPRE1/RAE1/PLK1/KIF22/DCTN1/KNSTRN/ALDOA/NDE1/OPA1/EZR/EML4/TPX2/PRC1/KIFC1/HAUS8/TTLL12/KIF21A/BIRC5/SPAG5/CCT5/HSPH1/FHDC1/KIF18A/KIF18B/KIF23/GAS2L1/RACGAP1/TTLL13/TTLL4/SPC24/CENPF/KIF11/FES/FAM83D/BRCA2	35
MF	GO:0003678	DNA helicase activity	12/844	72/18410	9.68995e-05	0.00869942	0.00805796	CHTF18/BLM/RAD51/WRNIP1/ERCC6L/POLQ/RFC3/RFC4/MCM5/MCM3/DSCC1/BRIP1	12
MF	GO:0016891	endoribonuclease activity, producing 5'-phosphomonoesters	8/844	34/18410	0.000118336	0.00956154	0.00885651	EDC3/RPP21/EXO1/FEN1/RPP40/RPP25/RNASEH2A/POP1	8
MF	GO:0008022	protein C-terminus binding	20/844	179/18410	0.000214236	0.0152002	0.0140794	AXIN1/USP7/MAPRE1/PHB1/NCL/VTA1/COIL/SLC9A3R2/PPP1R9B/EZR/RAD51/CDC20/MIF4GD/MDC1/YEATS4/PABPC1/MAD2L1/CENPF/PDZD3/BRCA2	20
MF	GO:0016887	ATP hydrolysis activity	30/844	325/18410	0.000225745	0.0152002	0.0140794	TRAP1/NUBP2/CHTF18/DDX27/KIF22/HSPE1/SRCAP/BLM/KIFC1/WRNIP1/DDX18/ERCC6L/KIF21A/HSPD1/CCT5/HSP90AA1/TRIP13/RFC4/HSPH1/KIF18A/KIF18B/KIF23/MCM5/MCM3/ATAD5/ABCD1/ATAD2/SMC4/ABCA3/BRIP1	30
MF	GO:0016853	isomerase activity	18/844	155/18410	0.00027074	0.0168275	0.0155867	RPUSD1/ECI1/RPUSD2/PMM2/RPIA/RPE/PPIL1/CRELD2/DKC1/HSPD1/P4HB/PDIA6/PPIF/DEGS1/DDT/MIF/EHHADH/GALM	18
MF	GO:0090079	translation regulator activity, nucleic acid binding	14/844	108/18410	0.000414153	0.0239026	0.0221401	EIF5B/GSPT1/EIF3J/ABCF1/EIF2S2/EIF6/EIF3CL/MTIF2/TUFM/SHMT2/EIF3C/MIF4GD/EEF1B2/PABPC1	14
MF	GO:0051539	4 iron, 4 sulfur cluster binding	8/844	41/18410	0.000468788	0.025252	0.0233901	CIAO3/NTHL1/NUBP2/CDK5RAP1/ISCA2/NDUFS1/PRIM2/BRIP1	8
MF	GO:0003688	DNA replication origin binding	5/844	16/18410	0.000572584	0.0272146	0.0252079	CDC6/HSPD1/CDC45/MCM5/MCM10	5
MF	GO:0035173	histone kinase activity	5/844	16/18410	0.000572584	0.0272146	0.0252079	AURKB/AURKA/HASPIN/CHEK1/CDK1	5
MF	GO:0033204	ribonuclease P RNA binding	4/844	10/18410	0.000737718	0.0331153	0.0306735	RPP21/RPP40/RPP25/POP1	4
MF	GO:0008094	ATP-dependent activity, acting on DNA	13/844	103/18410	0.000849802	0.0361389	0.0334742	CHTF18/BLM/RAD51/WRNIP1/ERCC6L/POLQ/RFC3/RFC4/MCM5/MCM3/ATAD5/DSCC1/BRIP1	13
MF	GO:0003684	damaged DNA binding	10/844	68/18410	0.00101213	0.0408902	0.0378751	NTHL1/MPG/CREBBP/BLM/HMGB1/FEN1/POLQ/HMGB2/UNG/NEIL3	10
MF	GO:0000217	DNA secondary structure binding	7/844	36/18410	0.00108037	0.0415684	0.0385033	BLM/HMGB1/HMGA1/HMGB2/H1-0/HMGB3/NEIL3	7
MF	GO:0003697	single-stranded DNA binding	14/844	120/18410	0.00119682	0.043956	0.0407149	PCBP1/HROB/BLM/HMGB1/RAD51/HSPD1/CDC45/HMGB2/MCM5/MCM3/SMC4/NEIL3/MCM10/BRCA2	14
MF	GO:0008135	translation factor activity, RNA binding	11/844	84/18410	0.00153813	0.054035	0.0500507	EIF5B/GSPT1/EIF3J/ABCF1/EIF2S2/EIF6/EIF3CL/MTIF2/TUFM/EIF3C/EEF1B2	11
MF	GO:0004526	ribonuclease P activity	4/844	12/18410	0.0016155	0.0543885	0.0503781	RPP21/RPP40/RPP25/POP1	4
MF	GO:0016538	cyclin-dependent protein serine/threonine kinase regulator activity	8/844	50/18410	0.00183171	0.0569239	0.0527266	CCNF/CKS1B/CNPPD1/CCNYL1/CDK4/CCNB2/CCNA2/CCNB1	8
MF	GO:0016860	intramolecular oxidoreductase activity	8/844	50/18410	0.00183171	0.0569239	0.0527266	ECI1/RPIA/CRELD2/P4HB/PDIA6/DDT/MIF/EHHADH	8
MF	GO:0031492	nucleosomal DNA binding	7/844	40/18410	0.00205823	0.0615944	0.0570526	ACTB/SMARCD2/ACTL6A/SMARCB1/H1-0/HDAC2/H2AZ1	7
MF	GO:0019104	DNA N-glycosylase activity	4/844	13/18410	0.00224938	0.0649107	0.0601244	NTHL1/MPG/UNG/NEIL3	4
MF	GO:0043539	protein serine/threonine kinase activator activity	8/844	53/18410	0.00268035	0.0746802	0.0691736	MLST8/CKS1B/CALM2/DBF4B/CCNYL1/IQGAP1/CCNB1/INCENP	8
MF	GO:0016863	intramolecular oxidoreductase activity, transposing C=C bonds	4/844	14/18410	0.0030358	0.0767712	0.0711104	ECI1/DDT/MIF/EHHADH	4
MF	GO:0002039	p53 binding	9/844	66/18410	0.00304044	0.0767712	0.0711104	AXIN1/USP7/BRD7/CREBBP/BLM/SMARCB1/SMYD2/HSPD1/RFWD3	9
MF	GO:0019843	rRNA binding	9/844	66/18410	0.00304044	0.0767712	0.0711104	MRPS11/FASTKD2/TACO1/ERAL1/MRPS7/NGRN/MRPS18A/MRPL11/TST	9
MF	GO:0031491	nucleosome binding	9/844	67/18410	0.00337265	0.0825788	0.0764898	ACTB/SMARCD2/GLYR1/ACTL6A/SMARCB1/RNF168/H1-0/HDAC2/H2AZ1	9
MF	GO:0004549	tRNA-specific ribonuclease activity	4/844	15/18410	0.00399099	0.092135	0.0853413	RPP21/RPP40/RPP25/POP1	4
MF	GO:0016888	endodeoxyribonuclease activity, producing 5'-phosphomonoesters	4/844	15/18410	0.00399099	0.092135	0.0853413	DNASE1/EXO1/FEN1/DNASE1L2	4
MF	GO:0004519	endonuclease activity	13/844	124/18410	0.00453146	0.101706	0.0942066	NTHL1/EME1/EDC3/DNASE1/EME2/RPP21/EXO1/FEN1/RPP40/RPP25/RNASEH2A/POP1/DNASE1L2	13
MF	GO:0004386	helicase activity	15/844	155/18410	0.00511844	0.111776	0.103534	CHTF18/DDX27/SRCAP/BLM/RAD51/WRNIP1/DDX18/ERCC6L/POLQ/RFC3/RFC4/MCM5/MCM3/DSCC1/BRIP1	15
MF	GO:0004518	nuclease activity	18/844	204/18410	0.00609448	0.129588	0.120033	NTHL1/PARN/EME1/EDC3/AEN/DNASE1/EME2/RPP21/POLG/NME1/EXO1/FEN1/PNPT1/RPP40/RPP25/RNASEH2A/POP1/DNASE1L2	18
MF	GO:0000400	four-way junction DNA binding	4/844	17/18410	0.00646884	0.130671	0.121035	BLM/HMGB1/HMGB2/HMGB3	4
MF	GO:0043024	ribosomal small subunit binding	4/844	17/18410	0.00646884	0.130671	0.121035	ERAL1/MTIF2/NME1/UNG	4
MF	GO:0048027	mRNA 5'-UTR binding	5/844	27/18410	0.00696729	0.137307	0.127182	RSL1D1/MRPS11/NCL/SHMT2/CCT5	5
MF	GO:0098641	cadherin binding involved in cell-cell adhesion	4/844	18/18410	0.0080198	0.154286	0.142909	PDLIM1/EPCAM/S100A11/CDC42EP1	4
MF	GO:0003743	translation initiation factor activity	7/844	51/18410	0.00827752	0.15554	0.144071	EIF5B/EIF3J/EIF2S2/EIF6/EIF3CL/MTIF2/EIF3C	7
MF	GO:0004523	RNA-DNA hybrid ribonuclease activity	3/844	10/18410	0.00904345	0.166071	0.153825	EXO1/FEN1/RNASEH2A	3
MF	GO:0016646	oxidoreductase activity, acting on the CH-NH group of donors, NAD or NADP as acceptor	4/844	19/18410	0.00979594	0.175892	0.162922	PYCR2/PYCR1/PYCR3/MTHFD2	4
MF	GO:0031072	heat shock protein binding	12/844	123/18410	0.0108825	0.189767	0.175774	TELO2/TSC2/DNAJA3/STUB1/DNAJA2/METTL22/BAX/UNC45A/PTGES3L/HDAC2/UNC45B/CDK1	12
MF	GO:0051536	iron-sulfur cluster binding	8/844	67/18410	0.0112733	0.189767	0.175774	CIAO3/NTHL1/NUBP2/CDK5RAP1/ISCA2/NDUFS1/PRIM2/BRIP1	8
MF	GO:0051540	metal cluster binding	8/844	67/18410	0.0112733	0.189767	0.175774	CIAO3/NTHL1/NUBP2/CDK5RAP1/ISCA2/NDUFS1/PRIM2/BRIP1	8
MF	GO:0000774	adenyl-nucleotide exchange factor activity	3/844	11/18410	0.0120157	0.198137	0.183527	PFN1/HSPBP1/HSPH1	3
MF	GO:0048156	tau protein binding	6/844	43/18410	0.013063	0.206958	0.191698	ACTB/STUB1/AATF/DCTN1/HSP90AA1/BIN1	6
MF	GO:0051879	Hsp90 protein binding	6/844	43/18410	0.013063	0.206958	0.191698	TELO2/TSC2/STUB1/UNC45A/PTGES3L/UNC45B	6
MF	GO:0051010	microtubule plus-end binding	4/844	21/18410	0.0140687	0.217793	0.201733	MAPRE1/DCTN1/KNSTRN/KIF18A	4
MF	GO:0030515	snoRNA binding	5/844	32/18410	0.0144009	0.217793	0.201733	TBL3/NOP58/NUDT16L1/DKC1/NUDT1	5
MF	GO:0019894	kinesin binding	6/844	44/18410	0.0145554	0.217793	0.201733	ACTB/PRC1/MAPK8IP3/KIF18B/CLSTN1/FAM83D	6
MF	GO:0004521	endoribonuclease activity	8/844	71/18410	0.0156895	0.230493	0.213497	EDC3/RPP21/EXO1/FEN1/RPP40/RPP25/RNASEH2A/POP1	8
MF	GO:0016829	lyase activity	16/844	195/18410	0.0177708	0.256407	0.2375	FAHD1/NTHL1/ECI1/ALDOA/PDXDC1/UMPS/HMGB1/CA7/POLQ/CDYL/DDT/FAHD2B/PAICS/EHHADH/NEIL3/ADCY9	16
MF	GO:0016779	nucleotidyltransferase activity	12/844	132/18410	0.0182479	0.257224	0.238257	POLR3K/GDPGP1/GMPPA/MOCS3/UAP1L1/COASY/POLG/DKC1/PNPT1/POLQ/PAPSS2/PRIM1	12
MF	GO:0016831	carboxy-lyase activity	5/844	34/18410	0.0184641	0.257224	0.238257	FAHD1/PDXDC1/UMPS/DDT/PAICS	5
MF	GO:0009982	pseudouridine synthase activity	3/844	13/18410	0.0194524	0.257665	0.238666	RPUSD1/RPUSD2/DKC1	3
MF	GO:0060590	ATPase regulator activity	3/844	13/18410	0.0194524	0.257665	0.238666	PFN1/HSPBP1/HSPH1	3
MF	GO:0061575	cyclin-dependent protein serine/threonine kinase activator activity	3/844	13/18410	0.0194524	0.257665	0.238666	CKS1B/CCNYL1/CCNB1	3
MF	GO:0097718	disordered domain specific binding	5/844	35/18410	0.020752	0.26876	0.248942	EZR/CALM2/PPIL1/KEAP1/HSP90AA1	5
MF	GO:0030295	protein kinase activator activity	10/844	104/18410	0.0209553	0.26876	0.248942	MLST8/CKS1B/CALM2/TPX2/DBF4B/CCNYL1/IQGAP1/CCNB1/GPRC5B/INCENP	10
MF	GO:0016879	ligase activity, forming carbon-nitrogen bonds	6/844	48/18410	0.0217083	0.274067	0.253859	GATB/GMPS/TTLL13/TTLL4/PAICS/MCCC1	6
MF	GO:0000030	mannosyltransferase activity	4/844	24/18410	0.0224163	0.278651	0.258105	ALG1/DPM1/ALG3/PIGZ	4
MF	GO:0051087	chaperone binding	10/844	106/18410	0.0235935	0.288585	0.267306	STUB1/DNAJA2/HSPE1/BAX/BIRC5/SDF2L1/HSPD1/PTGES3L/BIN1/CDC25A	10
MF	GO:0044548	S100 protein binding	3/844	14/18410	0.0239297	0.288585	0.267306	EZR/IQGAP1/S100A11	3
MF	GO:0043495	protein-membrane adaptor activity	4/844	25/18410	0.0257441	0.304981	0.282493	CIB1/JUP/SLC9A3R2/PDZD3	4
MF	GO:0016830	carbon-carbon lyase activity	6/844	50/18410	0.0260442	0.304981	0.282493	FAHD1/ALDOA/PDXDC1/UMPS/DDT/PAICS	6
MF	GO:0016835	carbon-oxygen lyase activity	8/844	79/18410	0.0280507	0.322105	0.298355	NTHL1/ECI1/CA7/POLQ/CDYL/FAHD2B/EHHADH/NEIL3	8
MF	GO:0140101	catalytic activity, acting on a tRNA	11/844	125/18410	0.0286499	0.322105	0.298355	GATB/EARS2/IARS2/METTL2A/PTRH2/NSUN2/RPP21/EPRS1/RPP40/RPP25/POP1	11
MF	GO:0008080	N-acetyltransferase activity	7/844	65/18410	0.0288121	0.322105	0.298355	NAA60/CREBBP/SRCAP/NAT10/ESCO2/BRCA2/SAT1	7
MF	GO:0019887	protein kinase regulator activity	16/844	207/18410	0.0291011	0.322105	0.298355	CCNF/MLST8/CIB1/CKS1B/CNPPD1/CALM2/TPX2/DBF4B/CCNYL1/IQGAP1/CDK4/CCNB2/CCNA2/CCNB1/GPRC5B/INCENP	16
MF	GO:0019209	kinase activator activity	10/844	110/18410	0.0295746	0.322923	0.299112	MLST8/CKS1B/CALM2/TPX2/DBF4B/CCNYL1/IQGAP1/CCNB1/GPRC5B/INCENP	10
MF	GO:0016866	intramolecular transferase activity	4/844	27/18410	0.0332461	0.354105	0.327995	RPUSD1/RPUSD2/PMM2/DKC1	4
MF	GO:0003777	microtubule motor activity	7/844	67/18410	0.0333069	0.354105	0.327995	KIF22/KIFC1/KIF21A/KIF18A/KIF18B/KIF23/KIF11	7
MF	GO:0045125	bioactive lipid receptor activity	3/844	16/18410	0.034403	0.361008	0.334388	SPHK2/LPAR3/S1PR5	3
MF	GO:0098632	cell-cell adhesion mediator activity	6/844	54/18410	0.036355	0.376601	0.348831	JUP/PDLIM1/EPCAM/S100A11/DSP/CDC42EP1	6
MF	GO:0008301	DNA binding, bending	3/844	17/18410	0.0403888	0.392923	0.36395	HMGB1/HMGB2/HMGB3	3
MF	GO:0008574	plus-end-directed microtubule motor activity	3/844	17/18410	0.0403888	0.392923	0.36395	KIF18A/KIF18B/KIF11	3
MF	GO:0035497	cAMP response element binding	3/844	17/18410	0.0403888	0.392923	0.36395	E4F1/ATF6B/CREB3L4	3
MF	GO:0016874	ligase activity	13/844	165/18410	0.0404431	0.392923	0.36395	ATP6V0C/GATB/EARS2/IARS2/MOCS3/ACSL3/LIG1/EPRS1/GMPS/TTLL13/TTLL4/PAICS/MCCC1	13
MF	GO:0016645	oxidoreductase activity, acting on the CH-NH group of donors	4/844	29/18410	0.0418931	0.392923	0.36395	PYCR2/PYCR1/PYCR3/MTHFD2	4
MF	GO:0051787	misfolded protein binding	4/844	29/18410	0.0418931	0.392923	0.36395	STUB1/DNAJB11/SDF2/SDF2L1	4
MF	GO:0008137	NADH dehydrogenase (ubiquinone) activity	5/844	42/18410	0.0419365	0.392923	0.36395	NDUFB10/NDUFB3/NDUFS1/NDUFS6/NDUFB9	5
MF	GO:0140030	modification-dependent protein binding	13/844	166/18410	0.0421235	0.392923	0.36395	BRD7/SGF29/PWP1/GLYR1/PSME4/ZFAND2B/TTLL12/CBX1/RNF168/JARID2/CDYL/YEATS4/IKBKE	13
MF	GO:0004540	ribonuclease activity	10/844	117/18410	0.0424911	0.392923	0.36395	PARN/EDC3/RPP21/EXO1/FEN1/PNPT1/RPP40/RPP25/RNASEH2A/POP1	10
MF	GO:0106310	protein serine kinase activity	24/844	360/18410	0.0431822	0.392923	0.36395	PKMYT1/PDPK1/STK16/PLK1/MAP2K3/PLK4/NEK8/NEK2/VRK2/AURKB/AURKA/BUB1B/RPS6KL1/CDK4/STK38/HASPIN/BUB1/SRPK3/RIOK1/TTK/CHEK1/NIM1K/PRKCZ/CDK1	24
MF	GO:0043021	ribonucleoprotein complex binding	12/844	150/18410	0.0432799	0.392923	0.36395	ZNF598/NOMO1/SNRPG/TACO1/ERAL1/MAIP1/EIF6/MTIF2/NME1/WDR12/EIF3C/UNG	12
MF	GO:0016667	oxidoreductase activity, acting on a sulfur group of donors	6/844	57/18410	0.0455939	0.398579	0.369189	GFER/MSRB1/TXNDC17/P4HB/SQOR/PDIA6	6
MF	GO:0050136	NADH dehydrogenase (quinone) activity	5/844	43/18410	0.0457356	0.398579	0.369189	NDUFB10/NDUFB3/NDUFS1/NDUFS6/NDUFB9	5
MF	GO:0140142	nucleocytoplasmic carrier activity	4/844	30/18410	0.0466481	0.398579	0.369189	XPO6/CSE1L/KPNA2/IPO5	4
MF	GO:0003756	protein disulfide isomerase activity	3/844	18/18410	0.0468626	0.398579	0.369189	CRELD2/P4HB/PDIA6	3
MF	GO:0004550	nucleoside diphosphate kinase activity	3/844	18/18410	0.0468626	0.398579	0.369189	NME1/NME3/NME4	3
MF	GO:0016864	intramolecular oxidoreductase activity, transposing S-S bonds	3/844	18/18410	0.0468626	0.398579	0.369189	CRELD2/P4HB/PDIA6	3
MF	GO:0016279	protein-lysine N-methyltransferase activity	6/844	58/18410	0.0489692	0.412158	0.381767	EEF2KMT/SETD1A/SMYD5/METTL22/SMYD2/ANTKMT	6
MF	GO:0030544	Hsp70 protein binding	5/844	44/18410	0.0497331	0.414271	0.383724	DNAJA3/STUB1/DNAJA2/BAX/CDK1	5

## Sheet: KEGG
ID	Description	GeneRatio	BgRatio	pvalue	p.adjust	qvalue	geneID	Count
hsa04110	Cell cycle	27/231	127/6451	2.56201e-14	5.09839e-12	4.8813e-12	9088/1387/5347/23594/990/80174/1869/701/991/51529/1019/8318/9133/890/699/891/4174/4172/5933/4085/3066/7272/64682/1111/7027/993/983	27
hsa05203	Viral carcinogenesis	20/231	204/6451	3.65297e-05	0.0036347	0.00347993	9093/7874/1387/28973/581/1388/5315/8294/85236/991/1019/148327/5902/890/8370/5933/3066/8343/1111/983	20
hsa04218	Cellular senescence	15/231	156/6451	0.000433874	0.0210357	0.02014	7249/5606/805/1869/4605/824/1019/9133/890/6237/891/5933/1111/993/983	15
hsa05012	Parkinson disease	21/231	266/6451	0.000509862	0.0210357	0.02014	4716/10131/5707/4706/581/4709/5685/5717/84790/203068/805/7922/11047/5688/4719/9377/9817/5708/10105/4726/4715	21
hsa05014	Amyotrophic lateral sclerosis	26/231	364/6451	0.000529898	0.0210357	0.02014	4716/60/5707/4706/8480/9688/1639/581/5216/4709/57122/5606/5685/5717/84790/203068/11047/5688/4719/9377/10189/5903/5708/400916/4726/4715	26
hsa04146	Peroxisome	10/231	82/6451	0.000634243	0.0210357	0.02014	3418/26063/2181/5052/25824/215/255027/11264/1962/55825	10
hsa04115	p53 signaling pathway	9/231	73/6451	0.00108997	0.0309863	0.0296668	7249/581/10572/1019/9133/891/6241/1111/983	9
hsa04714	Thermogenesis	18/231	232/6451	0.00156284	0.0388757	0.0372203	4716/64223/7249/60/4706/6603/28958/4709/5606/86/6598/2181/4719/9377/148327/4726/4715/115	18
hsa05166	Human T-cell leukemia virus 1 infection	17/231	222/6451	0.00241466	0.0533908	0.0511173	1387/581/1388/1869/701/991/51529/1019/9133/148327/5902/890/706/4085/64682/1111/115	17
hsa05016	Huntington disease	21/231	306/6451	0.00299018	0.0595046	0.0569708	4716/5707/4706/1387/1639/581/4709/5685/5717/84790/203068/11047/5688/4719/9377/5708/148327/10105/4726/4715/3066	21
hsa05020	Prion disease	19/231	273/6451	0.00402199	0.0727615	0.0696632	4716/5707/4706/581/4709/5685/5717/84790/1388/203068/11047/5688/4719/9377/5708/148327/10105/4726/4715	19
hsa05034	Alcoholism	13/231	187/6451	0.0163594	0.257448	0.246486	1388/805/8294/85236/148327/8370/8353/3066/3015/8343/136/8969/3177	13
hsa05225	Hepatocellular carcinoma	12/231	168/6451	0.01705	0.257448	0.246486	8312/60/29117/6603/581/86/6598/1869/9817/1019/2535/89780	12
hsa05010	Alzheimer disease	22/231	384/6451	0.018838	0.257448	0.246486	4716/8312/5707/4706/4709/5685/5717/84790/203068/805/7922/11047/5688/4719/9377/5708/824/10105/4726/2535/4715/89780	22
hsa05022	Pathways of neurodegeneration - multiple diseases	26/231	476/6451	0.0194056	0.257448	0.246486	4716/8312/10131/5707/4706/1639/581/4709/5606/5685/5717/84790/203068/805/11047/5688/4719/9377/342371/5708/824/10105/4726/2535/4715/89780	26
hsa03250	Viral life cycle - HIV-1	6/231	63/6451	0.0245005	0.304725	0.29175	128866/1387/7936/6827/6598/5903	6
hsa05165	Human papillomavirus infection	19/231	331/6451	0.0276085	0.323182	0.30942	8312/7249/527/1387/581/1869/5315/1019/148327/7283/890/2535/5525/5933/3066/55502/89780/9641/5590	19
hsa04520	Adherens junction	6/231	71/6451	0.0408918	0.452082	0.432832	60/1387/8826/7414/5818/6615	6

## Sheet: GSEA
ID	Description	setSize	enrichmentScore	NES	pvalue	p.adjust	qvalue	rank	leading_edge	core_enrichment
hsa05016	Huntington disease	305	0.515398	1.485	1e-10	5.63e-09	2.34e-09	13315	tags=78%, list=39%, signal=48%	55567/774/10382/4716/148327/1387/1769/4706/9586/79861/84790/2892/3798/4709/5707/9377/1639/203068/347688/3066/5688/4715/10105/10891/5708/4726/3766/4719/5435/5717/581/7277/5685/11047/170712/1213/518/1175/51807/4720/55062/1329/8678/84516/841/10376/81027/7385/4711/8218/1767/1337/27113/9519/5700/5437/6389/5432/6391/5713/5686/2904/5710/493869/10213/64764/5718/5332/10476/26100/515/4705/25942/5430/5705/4…
hsa05010	Alzheimer disease	383	0.498884	1.4457	1e-10	5.63e-09	2.34e-09	13540	tags=75%, list=39%, signal=46%	51806/22943/10382/4716/80326/489/89780/8312/11211/2535/4706/7480/79861/84790/29986/824/7922/3798/4709/7483/5707/9377/203068/347688/805/5688/4715/10105/54361/5708/4726/4719/5717/7277/5685/11047/170712/518/51807/4720/55062/1329/9451/8678/1459/23401/841/10376/81027/7385/4711/3710/5481/1337/468/5700/8326/6389/5293/6391/5713/5686/2904/5710/10213/27173/1857/487/5718/5332/10476/26100/515/4705/1649/5705/…
hsa05022	Pathways of neurodegeneration - multiple diseases	475	0.496046	1.44435	1e-10	5.63e-09	2.34e-09	13565	tags=75%, list=40%, signal=46%	51806/55567/4744/22943/10131/774/10382/4716/80326/489/89780/8312/11211/2535/1769/4706/7480/79861/84790/2892/6261/824/3798/4709/356/342371/7483/5707/9377/1639/203068/347688/805/5688/4715/10105/54361/5708/4726/4719/6300/5606/5717/581/7277/5685/11047/170712/6233/518/51807/4720/55062/1616/1329/9451/5861/8678/84516/1459/23401/841/10376/81027/7385/5879/4711/3710/5481/1767/1337/468/55669/7332/5700/8326/…
hsa05014	Amyotrophic lateral sclerosis	364	0.498368	1.44264	1e-10	5.63e-09	2.34e-09	13565	tags=76%, list=40%, signal=47%	55567/4744/10382/4716/10189/56000/400916/1769/4706/8480/79861/9688/84790/57122/3798/4709/60/5707/9377/1639/203068/347688/5688/4715/5708/4726/5216/5903/4719/6300/5606/5717/581/7277/5685/11047/71/170712/518/51807/4720/55062/1616/1329/56893/79023/9451/5861/8678/84516/10376/81027/7385/220988/5879/4711/3710/1767/1337/9631/468/5700/6389/6391/5713/5686/2521/3309/2904/5710/493869/10213/6432/10452/5718/10…
hsa05012	Parkinson disease	266	0.516917	1.48123	1.32e-10	5.95e-09	2.48e-09	13505	tags=80%, list=39%, signal=49%	51806/10131/10382/4716/4706/79861/84790/29986/7054/7922/3798/4709/5707/9377/203068/347688/805/5688/4715/10105/5708/4726/9817/4719/5717/581/7277/5685/11047/170712/6233/518/51807/4720/1616/1329/9451/10376/81027/7385/4711/3710/1337/468/55669/7332/5700/6389/6391/5713/7314/5686/3309/5710/10213/27173/5718/10476/25828/515/4705/1649/5705/4509/51465/55967/29796/1347/9167/516/5692/1965/836/5694/91860/20126…
hsa05020	Prion disease	273	0.513048	1.47095	2.03e-10	7.61e-09	3.17e-09	13750	tags=79%, list=40%, signal=48%	774/10382/4716/148327/4706/9586/79861/84790/6261/3798/4709/5707/9377/203068/347688/5688/4715/10105/1388/5708/4726/4719/6300/5717/581/7277/5685/11047/170712/518/51807/4720/1329/9451/1459/10376/81027/7385/5879/4711/3710/1337/468/5700/6389/5293/6391/5713/5686/3309/2904/5710/10213/64764/5718/5580/10476/515/4705/1649/6352/5705/653361/4509/1460/5594/55967/3312/29796/5880/1347/7124/9167/516/5595/5692/19…
hsa05203	Viral carcinogenesis	202	0.531111	1.50591	6.85e-10	2.2e-08	9.16e-09	12888	tags=76%, list=38%, signal=48%	8343/8365/85236/3135/8294/8370/8348/8970/991/148327/890/1021/8339/8341/9134/1387/9093/3017/28973/128312/7874/9586/8340/898/983/8345/1232/5933/5315/8367/8362/1111/8360/3066/6502/1019/1388/581/5902/8344/8347/85477/841/5879/5966/468/9519/5700/158983/5293/3134/10014/7529/64764/2968/3718/83933/2960/5594/5829/7534/9261/6714/5595/836/79885/3105/1739/578/7531/4893/7533/22938/6774/8517/2958/87/1108/4790/2…
hsa05169	Epstein-Barr virus infection	198	0.52756	1.49519	3.89e-09	1.09e-07	4.55e-08	10832	tags=67%, list=32%, signal=46%	3135/1869/890/1021/9134/7874/3112/9641/898/3117/3119/1870/916/864/5707/919/3066/3123/6502/915/1019/5708/6300/5606/5717/581/930/11047/1643/8819/1380/3108/841/5879/5700/3683/3280/5293/3134/5713/5710/2923/10213/9541/5718/3718/25942/5705/917/3383/7124/9020/836/3105/6885/578/9612/5702/5719/3122/22938/6774/8517/5709/811/3111/4790/3115/4615/2208/1017/9861/29110/595/3127/3133/7979/6892/54205/207/3106/729…
hsa04613	Neutrophil extracellular trap formation	184	0.528352	1.49125	1.67e-08	4.19e-07	1.74e-07	13376	tags=73%, list=39%, signal=45%	8343/8365/85236/8353/8294/820/8370/8348/8969/8357/8970/92815/8355/8336/8351/3013/8339/8341/8329/1183/85235/3017/128312/8356/8340/8345/8367/60/8362/3146/8360/3066/3012/10105/6300/8968/3015/71/8344/8347/5879/3683/158983/5293/10014/2215/5332/8520/8350/653361/83933/5594/3021/440093/5880/6714/5595/23236/79885/6885/7417/5604/3014/4790/8334/5582/94239/2811/207/23569/7416/4689/8332/4688/292/3020/6404/741…
hsa05163	Human cytomegalovirus infection	223	0.511679	1.45629	2.35e-08	5.29e-07	2.2e-07	12750	tags=72%, list=37%, signal=46%	51806/3135/1869/2786/148327/2792/1021/7249/51764/9586/1232/1978/356/1870/805/6376/1019/1388/115/6351/6300/581/59345/7852/108/841/5879/3710/468/6348/5293/3134/2923/9564/64764/115004/5332/6352/5594/5829/5880/7124/6714/5881/5595/23236/836/3105/578/4893/91860/6774/8517/811/5604/4790/10672/11214/5582/29110/595/3133/6892/54205/207/3106/1398/842/3570/111/1234/2778/8772/8717/2790/2932/1499/2784/1230/112/…
hsa04110	Cell cycle	127	0.557878	1.55155	3.52e-08	6.08e-07	2.53e-07	11579	tags=76%, list=34%, signal=50%	9088/5347/23594/1869/990/991/8318/699/9133/890/7272/1021/701/9134/1387/4085/993/4998/4172/7027/898/983/5933/80174/1870/1111/891/995/3066/9700/4174/6502/51529/1019/64682/11200/4171/51434/9184/5111/9232/9978/7529/4175/9126/10459/23595/7534/8697/7531/10926/7533/994/5885/1032/4176/1017/10393/595/4999/119504/25906/4173/7532/29945/2033/2932/5934/10274/1874/545/25847/10971/4193/1647/1871/10735/996/8881/…
hsa05415	Diabetic cardiomyopathy	203	0.513622	1.45708	3e-08	6.08e-07	2.53e-07	13505	tags=77%, list=39%, signal=47%	4716/489/4706/4709/9377/4715/10105/5590/4726/4719/6300/170712/518/4720/1329/1509/7385/5879/142/4711/1337/6389/5293/6391/5162/487/5580/5332/10476/515/4705/653361/4509/55967/29796/5880/1347/25874/488/9167/516/23236/5499/5501/7388/6513/4539/1636/4710/506/7417/514/10975/2539/2673/4790/183/2997/5582/6392/7046/4700/207/7416/4689/4513/4717/2932/6262/4694/4688/292/1339/374291/7419/5290/4538/4704/1432/533…
hsa05166	Human T-cell leukemia virus 1 infection	219	0.511432	1.45519	3.78e-08	6.08e-07	2.53e-07	12988	tags=74%, list=38%, signal=46%	3135/1869/991/148327/9133/890/701/9134/1387/4085/9586/3112/898/3117/3119/1870/916/1111/1437/8061/3123/9700/915/51529/706/1019/64682/1388/115/3932/581/5902/11200/5901/51434/9184/108/3108/468/9232/9519/6929/3683/5293/4049/3134/4488/64764/7514/3560/3718/7015/3561/115650/917/5594/3383/8697/7124/9020/5595/3105/1739/4893/3122/6513/8517/7417/598/811/5604/3111/4790/3115/2224/2005/1017/10393/2648/595/3127…
hsa05131	Shigellosis	245	0.499199	1.42586	3.78e-08	6.08e-07	2.53e-07	13890	tags=79%, list=40%, signal=47%	8353/8357/8355/8351/29108/8356/80201/824/60/7414/3059/1437/5216/6300/8968/581/3099/71/6233/10096/55062/8678/5879/3710/5481/58498/5293/11335/9978/84812/7314/9564/10398/7335/375/5580/10241/115004/5332/10097/10094/26100/8350/6352/5594/5829/10801/3021/7334/440093/10109/84335/9181/8878/55964/7124/6714/5595/23236/6885/8915/10093/8517/87/598/10616/4790/4615/113026/10092/7100/29110/9474/823/54205/382/207…
hsa05170	Human immunodeficiency virus 1 infection	210	0.50648	1.43957	1.3e-07	1.94e-06	8.1e-07	13045	tags=73%, list=38%, signal=45%	51806/3135/6923/2786/9133/2792/51764/10053/983/356/916/1111/919/891/995/805/60489/915/6300/5606/581/59345/8451/200316/5062/7852/841/5879/3710/27350/5293/3134/9978/2923/130340/1072/115004/917/5594/5829/164/5880/7124/5881/5595/836/3105/6885/578/4893/91860/8517/598/811/5604/4790/4615/5582/29110/1642/3133/164668/6892/54205/6921/207/3106/1398/842/1234/3654/140564/8772/8717/25939/2790/2784/23118/3107/2…
hsa05322	Systemic lupus erythematosus	127	0.549562	1.52842	1.44e-07	2.03e-06	8.45e-07	5926	tags=46%, list=17%, signal=39%	8343/8365/85236/8353/8294/8370/8348/8969/8357/8970/92815/3458/8355/8336/8351/3013/8339/8341/8329/6634/85235/3017/128312/8356/3112/8340/3117/8345/8367/3119/8362/717/8360/3012/3123/8968/3015/6741/8344/8347/6632/3108/158983/2904/2215/8350/3021/440093/6628/7124/940/3122/87/3111/3014/3115/8334/94239/3127
hsa05132	Salmonella infection	249	0.489006	1.39786	2.39e-07	3.17e-06	1.32e-06	13251	tags=76%, list=39%, signal=47%	10382/338382/83439/29108/79861/84790/8743/1434/3798/60/6281/113146/3320/6237/1639/203068/347688/2316/5216/6300/5606/581/7277/302/71/3326/140735/51807/10096/26084/84516/841/10376/81027/5879/58498/26263/5293/391/83658/10398/375/10097/10094/25828/5594/10109/5878/7124/840/5595/836/3840/6885/578/7184/8655/6934/10093/8517/3836/55845/26999/4074/5585/5604/10383/4790/4615/7280/10787/10092/7100/1781/197259…
hsa05152	Tuberculosis	175	0.512547	1.44396	2.73e-07	3.42e-06	1.42e-06	13722	tags=74%, list=40%, signal=45%	51806/820/50617/527/3458/64127/1387/8877/3112/3117/3329/3119/56848/805/3123/6300/581/5993/3916/1509/3108/841/4046/3593/1594/2215/3592/64170/5594/972/5878/7124/6714/5595/836/4843/8915/91860/3122/8411/3111/3313/4790/3115/4615/11151/1051/3127/4800/843/54205/207/30835/842/6772/2213/2033/3654/8772/8717/10333/3109/8767/810/1432/51135/808/5534/7421/637/3689/23365/535/2207/1385/5894/1378/7879/5603/2214/3…
hsa05034	Alcoholism	182	0.509318	1.43744	3.49e-07	4.14e-06	1.72e-06	10167	tags=58%, list=30%, signal=41%	51806/8343/8365/399694/85236/8353/8294/8370/8348/8969/8357/8970/84152/136/92815/2786/8355/8336/148327/8351/2792/3013/8339/8341/8329/85235/3017/51764/128312/8356/9586/7054/8340/8345/8367/8362/3177/8360/3066/805/3012/1388/8968/3015/8344/59345/8347/468/158983/10014/2904/64764/8520/8350/83933/5594/3021/440093/5595/79885/5499/5501/4893/91860/5604/3014/8334/2906/94239/111/2778/84254/116444/8332/2790/27…
hsa04144	Endocytosis	251	0.485405	1.3879	6.6e-07	7.42e-06	3.09e-06	13774	tags=75%, list=40%, signal=45%	2264/3135/2263/55040/274/2261/79720/5337/7037/51534/55737/10617/128866/3798/100526767/3480/5590/60682/1213/84313/1175/10096/28964/7852/8218/79643/11267/9727/51652/3134/2348/5867/3560/375/23550/10097/10094/116987/3561/9798/83737/10564/55048/1173/10109/5371/3312/5878/6714/11021/3105/9146/10093/408/116986/5119/64750/8411/3305/27243/116983/51324/10092/8766/3949/3133/378/26286/57403/7046/64411/382/885…
hsa04612	Antigen processing and presentation	69	0.611576	1.65544	7.46e-07	7.63e-06	3.18e-06	10863	tags=86%, list=32%, signal=59%	926/927/3135/3458/3805/3809/3112/3824/3117/3119/3320/3123/3326/5993/3108/925/3134/3309/2923/10197/972/3312/7124/3812/3105/3822/3122/811/3111/3305/3115/3127/4800/3133/3821/6892/3106/821/8302/3811/3109/3107/6890/3304/5721/115653/1385/5641/5720/3113/10437/6891/3804/1508/8625/4261/3308/567/3310
hsa05208	Chemical carcinogenesis - reactive oxygen species	222	0.490534	1.39575	7.45e-07	7.63e-06	3.18e-06	13612	tags=76%, list=40%, signal=46%	115019/4025/4716/5170/2944/5337/4706/1728/4709/9377/1950/4715/10105/4726/9817/4719/6300/170712/2938/518/4720/1329/7385/5879/4711/1337/6389/5293/6391/5580/10476/515/4705/653361/2940/4509/2948/5594/55967/5770/2946/29796/1347/6714/9167/516/9020/5595/4893/1836/5781/7388/4539/4710/506/8517/7417/514/23683/10975/5604/847/4790/4780/2052/6392/4700/207/57412/873/7416/4513/221357/4717/4694/253152/4688/292/1…
hsa05130	Pathogenic Escherichia coli infection	196	0.497039	1.40714	1.38e-06	1.35e-05	5.61e-06	13241	tags=73%, list=39%, signal=45%	10382/9080/4651/29108/9071/1366/79861/84790/9074/8743/4691/1365/356/60/3059/203068/347688/7430/6300/581/7277/9368/71/51807/10096/5062/4627/5861/841/10376/81027/5879/23562/5777/375/10097/10094/4643/5594/10458/10972/10109/9181/7124/8440/6714/840/5595/836/6885/578/10093/5781/2147/8517/9170/55845/26999/10383/4790/4615/10672/7082/7280/10787/1364/10092/7100/4641/54205/382/842/57180/9265/3654/8772/10095…
hsa05165	Human papillomavirus infection	331	0.456032	1.31616	2.01e-06	1.89e-05	7.85e-06	12328	tags=60%, list=36%, signal=39%	5522/1299/3135/55502/1869/80326/50617/527/89780/8312/3918/148327/11211/2535/3914/8515/890/1021/10319/9134/83439/1387/7249/7480/3691/9586/9641/898/5933/5315/1978/356/7483/3066/5525/1950/54361/7283/1019/5590/3655/581/9368/534/90423/841/9519/5700/8326/3280/5293/3134/10474/64764/1857/7015/7476/4853/148022/5594/3695/5829/3993/7124/528/57801/5595/836/1284/3105/1739/578/6934/4893/3915/8517/8324/5527/271…
hsa05164	Influenza A	168	0.501915	1.41257	2.15e-06	1.93e-05	8.06e-06	12291	tags=65%, list=36%, signal=42%	3458/7113/1021/56000/1387/29108/8480/8743/3112/9641/56649/3117/356/60/3119/3838/3123/64499/1019/23430/581/71/5611/3108/841/5293/3593/7514/10241/3592/6352/148022/5594/4928/3383/5371/7124/5595/1965/836/578/7706/642843/3122/8517/3836/5604/3111/4790/3115/4615/2224/29110/8766/3127/103/54205/207/7297/842/6772/2033/7416/8772/8717/8106/292/3109/4600/5290/51135/637/114548/9230/355/3627/5894/5579/3661/4793…
hsa04650	Natural killer cell mediated cytotoxicity	124	0.527654	1.46672	3.04e-06	2.63e-05	1.1e-05	10713	tags=62%, list=31%, signal=43%	399694/3135/3458/79465/3809/8743/4277/3384/3824/5551/356/135250/919/1437/80328/51744/3932/353091/3002/7535/5879/9437/4068/3683/5293/5777/2215/80329/27040/5594/3383/5880/7124/5881/5595/836/22914/3812/3105/3822/4893/5781/5604/10870/5582/3133/3821/3106/3811/3107/5290/6464/5534/637/3689/100507436/115653/2207/355/5894/5579/7305/7410/962/2885/2214/4773/7409/3804/6850/369/8503/259197/5605/5532/6654/3459
hsa05418	Fluid shear stress and atherosclerosis	137	0.513802	1.43377	3.97e-06	3.31e-05	1.38e-05	13171	tags=75%, list=38%, signal=46%	51806/3458/2944/658/2817/1728/7341/60/3320/805/5590/9817/6300/71/3326/2938/5879/5293/2950/25828/653361/2940/2948/3383/2946/9181/5155/5880/8878/4205/7124/6382/6714/5881/59341/6885/5562/7184/91860/8517/4790/4780/5154/1906/207/652/221357/51588/1499/4688/5598/810/5290/4217/1432/808/3162/6612/6613/4258/7295/659/5603/3674/4846/6385/5608/5599/3791/5970/90/5607/2947/801/445/1147/8503/5747/3552/93/5601/15…
hsa04714	Thermogenesis	232	0.482368	1.37516	5.98e-06	4.81e-05	2e-05	13505	tags=75%, list=39%, signal=46%	4716/64223/148327/656/2181/53632/7249/86/4706/9586/26291/6603/4709/60/28958/9377/55811/4715/10891/115/4726/6598/4719/6300/5606/71/170712/518/4720/1329/108/7385/4711/55818/1337/6389/6391/65260/64764/10476/515/4705/4509/137682/55967/388753/84335/29796/1347/9167/516/5562/4893/7388/4539/4710/506/514/10975/6392/4700/284184/8110/55471/1352/111/6605/2778/4513/4717/6597/112/4694/57521/5571/1339/374291/42…
hsa04218	Cellular senescence	156	0.508882	1.42898	7.71e-06	5.98e-05	2.49e-05	13898	tags=76%, list=41%, signal=46%	51806/4605/3135/1869/3805/9133/890/1021/9134/7249/993/824/898/983/5933/1978/1870/1111/2305/891/6237/805/1019/6300/5606/11200/3710/5481/5293/3134/5594/5810/9261/8878/5595/22800/3105/5499/59341/5501/91750/4893/91860/22808/7417/5604/4790/286826/1017/595/3133/10758/823/7046/207/3106/7416/5934/292/3107/90550/5883/7419/810/5290/1432/1874/808/545/5534/204851/4193/3708/1647/5500/5894/1871/132660/4683/677…
hsa04062	Chemokine signaling pathway	190	0.484408	1.36932	9.66e-06	7.24e-05	3.02e-05	13831	tags=72%, list=40%, signal=43%	399694/2786/643/4283/2792/10563/51764/2833/6374/1232/6355/6375/56477/6376/5590/115/6351/59345/6846/7852/108/5879/6348/6367/5293/9564/5580/3718/5332/729230/6352/653361/6354/5594/6373/5829/5880/6714/5881/5595/23236/4893/408/6774/8517/5604/4790/58191/10663/2829/6368/207/1398/6772/111/1234/2919/2790/2932/1236/2784/1230/57580/112/2826/2870/2773/5908/5290/2787/2783/2793/5330/3702/6464/7454/1399/3627/58…
hsa04668	TNF signaling pathway	114	0.525432	1.45413	1.17e-05	8.52e-05	3.55e-05	12017	tags=71%, list=35%, signal=46%	4314/148327/64127/9586/6374/1437/6376/1388/6300/5606/841/8986/468/5293/4049/64764/6352/83737/5594/3383/7124/9020/840/5595/836/6885/8517/5604/4790/1051/197259/1906/843/1540/207/8772/8717/192111/2919/8837/23118/602/5290/4217/1432/7133/7186/8737/1385/355/331/3627/5743/90993/7188/329/5603/3659/5608/7187/5599/10454/10059/5970/7185/3569/10488/1147/8503/7128/1386/5601/11035/9530/5609/330/84699/5296/1435…
hsa04145	Phagosome	147	0.499112	1.39731	1.35e-05	9.52e-05	3.97e-05	13610	tags=74%, list=40%, signal=45%	3135/10382/50617/527/338382/78989/7037/79861/84790/3112/3117/60/3119/203068/347688/3123/7277/71/51807/534/3916/90423/3108/10376/81027/5879/3134/2215/653361/5878/528/3105/9146/3122/9341/4074/811/10383/8411/3111/3115/23480/10952/11151/7280/51382/1781/3127/529/3133/1311/3106/30835/51143/2213/821/4689/347733/29927/84617/1778/4688/245973/10333/3109/3107/6890/3693/3689/8685/525/535/1783/9296/3678/9554/…
hsa05416	Viral myocarditis	56	0.607588	1.61843	1.44e-05	9.84e-05	4.1e-05	9601	tags=71%, list=28%, signal=52%	3135/3112/3117/5551/60/3119/3123/71/1981/3108/841/5879/3683/3134/1604/3383/5880/1605/5881/836/3105/940/3122/3111/3115/595/3127/3133/54205/3106/1982/842/3109/3107/637/3689/4625/958/3113/27
hsa05167	Kaposi sarcoma-associated herpesvirus infection	194	0.482327	1.36499	1.61e-05	0.00010626	4.42e-05	13612	tags=69%, list=40%, signal=42%	51806/3135/1869/2786/2792/1021/83439/1387/51764/4277/9641/1232/1870/1437/805/1019/6300/581/6233/59345/8678/841/5879/3710/5293/3134/7314/148022/5594/9261/3383/5155/6714/5595/836/3105/578/6934/4893/91860/6774/8517/5604/4790/29110/595/3133/54205/207/3106/7297/64422/842/6772/1234/2033/8772/8717/2919/2790/2932/1499/2784/1230/57580/9976/3107/810/5290/2787/2783/1432/2793/808/5534/3091/637/7316/7186/1005…
hsa04066	HIF-1 signaling pathway	109	0.518787	1.43212	2.78e-05	0.000178621	7.44e-05	13612	tags=74%, list=40%, signal=45%	7018/6923/3458/1387/226/7037/80201/1978/3480/5209/1950/3099/9470/2023/5214/5293/9978/5162/2026/5594/5595/4843/5211/112399/6513/6774/2872/8453/54583/253314/5604/4790/5582/5230/1906/2064/3939/284/6921/230/207/3570/2033/5213/5290/405/6199/3162/3091/2056/2597/3643/6198/5579/2027/4846/5970/7428/3569/2475/5160/3098/8503/5605/3459/229/1027/3945/5296/818/5232/1977/3101/4055/5291/817/92483/8569/1536/5335/…
hsa05417	Lipid and atherosclerosis	214	0.470414	1.33805	3.23e-05	0.000201704	8.4e-05	13831	tags=66%, list=40%, signal=40%	51806/4312/4314/5170/25833/29108/8743/9641/3329/356/3320/805/6300/5606/581/3326/9451/841/5879/468/6348/5293/3593/3309/30001/5332/3592/1649/6352/653361/148022/5594/3383/3312/7124/6714/840/5595/23236/1965/836/6257/6885/7184/4893/91860/6774/8517/598/2081/4790/3305/4615/4780/29110/3949/54205/22926/207/842/5452/3654/4689/2919/2932/4688/5451/23118/10333/5908/810/5290/4217/3304/1432/51135/5330/808/5534/…
hsa04217	Necroptosis	157	0.49261	1.38334	3.4e-05	0.000206492	8.6e-05	14015	tags=69%, list=41%, signal=41%	8969/92815/3458/8336/3013/8329/29108/85235/8743/5321/824/128866/100526767/356/3146/3320/3012/581/3015/3326/5836/9825/27005/841/142/81030/5481/79643/51652/5834/3718/148022/5478/123745/8878/7124/6775/11124/9131/6774/7417/5119/2747/10616/3014/27243/8334/197259/94239/823/1540/7297/6772/7416/8772/8717/192111/2495/8332/8837/292/2512/7419/51510/637/7186/114548/8737/355/331/6777/7188/8335/255189/329/5713…
hsa04932	Non-alcoholic fatty liver disease	155	0.48984	1.37534	3.73e-05	0.000220997	9.2e-05	13722	tags=77%, list=40%, signal=47%	4716/53632/4706/4709/356/9377/4715/4726/4719/6300/581/170712/22877/4720/1329/9451/841/7385/5879/4711/1337/468/6389/5293/6391/4705/1649/83737/55967/29796/1347/7124/9167/840/1965/836/6945/6720/5562/7388/4710/10975/2081/4790/6392/51094/54205/4700/207/3570/4513/4717/2932/4694/4296/5571/1339/374291/5290/4217/4704/1432/440567/637/3643/7386/7186/7381/4731/4712/4697/4722/7384/1327/355/4512/4723/1345/2708…
hsa05135	Yersinia infection	136	0.501949	1.40028	4.57e-05	0.0002639	0.000109881	13655	tags=78%, list=40%, signal=47%	926/927/29108/60/3932/6300/5606/71/10096/8935/7535/5879/925/5293/391/9564/27040/10097/10094/148022/5594/10458/5829/10109/5880/7124/6714/5881/5595/6885/10093/8517/5585/5604/4790/4615/10092/29110/4210/382/207/1398/57180/3654/10095/2932/8394/23118/147179/5290/1432/51135/7454/23365/7186/114548/1399/3678/3661/81873/7410/5603/4773/5608/3984/63916/7409/5599/10454/5970/3569/23396/1147/6093/4775/8503/3606…
hsa05145	Toxoplasmosis	109	0.513099	1.41642	5.7e-05	0.000320444	0.000133425	12909	tags=73%, list=38%, signal=46%	5170/3458/3918/3914/10319/3112/3117/3119/3123/10105/3655/6300/5606/3108/841/3593/345611/3592/5594/3312/7124/5595/836/4843/6885/3915/3122/6774/8517/598/3111/4790/3305/3115/4615/3127/3949/54205/207/7297/842/6772/1234/3654/3911/23118/3109/2773/3304/1432/51135/331/2771/4793/329/958/5603/5608/3113/5599/10454/5970/4261/1147/3688/3459/5601/3310/3909/3586/330/3588/23533/23643/7132/3587/5600/572/7189/1468…
hsa04611	Platelet activation	124	0.500964	1.39253	7.16e-05	0.000393104	0.000163679	13869	tags=73%, list=40%, signal=43%	91807/5321/60/8673/5590/115/6300/71/108/3710/5293/5332/7408/5594/123745/6714/340156/84876/5595/23236/5499/5501/51206/2147/10672/2811/207/111/2778/2814/112/2909/2773/5908/5290/1432/5330/5023/5584/23365/8773/83706/6915/4659/2207/3708/5500/2771/255189/5603/3674/4846/10125/5739/6850/10627/6786/4638/5028/103910/5331/6093/113/8503/3688/387/85366/109/2266/9475/5742/9138/3673/7094/23533/5296/9002/3937/56…
hsa04210	Apoptosis	136	0.495209	1.38148	8.18e-05	0.000438133	0.000182427	13797	tags=75%, list=40%, signal=45%	332/5170/79861/84790/8743/824/5551/356/60/84823/10039/581/7277/597/4001/71/51807/1515/1616/9451/1509/841/3002/10376/142/3710/468/27113/5293/1649/5594/7124/9020/840/5595/1965/836/578/4893/9131/8517/598/5604/2081/4790/5783/4000/843/823/54205/207/842/1522/1521/8772/8717/8837/10038/5290/4217/637/56616/143/7186/27429/55367/8737/355/331/3708/1647/5894/329/5599/5970/1508/7185/6709/1147/1439/8503/5605/56…
hsa05330	Allograft rejection	34	0.633794	1.62442	8.48e-05	0.000443738	0.000184761	9396	tags=79%, list=27%, signal=58%	3135/3458/3112/3117/5551/356/3119/3123/3108/3002/3134/3593/3592/7124/3105/940/3122/3111/3115/3127/3133/3106/3109/3107/355/958/3113
hsa05332	Graft-versus-host disease	37	0.624559	1.6144	9.93e-05	0.000507788	0.00021143	9913	tags=84%, list=29%, signal=60%	3135/3458/3112/3824/3117/5551/356/3119/3123/3108/3002/3134/7124/3812/3105/940/3122/3111/3115/3127/3133/3821/3106/3811/3109/3107/115653/355/3113/3804/3569
hsa04142	Lysosome	132	0.496384	1.38328	0.000119033	0.000595163	0.000247811	15805	tags=87%, list=46%, signal=47%	50617/527/10053/51172/23457/1201/84572/2629/2519/1213/1515/3916/1509/1510/4669/8218/285362/4668/130340/9516/55353/2588/164/2548/4758/4074/26985/5476/2760/968/1522/1521/1777/23659/8943/23163/8763/23062/1212/26088/9374/10239/1176/8692/20/53/535/2720/162/5641/23431/26503/410/1211/22901/9741/175/8546/1200/10717/411/7805/1508/967/3482/9114/2581/256471/6609/11154/1512/23553/1497/537/23545/5660/8907/837…
hsa04071	Sphingolipid signaling pathway	120	0.496774	1.37755	0.000139438	0.000682032	0.000283981	13495	tags=72%, list=39%, signal=44%	5522/53637/5170/5337/8877/56848/5525/8560/56624/5590/6300/581/3827/1509/134/5879/5293/5332/5594/5880/7124/5881/5595/23236/4893/6610/5527/5604/4790/10672/5582/207/29956/5528/8717/259230/4363/2773/5290/4217/1432/5330/8698/637/7186/2207/5519/2768/5894/2771/5579/5518/5603/5515/4846/5599/9517/5970/10715/5529/55844/5331/6093/8503/6609/5605/5601/387/4985/10558/79603/9475/5296/7132/91012/5523/624/9294/55…
hsa04623	Cytosolic DNA-sensing pathway	74	0.541306	1.47268	0.000196315	0.000939805	0.00039131	12504	tags=69%, list=36%, signal=44%	51728/29108/9641/6351/5435/841/81030/5437/84265/51082/115004/6352/55718/840/5434/836/8517/4790/5440/29110/197259/103/4210/5441/1777/8772/25939/9533/9447/10623/79792/114548/8737/3627/3661/11128/4793/10622/57506/55703/5970/3569/340061/1147/3606/10621/11035/1687/661/834/171568
hsa05017	Spinocerebellar ataxia	142	0.484066	1.35231	0.000200653	0.000940561	0.000391626	13291	tags=71%, list=39%, signal=44%	489/2892/6261/4976/342371/5707/146227/5688/10105/5708/5717/5685/11047/55062/8678/3710/9519/5700/5293/5713/5686/2904/5710/10213/487/5718/5332/56652/26100/5705/60673/10528/488/5692/23236/5694/5702/5719/7417/5691/11273/5709/6712/2081/5683/9861/5582/2906/5715/4800/7979/54205/5689/207/30849/10939/5693/7416/116444/25814/5687/292/90550/7419/5290/4217/5330/7186/4287/8408/3708/10524/5579/5682/3516/5706/55…
hsa04621	NOD-like receptor signaling pathway	183	0.459871	1.29808	0.000211989	0.00097342	0.000405307	14092	tags=67%, list=41%, signal=40%	199713/260434/820/115362/64127/2635/29108/9641/7226/3320/115361/6300/3326/841/84674/3710/55669/2633/345611/5580/5332/25828/64170/6352/148022/5594/79184/7124/5595/23236/22861/6885/7531/8517/7417/598/5585/10616/4790/4615/2634/56919/29110/9474/4210/7297/6772/7416/8772/2919/55054/23118/9447/8767/90550/7419/1432/51135/5330/838/63940/79792/91662/7186/114548/8737/331/3708/7295/7188/3661/4793/329/5603/90…
hsa05222	Small cell lung cancer	92	0.512487	1.40711	0.000230127	0.00103537	0.000431102	11851	tags=66%, list=35%, signal=44%	1869/3918/1163/3914/1021/10319/9134/898/1870/9618/5915/6502/1019/3655/581/1643/1164/5293/836/1284/6257/4843/578/3915/8517/598/4790/1017/595/54205/207/842/1286/3911/5290/7186/331/1647/5743/1871/7188/1285/329/3674/7187/7709/5970/7185/1147/8503/5747/3688/1027/1282/5925/3909/3673/317/3685/330/5296
hsa04015	Rap1 signaling pathway	210	0.458377	1.30284	0.000234684	0.00103537	0.000431102	14801	tags=72%, list=43%, signal=41%	23566/51806/2264/2263/136/4804/2261/1944/26291/60/8631/1943/6237/3480/805/1950/5590/115/5216/6300/5606/71/5909/108/1945/5879/1969/3683/5293/2904/9564/27040/5332/7408/55740/5594/25780/5155/5880/5228/6714/5881/5595/23236/4893/91860/22808/9170/23683/999/5604/1946/260425/9771/5154/5582/1942/284/64411/207/1398/111/2778/57121/1499/5898/112/2773/5908/810/5290/5899/4254/1432/5330/808/5584/3643/3689/1399/…
hsa05215	Prostate cancer	97	0.5153	1.41624	0.000284809	0.0012091	0.000503437	11851	tags=65%, list=35%, signal=43%	2263/4314/1869/5170/7113/148327/9134/83439/1387/9586/898/1870/3320/7039/3480/1950/3326/468/5293/2950/64764/6692/5594/5155/5595/7184/6934/4893/8517/5604/4790/1017/5154/595/2064/207/842/2033/2932/1499/5290/4193/1385/90993/5894/1871/2885/5328/5970/369/2475/10488/1147/8503/5605/6654/1027/5156/6932/5925/5327/84699/5296
hsa04810	Regulation of actin cytoskeleton	228	0.449493	1.28013	0.000284809	0.0012091	0.000503437	13800	tags=68%, list=40%, signal=41%	2264/2263/91807/8515/2261/3691/26291/81624/60/7414/8826/6237/128239/7430/1950/50649/5216/3655/71/3827/10096/28964/5062/7852/4627/85477/5879/623/58498/3683/5293/9564/10398/1072/55740/10097/10094/5594/10458/3695/5829/10109/5155/5880/6714/340156/5881/5595/22800/5499/5501/4893/1128/10093/2147/22808/9170/79837/1131/55845/87/26999/5604/7114/10672/10787/5154/10092/5962/207/1398/57180/1132/10095/5305/571…
hsa04940	Type I diabetes mellitus	40	0.605142	1.5727	0.000300582	0.00125242	0.000521477	7266	tags=65%, list=21%, signal=51%	3135/3458/3112/3117/3329/5551/356/3119/3123/3108/3002/4049/3134/3593/3592/7124/3105/940/3122/3111/3115/3127/3133/3106/3109/3107
hsa05161	Hepatitis B	162	0.47005	1.32191	0.000339492	0.00138883	0.000578273	13548	tags=67%, list=39%, signal=41%	332/1869/148327/890/9134/1387/6554/9586/9641/898/356/1870/1388/6300/5606/581/1643/5111/841/468/5293/7529/64764/3718/148022/5594/7534/7124/6714/6775/5595/836/6885/4893/6774/8517/5604/4790/4615/1017/5582/29110/1642/843/54205/7046/207/7297/842/6772/2033/3654/8772/23118/7419/5290/1432/51135/10971/637/1385/355/90993/5894/1871/6777/5579/3661/2885/5603/4773/5608/57506/7187/5599/10454/6776/5970/3569/369/…
hsa05160	Hepatitis C	157	0.472033	1.32556	0.000366833	0.00147388	0.000613687	12888	tags=62%, list=38%, signal=39%	5522/1869/9080/3458/1021/9071/1366/9074/9641/1365/356/1870/1950/1019/581/9451/841/23562/5293/27102/7529/10197/148022/5594/7534/7124/5595/1965/836/578/7531/4893/7533/6774/8517/5604/4790/1017/440275/1364/29110/595/3949/54205/207/7297/842/6772/7532/8772/3646/8717/2932/1499/8837/4600/5290/9075/10971/637/7186/8737/5519/355/3627/5894/1871/3661/2885/5518/8554/5515/57506/7187/10062/5970/6041/55844/369/49…
hsa04150	mTOR signaling pathway	155	0.470316	1.32052	0.000389617	0.00153796	0.000640368	12551	tags=66%, list=37%, signal=42%	54541/80326/64223/9894/5170/89780/11211/2535/84219/8131/7249/7480/1978/7483/8140/3480/6502/54361/79899/64798/534/9470/90423/9675/8326/5293/1857/7476/5594/84335/7124/528/5595/5562/4893/8324/28956/253314/5604/6520/51382/5582/6249/529/8323/6396/652968/207/1856/2932/7473/153129/245973/57521/5290/6199/81929/3643/8408/525/1975/51719/9296/5894/54468/6198/5579/6794/7855/10641/2885/10542/220441/64900/7471…
hsa04625	C-type lectin receptor signaling pathway	104	0.50569	1.39389	0.000403288	0.00156448	0.000651409	13540	tags=76%, list=39%, signal=46%	51806/29108/9641/6237/805/6300/841/3710/6367/4046/5293/3593/5580/3592/64170/5594/9261/7124/6714/9020/5595/22800/8915/4893/91860/5781/8517/22808/53342/4790/1540/207/30835/6772/4791/602/810/5290/1432/808/5971/5534/23365/114548/2207/4193/3708/5743/5894/5603/3659/4773/5599/5970/6850/3569/801/1147/4775/8503/93978/5532/5601/26253/387/3586/5058/5296/834/5600/8844/163688/64581/5291/51561/868/3845/10332/5…
hsa05235	PD-L1 expression and PD-1 checkpoint pathway in cancer	89	0.50432	1.38287	0.000462527	0.00173448	0.000722192	13540	tags=74%, list=39%, signal=45%	3458/5133/27436/916/919/1950/915/3932/6300/5606/1459/7535/5293/5777/27040/917/1460/148022/5594/5595/940/4893/116071/5781/6774/8517/5604/4790/4615/207/6772/10538/5290/1432/6199/5534/1457/3091/5894/6198/4793/5603/4773/5608/10125/29126/5970/55509/2475/1147/4775/8503/5605/5532/3459/920/4794/5296/283106/114609/5600/7189/5291/3845/5335/5530
hsa05162	Measles	139	0.475313	1.32694	0.00045797	0.00173448	0.000722192	12888	tags=65%, list=38%, signal=41%	7161/1021/9134/9641/898/356/916/915/1019/581/9451/1459/841/27113/5293/27102/3593/3560/3718/3592/3561/4179/917/1460/3312/8667/1965/836/6885/578/940/6774/8517/598/4790/3305/4615/1017/440275/29110/595/103/54205/207/7297/30835/842/6772/2213/3654/8772/8717/2932/6504/23118/4600/5290/3304/51135/1457/637/355/6777/3661/4793/894/57506/7187/5599/6776/5970/3569/1147/4478/8503/4939/3552/7128/64135/5601/3310/1…
hsa05142	Chagas disease	101	0.510488	1.40784	0.000618225	0.00224356	0.00093416	12988	tags=69%, list=38%, signal=43%	5522/3458/356/916/919/915/6300/3827/841/6348/5293/3593/5332/3592/6352/917/148022/5594/7124/5595/23236/4843/2769/1636/8517/811/4790/4615/7046/207/2778/3654/8772/712/8837/10333/2773/5290/1432/51135/5330/5519/355/2771/5518/5603/5515/5599/5970/3569/55844/714/713/1147/5331/8503/3459/2767/5601/3586/718/5296/6347/7132/4087/624/5600/7189/5291/6416
hsa04666	Fc gamma R-mediated phagocytosis	96	0.50723	1.39334	0.000609066	0.00224356	0.00093416	13798	tags=74%, list=40%, signal=44%	4651/274/5337/8877/5321/56848/10096/85477/5879/5293/1072/2215/5580/27040/7408/10097/10094/8612/653361/5594/123745/10109/5880/5595/8398/10093/5604/10092/5582/382/207/8853/1398/57180/2213/10095/8394/5290/6199/4082/7454/1785/1399/5894/6198/5579/81873/7410/3985/255189/50807/2214/3984/7409/6850/23396/8503/5788/5058/2209/5296/65108/100137049/8936/5291/10552/5338/1793/5335/10163/3055
hsa01524	Platinum drug resistance	72	0.537718	1.45873	0.000646347	0.00227231	0.000946133	13171	tags=76%, list=38%, signal=47%	332/5170/2944/356/7153/581/2938/841/27113/5293/2950/2940/2948/5594/2946/5595/836/2956/1244/4436/578/598/5429/2064/54205/207/842/4292/672/8772/221357/5290/4217/637/4193/355/331/4258/7155/329/1317/2947/8503/2941/4259/317/330/5296/9446/2067/5980/572/5291/472/2953
hsa04658	Th1 and Th2 cell differentiation	89	0.499542	1.36977	0.000645701	0.00227231	0.000946133	10832	tags=65%, list=32%, signal=45%	3458/3112/3117/3119/916/864/919/3123/915/3932/6300/30009/3108/7535/3593/3560/27040/3718/3592/3561/917/4853/5594/6775/5595/3122/8517/3566/3111/4790/3115/3127/7297/6772/3594/3714/3595/3109/1432/5534/4851/6777/3516/4793/5603/4773/3113/5599/6776/5970/28514/1147/84441/11317/4775/5532/3459/5601
hsa04010	MAPK signaling pathway	294	0.432656	1.24523	0.000673178	0.00233023	0.000970248	15347	tags=70%, list=45%, signal=39%	2264/1852/2263/774/4804/2261/23162/1944/26291/5321/5923/356/1943/6237/7039/3480/1950/2316/6300/5606/4909/1616/5062/8986/1945/5879/59283/468/1969/3315/5871/9448/1649/5594/25780/123745/9261/3312/5155/5880/5228/7124/5881/2323/9020/5595/836/27092/22800/1845/6885/4893/408/2872/8517/22808/994/5604/51776/5536/3925/4790/3305/1946/4615/5778/2005/5154/51347/5582/9344/57551/2064/1942/284/7046/207/1847/1398/…
hsa05202	Transcriptional misregulation in cancer	190	0.450319	1.27296	0.000810559	0.00276327	0.00115055	11921	tags=56%, list=35%, signal=37%	3195/3207/8842/8353/4314/8357/8938/8355/6495/7113/8351/6756/890/4804/3206/8356/2892/26471/3728/85414/3480/1437/3066/8968/581/597/1643/3002/4291/5966/6929/5079/2521/5546/79058/8148/3560/6692/8350/1649/25942/8864/3695/3021/440093/5371/7849/6257/578/598/2130/4790/904/2005/1051/5154/3205/7468/1655/4221/3020/84444/2118/2120/8861/51513/4193/1647/1848/860/329/958/894/8464/3087/5328/9611/5081/7709/5090/5…
hsa05340	Primary immunodeficiency	37	0.587335	1.51819	0.000907587	0.00304786	0.00126905	11651	tags=78%, list=34%, signal=52%	926/927/23495/973/916/915/100/3932/930/7374/29851/5993/7535/925/3718/3561/115650/84876/8517/6890/958/5896/29760/6891/8625/4261/64421/920/5788
hsa04962	Vasopressin-regulated water reabsorption	44	0.570479	1.49451	0.00104634	0.00341198	0.00142066	8498	tags=61%, list=25%, signal=46%	398/360/359/148327/9586/1639/115/140735/84516/64764/4905/396/5878/397/6810/8655/1781/8766/51143/2778/1778/112/10540/9230/1385/1783/90993
hsa04934	Cushing syndrome	155	0.460936	1.29419	0.00104007	0.00341198	0.00142066	11894	tags=59%, list=35%, signal=39%	1869/80326/2516/89780/8312/148327/11211/2535/1021/9134/83439/7480/9586/5151/898/1870/3777/7483/54361/1019/1388/115/108/3710/468/8326/79798/64764/5929/2271/1857/5332/7476/5594/84876/5595/23236/6934/8324/5604/183/1017/595/8323/3949/51655/9049/11091/111/1856/2778/4221/2932/1499/112/7473/2773/5908/9101/54554/5330/405/1385/3708/90993/1871/2771/7855/1586/8085/7471/9070/1589/1855/10488/5331/10297/113/79…
hsa05171	Coronavirus disease - COVID-19	231	0.438392	1.24903	0.00127937	0.00411227	0.00171224	13854	tags=65%, list=40%, signal=39%	4312/6123/4314/6187/7113/9641/717/1437/6300/200916/6233/100529097/5293/3593/6189/115004/3592/6210/5594/6176/6168/6165/7124/5595/6147/6885/2147/6774/1636/8517/6124/6166/629/4790/4615/3921/5582/6204/6129/29110/6227/51121/103/6206/6155/6231/7297/6143/6772/3570/6868/3654/6146/6181/712/6205/6144/23118/51187/4600/5290/1432/733/51135/6156/6158/9349/6232/6175/6229/100529239/6218/114548/6235/6171/3627/235…
hsa05140	Leishmaniasis	72	0.526692	1.42882	0.00142806	0.00451576	0.00188025	13376	tags=79%, list=39%, signal=48%	3458/3112/3117/3119/3123/6300/3108/3593/5777/2215/3592/653361/5594/7124/5595/4843/6885/3122/1915/3111/4790/3115/4615/3127/6772/3654/4689/4688/23118/3109/1432/51135/3689/5743/5579/1378/4793/5603/2214/3113/10454/5970/3552/3688/3459/1535/3586/718/2209/3684/1379/65108/5600/2002/7189/7042/1536
hsa04140	Autophagy - animal	141	0.465451	1.29929	0.00144504	0.00451576	0.00188025	13915	tags=72%, list=41%, signal=43%	54541/64223/5170/338382/7249/8673/3146/6237/3480/64798/55062/9451/5861/3916/8678/1509/58476/5293/5580/26100/79065/5594/1613/60673/84335/8878/140775/5595/1965/22800/6885/5562/4893/9110/22808/598/9342/5604/2081/440275/29110/9474/207/30849/64422/55578/55054/8837/57521/23192/5290/84971/6199/9711/3091/8408/10645/3708/5894/64419/10533/6198/6794/7879/5515/5599/84938/1508/2475/58528/8503/7248/5605/55626/…
hsa04672	Intestinal immune network for IgA production	45	0.558553	1.46645	0.0016945	0.00522278	0.00217463	9913	tags=67%, list=29%, signal=47%	5284/23495/3112/3117/8174/3119/102723996/3123/608/56477/29851/23308/7852/3108/115650/3695/9020/940/3122/3111/3115/10673/3127/2826/3109/3601/8741/958/3113/3569
hsa05133	Pertussis	76	0.506034	1.37972	0.00172116	0.00523326	0.002179	13455	tags=76%, list=39%, signal=46%	51806/725/29108/6374/717/805/6300/3593/1072/3592/148022/5594/7124/840/5595/836/4843/91860/4790/4615/3654/712/2773/810/1432/51135/808/3689/114548/3678/2771/3661/5603/3659/5599/5970/3569/801/714/713/3552/3688/5601/387/716/3586/718/23643/929/3684/834/114609/5600/163688/7189/710/51561/10392
hsa04310	Wnt signaling pathway	169	0.452473	1.27365	0.00197942	0.00593826	0.00247254	13890	tags=66%, list=40%, signal=40%	6422/59352/22943/80326/89780/8312/11211/2535/6425/83439/1387/7480/147111/7483/8061/54361/57216/1459/23401/5879/11197/284654/8326/50964/9978/27101/59343/1857/5332/79718/2239/1460/7476/23500/144165/5880/5881/23236/166336/6477/81839/6885/6934/79816/8324/5467/5582/80319/595/1488/27121/25776/8323/1856/2033/2932/1499/7473/51701/5663/6259/5330/5534/1457/25805/440193/5579/7855/85407/4773/894/7471/5599/86…
hsa04530	Tight junction	169	0.451987	1.27228	0.00201642	0.00596965	0.00248561	13831	tags=67%, list=40%, signal=40%	5522/9080/27134/53632/9071/1366/79861/84790/9074/50848/1365/91862/60/3059/7430/1019/5590/7277/9368/71/51807/10096/4627/84952/5111/10376/5879/23562/154810/10398/7408/10097/10094/10109/9181/3993/6714/4771/5562/1739/4637/10093/87/55114/7082/1364/10092/595/5872/2064/5962/93643/57180/3996/10095/8189/123720/5571/4217/64398/5584/9075/7454/11149/150084/81/140465/5519/6794/56288/81873/5518/5515/92359/1741…
hsa05212	Pancreatic cancer	76	0.502738	1.37073	0.00205341	0.00600023	0.00249834	13722	tags=75%, list=40%, signal=45%	1869/675/1021/5888/5337/1870/7039/1950/1019/581/1643/5879/5293/5594/5880/5881/5595/578/6774/8517/598/10928/5604/4790/595/2064/7046/207/842/6772/5898/5290/5899/6199/1647/5894/1871/6198/5599/5970/369/2475/1147/8503/5601/5925/9459/5296/4087/572/5291/7042/5338/4616/3845/7422/7040
hsa04064	NF-kappa B signaling pathway	102	0.480768	1.32534	0.0022014	0.0063502	0.00264406	13637	tags=72%, list=40%, signal=43%	7329/29775/8740/6351/3932/597/1459/7535/142/4049/27040/115650/1460/148022/3383/7124/9020/84433/6885/7706/8915/8517/598/4790/4615/10673/1540/3654/79092/8717/51588/2919/4791/8837/23118/51135/5971/1457/128178/7186/55367/8737/331/1647/5743/7188/5579/329/958/29760/7187/10454/5328/4050/5970/6850/7185/1147/7128/330/23643/929/7132/283106/114609/6387/7189/4055/472/4616/5335/695/9560
hsa05225	Hepatocellular carcinoma	167	0.452795	1.27467	0.0022754	0.00648057	0.00269834	13501	tags=66%, list=39%, signal=40%	399694/1869/80326/89780/8312/11211/2535/2944/1021/83439/86/1728/7480/29117/6603/60/1870/7483/7039/3480/54361/1019/9817/6598/581/1643/71/2938/23401/8326/5293/2950/1857/7015/2940/2948/7476/5594/2946/196528/5595/578/6934/4893/8324/598/5604/4780/5582/595/8323/114112/7046/207/8110/6605/1856/221357/2932/1499/6597/7473/5290/6464/6199/3162/1647/4258/5894/1871/6198/5579/10587/7855/2885/6602/7471/1855/2947…
hsa04370	VEGF signaling pathway	59	0.519251	1.39118	0.00324382	0.00909538	0.00378708	13612	tags=78%, list=40%, signal=47%	8877/5321/56848/6300/9047/5879/3315/5293/5594/5829/123745/9261/5880/6714/5881/5595/4893/5604/5582/207/842/5290/1432/5534/7867/5743/5894/5579/255189/5603/4846/4773/3791/8503/5747/5605/5532/5296/5600/572/100137049/5291/3845/5335/5530/7422
hsa04660	T cell receptor signaling pathway	103	0.477953	1.31781	0.00327434	0.00909538	0.00378708	13540	tags=74%, list=39%, signal=45%	926/927/5170/3458/1493/5133/916/919/1437/915/1019/3932/6300/29851/5062/7535/925/5293/5777/27040/917/5594/7124/8440/9020/5595/84433/6885/1739/8915/940/4893/8517/5604/4790/207/2932/5290/1432/3702/5534/5894/4793/7410/2885/5603/4773/10125/7409/5599/5970/1147/4775/8503/5605/5532/6654/5601/387/5609/920/9402/3586/5788/5058/4794/5296/3937/4690/5600/5291/10298/868/3845/5335/5530
hsa05134	Legionellosis	57	0.519197	1.38557	0.00346972	0.00952058	0.00396412	12306	tags=74%, list=36%, signal=47%	29108/3329/5861/841/10767/3593/1937/375/3592/3312/7124/840/836/1915/4790/3305/4615/7100/54205/7415/842/81876/23786/2919/4791/3304/3689/9554/1378/5970/56681/3569/3606/1195/3310/718/317/929/3684/1379/834/664
hsa04935	Growth hormone synthesis, secretion and action	120	0.459338	1.27374	0.00357032	0.00967857	0.00402991	10832	tags=55%, list=32%, signal=38%	399694/148327/1387/9586/2692/55811/1388/115/6300/5606/108/3710/468/5293/9564/64764/5332/5594/5595/23236/4893/6774/5604/5582/207/1398/6772/111/2778/2033/2932/3483/112/2773/6753/5290/1432/5330/6464/1399/1385/3708/90993/5894/6777/2771/5579/2885/5603/5608/5599/6776/2475/10488/5331/113/8503/5747/8835/5605/6654/2767/3486/4214/1386/5601
hsa04657	IL-17 signaling pathway	93	0.475919	1.30648	0.00371831	0.00994052	0.00413898	10832	tags=61%, list=32%, signal=42%	727897/4312/4314/3458/132014/6374/9641/9618/3320/1437/8061/6300/3326/84818/841/6426/4586/6354/5594/7124/3934/5595/6280/836/6885/7184/8517/53342/225689/4790/1051/29110/10758/8772/8717/2919/2932/23118/5598/1432/1994/5597/7186/3627/5743/7188/5603/23765/7187/5599/5596/5970/3569/51433/1147/7128/5601
hsa05205	Proteoglycans in cancer	203	0.434411	1.23237	0.00375531	0.00994052	0.00413898	14659	tags=69%, list=43%, signal=40%	80326/5170/89780/11211/2535/2817/84309/7480/7023/356/60/3059/7483/8826/6237/3480/7430/54361/2316/3316/6300/71/5879/3710/8326/5293/3593/27250/5777/29102/7476/5594/5829/7124/6382/6714/5595/836/22800/5499/5501/4893/5781/6774/8324/22808/5604/5582/595/8323/2064/5962/207/1655/2317/1499/7473/3693/5290/1432/6199/3091/23365/4659/2318/4193/1975/355/3708/5500/5894/3678/6198/5579/60495/7855/2065/7410/2885/56…
hsa04926	Relaxin signaling pathway	129	0.461974	1.28643	0.00382967	0.0100195	0.00417185	14289	tags=70%, list=42%, signal=41%	4312/399694/2786/148327/2792/51764/9586/1388/5590/115/6300/59345/108/468/5293/64764/5332/5594/59350/6714/5595/23236/1284/4843/4893/408/2769/5604/4790/1906/7046/207/1286/111/2778/117579/2790/2784/112/2773/5290/2787/2783/1432/2793/5330/6464/3640/1385/90993/5894/2771/2885/1285/5603/2782/55970/4846/5599/2788/5970/10488/5331/113/8503/5605/6654/1386/5601/1282/109/339403/5609/409/84699/5296/94235/4087/5…
hsa04115	p53 signaling pathway	73	0.496072	1.34716	0.0040568	0.0104917	0.00436848	8481	tags=53%, list=25%, signal=40%	7161/9133/1021/9134/6241/7249/898/983/3732/1111/891/51512/10572/1019/581/11200/1643/841/27113/5268/64065/836/6477/55240/598/1017/595/54205/842/64326/9538/545/637/8493/55367/4193/355/92344/1647
hsa04921	Oxytocin signaling pathway	154	0.450078	1.2634	0.00479635	0.0122634	0.00510616	13869	tags=64%, list=40%, signal=38%	51806/91807/53632/3768/6261/5321/60/7226/805/115/71/108/3710/59283/10398/5332/5594/123745/6714/340156/5595/23236/27092/3761/5499/5501/5562/4637/4893/91860/5604/5020/5582/595/29904/952/111/2778/785/112/6262/5571/2773/5598/810/782/5330/808/5534/3763/10645/4659/140465/3708/5743/5500/5894/2771/5579/255189/4846/784/4773/27091/5607/801/4638/54776/5331/6093/113/4775/5605/5532/387/1938/85366/109/9475/853…
hsa04662	B cell receptor signaling pathway	81	0.490027	1.338	0.00524251	0.0131063	0.00545712	15589	tags=84%, list=45%, signal=46%	640/973/933/930/1380/5879/5293/5777/27071/353514/5594/25780/5880/5881/5595/84433/8915/4893/8517/974/5604/55024/4790/207/2213/11025/2932/5290/10288/5534/5894/118788/5579/4793/7410/2885/29760/4773/7409/10990/5970/6850/1147/4775/8503/5605/5532/6654/10859/971/4794/5296/11006/11024/5291/3845/695/5530/8519/11027/975/79168/3265/5533/6655/3635/10892/4792
hsa04371	Apelin signaling pathway	138	0.45334	1.26519	0.00524251	0.0131063	0.00545712	13133	tags=64%, list=38%, signal=40%	51806/91807/2786/2792/53632/51764/8877/6261/6237/55811/56848/805/10891/115/59345/108/8678/3710/10014/5332/5594/187/4205/340156/5595/23236/4843/22800/5562/4893/91860/22808/999/5604/10672/595/7046/207/30849/7019/111/2790/2784/112/6262/5571/2773/810/2787/2783/2793/5330/808/6199/3708/5894/6198/2771/9759/2782/55970/4846/4899/2788/7350/801/4638/2475/5331/5140/113/4209/5605/85366/109/8862/23533/5327/942…
hsa04912	GnRH signaling pathway	93	0.470484	1.29156	0.00561432	0.0138816	0.00577992	14659	tags=71%, list=43%, signal=41%	51806/5337/5321/805/115/6300/5606/108/3710/468/5580/5332/5594/123745/6714/5595/23236/4893/91860/5604/3972/111/2778/112/5598/810/1432/5330/808/3708/5894/5579/2885/255189/5603/5608/5599/801/5331/113/10746/5605/6654/2767/4214/5601/109/5609/4216/818/5600/196883/2002/163688/100137049/817/6416/5338/3845/2185/1839/5566/4215/4323/2796/3265
hsa05100	Bacterial invasion of epithelial cells	77	0.484981	1.32276	0.0058374	0.0142763	0.00594426	13655	tags=75%, list=40%, signal=45%	399694/60/7414/3059/71/1213/10096/26084/5879/8218/1495/5293/391/9564/10097/10094/10459/5829/10801/10109/55964/6714/10093/999/10092/1731/1398/57180/10095/1499/1212/5290/3611/6464/4735/1785/1399/3678/23176/81873/1211/63916/867/8503/5747/3688/387/79767/23157/5296/23607/55752/8936/5291/10552/8976/1793/10163
hsa04928	Parathyroid hormone synthesis, secretion and action	106	0.464423	1.28122	0.00591176	0.0143026	0.00595525	13750	tags=67%, list=40%, signal=40%	64386/10568/148327/5141/4324/5337/9586/1388/115/8521/9368/108/3710/468/1591/50964/1594/64764/5332/5594/6569/4205/5595/23236/6257/408/5604/10672/11214/5582/111/2778/112/9365/2773/5330/7421/4666/1385/3708/2768/90993/5894/2771/5579/5142/860/9826/142680/369/4040/10488/5331/113/4209/2767/1386/387/109/4929/9138/409/84699/4326/6256/196883/6667/5338/5144/1839/5566
hsa04146	Peroxisome	82	0.480969	1.31466	0.00643229	0.0152344	0.0063432	15842	tags=79%, list=46%, signal=43%	255027/11264/3418/1962/26063/2181/215/55825/8309/10455/5264/5052/25824/5194/8504/10654/3417/196743/8799/4598/4843/55670/9409/847/5192/5827/10478/1384/54677/5191/5193/5824/10005/5828/84769/4358/23305/23600/8443/7498/30/5830/51/6647/8540/92960/84188/11001/373156/5190/6342/8310/8528/3295/26061/225/390916/5825/1610/10901/1891/5189/51268/8800/5195
hsa04061	Viral protein interaction with cytokine and cytokine receptor	98	0.475561	1.30797	0.00643229	0.0152344	0.0063432	14474	tags=67%, list=42%, signal=39%	643/4283/10563/8740/2833/8743/6374/1232/6355/6375/56477/6376/6351/6846/7852/53832/6348/6367/4049/53833/3560/3561/729230/6352/6354/6373/7124/8807/146433/2829/6368/8793/3570/1234/2919/1236/1230/2826/7133/3627/8764/1237/3569/3606/6369/3586/3588/8795/1435/6347/7132/1235/1233/3587/10344/6387/4055/6362/10803/6358/11009/9560/6360/8797/3579/5197
hsa04550	Signaling pathways regulating pluripotency of stem cells	143	0.445468	1.24469	0.00680409	0.0159471	0.00663996	15013	tags=68%, list=44%, signal=38%	2264/5013/1852/2263/80326/89780/8312/11211/2535/64211/658/2261/1749/7480/7044/3231/3211/3625/7483/5460/3720/3480/54361/6300/6929/8326/5293/1857/3718/7476/5594/3626/5595/4893/6774/8324/5604/8323/9869/207/1856/652/2932/1499/7473/84759/5290/6498/1432/84108/5080/5894/7855/659/2885/5603/2103/7471/5978/1855/4086/90/10297/8503/7976/648/5605/3399/93/3198/6932/8321/6926/91/56916/92/5296/4087/5600/55183/52…
hsa03250	Viral life cycle - HIV-1	62	0.510164	1.3752	0.00688533	0.0159711	0.00664997	11689	tags=71%, list=34%, signal=47%	1387/128866/6827/60489/6598/5903/7936/5901/200316/7852/51497/79643/27350/7514/5478/23534/9146/9972/904/10955/2648/164668/23299/25920/1234/11052/2033/140564/5045/25939/4600/79869/5300/10015/85363/55201/7251/4298/9638/7469/905/6829/920/11168
hsa04520	Adherens junction	71	0.487744	1.32231	0.00695977	0.0159791	0.00665327	8702	tags=55%, list=25%, signal=41%	83439/1387/60/7414/8826/3480/5818/6615/71/1459/5879/1495/5777/81607/1460/5594/10458/5770/5880/6714/5881/5595/6885/6934/999/87/7525/7082/2064/7046/2033/1499/51701/1457/117178/3643/7454/81/56288
hsa04215	Apoptosis - multiple species	32	0.570085	1.45304	0.00763928	0.017362	0.00722909	12017	tags=78%, list=35%, signal=51%	332/4804/581/8678/841/27113/840/836/578/598/54205/842/8772/637/56616/27429/331/329/57448/5599/5601/666/317/330/7132
hsa05214	Glioma	75	0.483642	1.31731	0.00785446	0.0174976	0.00728553	13501	tags=68%, list=39%, signal=41%	51806/399694/1869/1021/1870/7039/3480/805/1950/1019/581/1643/5293/5594/5155/5595/578/4893/91860/5604/5154/5582/595/207/810/5290/6464/808/4193/1647/5894/1871/5579/2885/369/801/2475/8503/5605/6654/5156/5925/8536/5296/818/163688/5291/817/4616/3845/5335
hsa04670	Leukocyte transendothelial migration	114	0.459268	1.27102	0.00784661	0.0174976	0.00728553	13978	tags=69%, list=41%, signal=41%	9080/9071/1366/9074/50848/1365/60/7414/7430/6300/71/7852/5879/58498/1495/23562/3683/5293/9564/10398/7408/653361/5829/3383/5880/5781/87/1364/5582/4689/1499/4688/2909/2773/5908/5290/1432/3702/29895/9075/399/3689/394/81/2771/5579/7410/5603/7409/83593/10627/49861/103910/4478/6093/8503/5747/3688/1500/1535/387/9475/137075/5296/3684/5600/1003/10411/4267/6387/5291/90952/1536/5335/2185/7122/5906/5175/6494
hsa04916	Melanogenesis	101	0.476631	1.31447	0.00799607	0.0176384	0.00734417	11894	tags=64%, list=35%, signal=42%	51806/80326/89780/148327/11211/2535/83439/1387/7480/7483/805/54361/115/108/8326/64764/1857/5332/434/7306/7476/5594/5595/23236/6934/4893/91860/8324/5604/5582/1906/8323/111/1856/2778/2033/2932/1499/112/7473/2773/810/4254/5330/808/1385/90993/5894/2771/5579/7855/7471/1855/801/10488/5331/113/7976/5605/6932/109/8321/4157/84699/818
hsa04723	Retrograde endocannabinoid signaling	148	0.445162	1.24716	0.00814552	0.0177936	0.0074088	13986	tags=67%, list=41%, signal=40%	2556/55879/774/4716/2786/2792/51764/4706/2892/2570/4709/2562/4715/115/4726/4719/6300/59345/4720/108/4711/3710/5332/4705/5594/55967/5595/23236/57030/4539/4710/246213/5582/4700/111/4717/2790/2784/112/4694/57406/2773/374291/2787/2783/4538/4704/1432/2793/5330/3763/2565/4731/4712/4697/4722/3708/5743/4723/2771/5579/4724/5603/2782/55970/747/5599/2788/4725/221955/5331/113/4695/2166/4702/5601/4707/4713/12…
hsa04919	Thyroid hormone signaling pathway	121	0.455513	1.26406	0.00829497	0.0179459	0.0074722	13501	tags=72%, list=39%, signal=44%	1733/5170/489/1387/7249/5208/60/3066/54361/481/71/5214/5293/8202/84812/90390/487/5332/5469/25942/4853/5594/117247/488/6714/5595/23236/6257/5211/4893/6513/10025/5604/9862/113026/1734/5582/2648/595/207/842/6772/9969/2033/478/652/2932/1499/5213/8648/5290/5330/3091/5333/4193/4851/483/5894/5579/4625/9611/2475/29079/5331/9442/8503/476/5605/482/4855/8841/3685/5296/4624/9440/6256/572/1827/5291/3690/10231…
hsa04137	Mitophagy - animal	72	0.496027	1.34563	0.00875208	0.0187545	0.00780888	13738	tags=76%, list=40%, signal=46%	1869/338382/89941/6237/6233/9451/8678/1459/468/55669/7314/10241/79065/1460/8878/6714/22800/8887/4893/22808/598/29110/9474/4077/79735/9958/23786/54543/192111/9101/1457/3091/139341/7316/8408/7879/5599/9927/5970/7311/55288/2309/55626/5601/10370/11337/283106/664/64786/84557/6667/3845/10133/81631/51024
hsa04540	Gap junction	88	0.472913	1.2968	0.00904225	0.0191935	0.00799166	11213	tags=58%, list=33%, signal=39%	10382/79861/84790/153/983/203068/347688/1950/115/7277/51807/108/10376/81027/3710/5332/5594/5155/6714/5595/23236/4893/5604/10383/7082/7280/5154/5582/1453/111/2778/347733/84617/112/2773/5598/5330/3708/5894/2771/5579/2885/5607/5331/113/10746/5605/6654/2767/5156/109
hsa05323	Rheumatoid arthritis	88	0.4718	1.29374	0.00964007	0.0202712	0.0084404	13769	tags=67%, list=40%, signal=40%	4312/4314/50617/527/3458/1493/3112/6374/3117/3119/1437/3123/534/90423/3108/6348/3683/6352/3383/7124/528/940/3122/3111/3115/51382/10673/3127/529/284/2919/245973/3109/3689/8741/525/535/9296/3113/4050/3569/9114/3606/3552/537/23545/942/1435/6347/8992/10312/6387/7042/51561/523/1514/7422/7040/941
hsa04659	Th17 cell differentiation	105	0.453074	1.2498	0.0108357	0.0225744	0.0093994	15347	tags=76%, list=45%, signal=42%	3458/3112/3117/3119/916/919/3320/3123/915/3932/6300/3326/30009/3108/7535/246778/3560/27040/3718/3561/917/5594/5595/6257/3122/6774/8517/3566/3111/4790/3115/3662/50615/3127/7046/7297/6772/3570/3594/3109/1432/5534/3091/6777/4793/5603/4773/50943/3113/5599/6776/5970/3569/2475/1147/4775/5532/3459/5601/6095/920/4794/4087/5600/6256/6778/51561/59067/5335/5530/7040/6097/9466/10148/5914/3556/149233/5533/360…
hsa05320	Autoimmune thyroid disease	49	0.513428	1.35479	0.0118032	0.0241429	0.0100525	9396	tags=49%, list=27%, signal=36%	3135/1493/3112/3117/5551/356/3119/3123/3108/3002/3134/3105/940/3122/3111/3115/3127/3133/3106/3109/3107/355/958/3113
hsa04390	Hippo signaling pathway	156	0.431987	1.21305	0.0117325	0.0241429	0.0100525	12308	tags=59%, list=36%, signal=38%	5522/332/80326/7161/89780/8312/11211/2535/658/656/83439/7480/60/25937/7483/54361/5590/268/71/7159/27113/55233/1495/8326/7529/7005/1857/7476/8994/7534/3993/26524/4771/5499/7004/5501/1739/7531/6934/7533/8324/999/595/655/8323/7046/1453/7532/3996/1856/652/2932/1499/7473/2736/64398/5584/8463/10971/3689/5519/5500/56288/7855/659/329/5518/5515/85407/8200/894/7471/1741/9113/1855/4086/9231/55844/1742/1454/…
hsa01523	Antifolate resistance	30	0.562132	1.41985	0.0121118	0.024551	0.0102224	11811	tags=80%, list=34%, signal=52%	471/6472/7298/2348/7124/1244/8517/4790/6573/4363/10057/239/4524/6470/5970/3569/8714/1147/2350/2618/2356/113235/200895/2352
hsa04330	Notch signaling pathway	59	0.494582	1.32509	0.012355	0.0248202	0.0103345	13773	tags=75%, list=40%, signal=45%	1387/342371/3066/113878/3280/1857/9541/4853/51107/9612/22938/79816/2648/1488/3955/6868/1856/2033/151636/3714/5663/5986/23385/8650/4851/3516/1855/7088/28514/84441/11317/9253/4855/1840/5664/7090/1487/9794/54567/182/55851/3065/102723796/10683
hsa05210	Colorectal cancer	86	0.463985	1.26965	0.0129281	0.0257418	0.0107182	13722	tags=67%, list=40%, signal=41%	332/8312/83439/7039/1950/581/1643/5879/27113/5293/5594/5880/5881/5595/836/2956/4436/578/6934/4893/5604/595/54205/7046/207/842/4292/2932/1499/5898/5290/5899/6199/1647/5894/6198/2885/26060/5599/369/2475/10297/8503/1630/5605/6654/5601/387/6932/5296/4087/572/5291/7042/4616/3845/10018/7040
hsa04261	Adrenergic signaling in cardiomyocytes	154	0.437121	1.22703	0.0141238	0.0278758	0.0116068	12922	tags=59%, list=38%, signal=37%	51806/5522/489/148327/5502/7134/9586/153/7169/805/5525/1388/115/6300/64208/481/7170/108/59283/468/154/64764/487/5332/492/5594/488/5595/23236/27092/5499/5501/91860/7171/5527/183/207/5528/111/2778/478/785/112/6262/2773/810/782/1432/5330/808/11149/5519/1385/483/90993/5500/2771/7168/4625/5518/5603/5515/784/27091/102723475/5529/55844/801/10488/5331/113/476/1386/482/109/23533/84699/818/4624/59285/5523/…
hsa05223	Non-small cell lung cancer	72	0.487669	1.32295	0.0150355	0.0294173	0.0122486	13501	tags=71%, list=39%, signal=43%	1869/5170/1021/5979/3798/27436/1870/5915/7039/1950/1019/581/1643/5293/3718/5594/5595/6257/578/4893/6774/5604/5582/595/2064/207/842/6789/5290/1647/5894/1871/6777/5579/2885/6776/83593/369/2309/8503/5605/6654/5925/5296/6256/572/11186/5291/4616/3845/5335
hsa04640	Hematopoietic cell lineage	95	0.464528	1.27564	0.0178734	0.034372	0.0143116	12120	tags=63%, list=35%, signal=41%	926/927/924/7037/3112/933/3117/3119/916/1437/3123/915/914/3655/930/1380/3581/3108/925/3568/931/1604/100133941/917/7066/7124/290/2323/966/3122/3566/921/3111/3115/2208/3127/2811/952/3570/2814/951/3109/4254/2056/3678/1378/3590/3674/3113/3569/928/3552/912/920/3673/2209/929/3684/1435/1379
hsa04922	Glucagon signaling pathway	107	0.449688	1.24	0.0178734	0.034372	0.0143116	13133	tags=64%, list=38%, signal=39%	51806/148327/53632/1387/9586/5531/5315/805/5257/10891/5836/5261/108/139420/3276/3710/468/31/5214/57223/5834/5162/64764/5332/23236/5211/5562/91860/6513/5223/55671/2997/3939/207/2642/2778/2033/200186/5213/5571/810/8789/5330/808/5534/1375/1385/3708/90993/2645/92579/801/5160/10488/5331/5140/5532/1386/3945/84699/818/5564/23235/163688/441531/817/92483/5563
hsa04014	Ras signaling pathway	235	0.410891	1.17191	0.0211777	0.0403812	0.0168137	15285	tags=69%, list=45%, signal=38%	51806/2264/399694/2263/2786/4804/2792/2261/5337/51764/8437/1944/26291/5321/5923/356/1943/6237/7039/3480/805/1950/4909/59345/5062/7535/1945/5879/5966/1969/5293/2904/27040/54979/5594/25780/123745/5155/5880/5228/5878/5881/2323/5595/8398/22800/5863/4893/91860/5781/8517/22808/598/10928/5604/4790/1946/64926/9771/5154/5582/11145/29110/1942/284/382/207/2790/6789/5898/2784/5908/810/5290/2787/2783/5899/425…
hsa05230	Central carbon metabolism in cancer	69	0.47499	1.28572	0.025	0.046875	0.0195175	14699	tags=75%, list=43%, signal=43%	2263/3418/2261/9123/80201/5979/5315/8140/3099/6510/5214/5293/5162/3417/5594/2744/5595/5211/4893/6513/5604/2539/5223/2064/3939/207/5213/5290/3091/5894/57103/2645/2475/5160/23410/51548/3098/8503/5605/5156/3945/5296/3101/441531/5291/92483/3845/4233/5163/4609/3265/3815
hsa04750	Inflammatory mediator regulation of TRP channels	98	0.452859	1.24553	0.024975	0.046875	0.0195175	16013	tags=77%, list=47%, signal=41%	51806/55515/162514/5321/805/115/6300/5606/3827/108/3710/623/41/5293/5580/5332/123745/6714/23236/8398/5499/59341/5501/91860/5582/111/2778/3269/112/810/5290/1432/5330/808/239/3708/5500/5579/255189/5603/5608/5599/801/5583/5331/113/8503/5601/109/5296/818/624/5600/196883/163688/100137049/5291/817/3356/5335/1573/5566/4803/5732/51393/79054/3556/5581/7442/3553/3358/5029/5734/8989/51802
hsa04744	Phototransduction	28	0.557683	1.39704	0.0258479	0.0479029	0.0199455	13154	tags=75%, list=38%, signal=46%	51806/2792/5158/805/2978/9187/8787/91860/2979/3000/810/808/131890/2782/5145/801/5148/1258/2779/163688/6011
hsa04915	Estrogen signaling pathway	137	0.433596	1.20995	0.025974	0.0479029	0.0199455	10863	tags=53%, list=32%, signal=37%	51806/125115/399694/148327/390792/9568/3880/9586/3320/3866/7039/805/1388/115/9166/3326/25984/108/1509/3883/3710/468/5293/8202/2289/3857/64764/5580/5332/5594/3875/3312/6714/5595/23236/8687/7184/4893/91860/5604/3305/8689/207/111/2778/112/2773/8648/3858/810/5290/3304/5330/6464/808/3763/1385/3708/90993/5894/2771/2885/4846/801/10488/5331/113/8503/5605/6654/3882/1386/3310
hsa05220	Chronic myeloid leukemia	76	0.464894	1.26755	0.027972	0.0507557	0.0211334	13722	tags=68%, list=40%, signal=41%	399694/1869/1021/1870/3066/1019/581/1643/5293/613/5594/5595/578/4893/5781/8517/598/5604/4790/595/1488/7046/207/1398/5290/6464/1399/4193/1647/5894/1871/6777/2885/867/6776/5970/369/1147/8503/5605/6654/1027/5925/5296/1487/572/5291/7042/3065/4616/3845/7040
hsa04514	Cell adhesion molecules	154	0.42745	1.19988	0.027972	0.0507557	0.0211334	11921	tags=55%, list=35%, signal=36%	926/927/3135/3897/9080/1493/9071/1366/9074/3112/50848/3384/1365/5133/933/3117/8174/3119/4359/201633/102723996/3123/914/3655/923/5818/29851/22854/23308/3108/925/1013/23562/3683/3134/80381/94030/3695/6402/3383/6382/3105/940/3122/999/3111/4756/3115/1364/3127/1001/3133/5817/6693/2734/3106/84631/6404/3109/3107/9075/64115/3689/10666/958/9019/6385/3113/3385/29126/49861/6614/25945/3688/79679/5802/942/920…
hsa05221	Acute myeloid leukemia	67	0.467852	1.26625	0.033966	0.0611389	0.0254566	15240	tags=79%, list=44%, signal=44%	890/83439/3728/1978/1437/597/5293/5594/8864/5371/5595/6934/4893/6774/8517/5604/4790/5467/595/207/5290/6199/1848/5894/6777/6198/2885/6776/5970/369/2475/1147/8503/5605/6654/11040/6932/1053/6688/2209/5296/929/3684/572/5291/3845/4609/5914/3265/3815/4353/5292/6655
hsa05216	Thyroid cancer	37	0.504275	1.30348	0.0351759	0.0628141	0.0261542	6931	tags=49%, list=20%, signal=39%	83439/5979/581/1643/7170/5594/7849/5595/6257/578/6934/4893/10342/999/5604/595/7175/1499
hsa05110	Vibrio cholerae infection	50	0.484114	1.28104	0.0361446	0.0640357	0.0266628	13750	tags=70%, list=40%, signal=42%	50617/527/6558/11015/60/115/71/534/90423/11014/30001/375/528/23480/10952/7082/51382/529/2778/29927/245973/10945/525/535/9296/9114/537/23545/109/9601/8992/10312/5335/523/5566
hsa05143	African trypanosomiasis	36	0.503743	1.29795	0.0371859	0.0643603	0.026798	10521	tags=56%, list=31%, signal=39%	3458/8542/356/3827/3593/5332/3592/3383/7124/23236/4615/5582/3620/5330/355/5579/7064/3569/5331/3606
hsa04910	Insulin signaling pathway	137	0.428063	1.19451	0.036963	0.0643603	0.026798	13521	tags=67%, list=39%, signal=41%	51806/399694/5170/53632/7249/80201/1978/805/5257/10891/5590/3099/10211/5836/5261/9470/3632/2194/31/5293/5834/5575/5509/5594/5770/5595/6720/5499/5501/5562/4893/91860/2872/253314/5604/2997/2319/207/1398/5507/2932/57521/5571/810/5290/8789/6464/808/5584/6199/3643/1399/9322/5500/5894/6198/2885/867/5599/2645/5577/92579/369/801/2475/5140/3098/8503/7248/8835/5605/5506/6654/5601/5576/23265/23433/5573/5296…
hsa04151	PI3K-Akt signaling pathway	352	0.388036	1.1216	0.036963	0.0643603	0.026798	10796	tags=45%, list=31%, signal=31%	23566/5522/2264/1299/54541/2263/64223/2786/5170/3918/148327/3914/8515/4804/2792/1021/2261/10319/9134/7249/51764/3691/9586/1944/26291/898/1978/356/3320/1943/7039/3480/5525/1950/1019/1388/3655/930/4909/3326/59345/11140/9470/1945/5879/468/1969/5293/8115/7529/64764/3560/3718/3561/5594/3695/7534/5155/5228/2323/5595/1284/5562/7184/7531/4893/1128/7533/3915/8517/3566/9170/598/5527/253314/5585/5604/4790/1…
hsa04380	Osteoclast differentiation	125	0.429694	1.19441	0.038961	0.0664109	0.0276518	14480	tags=66%, list=42%, signal=38%	3458/55423/8061/3932/6300/5879/5293/2215/2274/653361/353514/5594/8878/7124/9020/5595/6885/8517/5604/4790/1540/7046/207/7297/6772/2213/4689/11025/4791/4688/23118/5290/1432/10288/5971/5534/7186/1385/7305/2885/5603/2214/29760/4773/5608/5599/10454/10990/5970/6850/1147/8503/3552/5532/3459/10859/5601/140885/1535/27035/5609/6688/2209/5296/1435/7132/3937/54209/5600/11006/7189/11024/5291/3690/7042/695/553…
hsa05206	MicroRNAs in cancer	266	0.397755	1.13977	0.038961	0.0664109	0.0276518	15002	tags=50%, list=44%, signal=28%	399694/54541/1869/7329/89780/1789/113130/10642/1021/2261/9493/9134/1387/6624/993/1944/6541/6659/898/1870/85414/1943/995/3066/7430/1945/1786/5268/1591/5293/10014/27250/6768/4853/5594/5155/2744/5595/836/578/4893/406886/6774/994/5604/3925/4790/1946/5154/5582/595/2064/5962/1942/1398/672/2033/7473/57521/4363/5598/5290/6464/3162/4082/1399/4193/4851/3190/5743/5894/3678/1871/5579/7168/659/1788/9759/2065/…
hsa05310	Asthma	27	0.530528	1.32467	0.0448065	0.0758005	0.0315614	9396	tags=56%, list=27%, signal=40%	3112/3117/3119/3123/3108/7124/3122/3111/3115/3127/3109/2207/958/5553/3113
hsa01522	Endocrine resistance	95	0.441997	1.21377	0.045954	0.0765901	0.0318901	13773	tags=71%, list=40%, signal=42%	399694/1869/638/1565/1870/3480/1019/115/6300/581/108/5293/8202/5469/4853/5594/6714/5595/10498/4893/5604/595/2064/207/111/2778/112/3714/5290/1432/6464/6199/4193/4851/5894/1871/6198/2885/5603/5599/9611/369/28514/2475/113/8503/5747/5605/6654/5601/4855/1031/1027/109/5925/5296/54567/5600/196883/572/5291/182/6667/3845/1839/5566/10683
hsa04620	Toll-like receptor signaling pathway	102	0.436873	1.20433	0.045954	0.0765901	0.0318901	12988	tags=58%, list=38%, signal=36%	4283/9641/6351/6300/5606/841/5879/6348/5293/3593/3592/3663/6352/148022/5594/6373/7124/5595/6885/8517/5604/4790/4615/7100/29110/207/6772/3654/8772/23118/10333/5290/1432/51135/8737/3627/3661/958/5603/5608/7187/5599/10454/5970/3569/1147/8503/5605/5601/942/5609/23643/5296/929/114609/5600/7189/5291/6416
hsa05321	Inflammatory bowel disease	62	0.462729	1.24733	0.049	0.0810662	0.0337539	13957	tags=69%, list=41%, signal=41%	3458/64127/3112/3117/3119/3123/30009/3108/3593/3592/3561/7124/6775/8807/3122/6774/3566/3111/4790/3115/7100/50615/3127/6772/3594/3595/3109/50943/3113/5970/3569/3606/3552/3459/6095/3586/4087/6778/7042/51561/59067/7040/6097
